# Supplementary material for: A Priority Setting Partnership for care improvement of Hypertensive Disorders of Pregnancy in Ghana - A National Research Agenda
Source: Research Square preprint supplement (doi:10.21203/rs.3.rs-6998814/v1), 2025-08-11
Supplement: Supplementary file 1 [file 35d0285ef45e951128db2b88.docx]

## **Supplementary Material 2 – Literature review**

| 1. Literature review findings and justification (Diagnosis) | Page 2 |
| --- | --- |
| 1. Literature review findings and justification (Treatment) | Page 33 |
| 1. Literature review findings and justification (Prognosis) | Page 49 |
| 1. Literature review findings and justification (Causes and Risk factors) | Page 65 |

| **DIAGNOSIS**  **A. Literature review findings and justification** | | | | | | |
| --- | --- | --- | --- | --- | --- | --- |
| **ID** | **Uncertainty** | **Search string** | **Search results** | **Evidence: sources** | **Evidence: summary** | **Judgment** |
| D_01 | What are the challenges for healthcare professionals in Ghana in diagnosing HDP?   (Domains: diagnostic accuracy, absence of diagnostic criteria, early/timely diagnosis, knowledge and expertise, clear diagnostic criteria, collaboration between different cadres) | HDP synonyms* AND (Diagnosis [MeSH] OR diagnos*[Title/Abstract] OR identificat*[Title/Abstract]) AND (“Health Personnel”[MeSH] OR "clinician*"[Title/Abstract] OR "physician*"[Title/Abstract] OR "doctor*"[Title/Abstract] OR "medical practitioner*"[Title/Abstract] OR "healthcare practitioner*"[Title/Abstract] OR "health practitioner*"[Title/Abstract] OR "healthcare provider*"[Title/Abstract] OR "healthcare worker*"[Title/Abstract] OR "medical professional*"[Title/Abstract] OR "nurse*"[Title/Abstract] OR "midwi*"[Title/Abstract] OR HCP[Title/Abstract] OR "healthcare professional*"[Title/Abstract])  AND  Location synonyms* | **Pubmed:**  June 10th, 2024  9 (Ghana 2019-2024, all study types)  18 (west Africa 2019-2024, all study types)  43 (SSA 2019-2024, all study types)  **Cochrane:**  June 11th, 2024  0 (Ghana 2019-2024, all study types)  2 (West Africa 2019-2024, all study types)  16 (SSA 2019-2024, all study types)  **Scopus:**  June 18th, 2024  11 (Ghana 2019-2024, all study types)  45 (West Africa 2019-2024, all study types)  80 (SSA 2019-2024, all study types) | **Reviews: Ghana/west Africa:** none  **SSA:** Pallangyo, A. S., & Seif, S. A. (2023). Knowledge and Attitude of Healthcare Providers on Managing Pre-Eclampsia and Eclampsia During Antenatal Care in Mwanza Region-Tanzania. SAGE Open Nursing, 9, 23779608231193745.  Gudu, W., & Sripad, P. (2020). BARRIERS TO THE DETECTION, MANAGEMENT and PREVENTION OF PREECLAMPSIA/ECLAMPSIA IN ETHIOPIA: FORMATIVE REVIEW. Ethiopian Journal of Reproductive Health, 12(4), 12-12. **Single studies: Ghana:** Atluri, N., Beyuo, T. K., Oppong, S. A., Moyer, C. A., & Lawrence, E. R. (2023). Challenges to diagnosing and managing preeclampsia in a low-resource setting: A qualitative study of obstetric provider perspectives from Ghana. PLOS Global Public Health, 3(5), e0001790.  Garti, I., Gray, M., Bromley, A., & Tan, J. Y. B. (2024). Pre-eclampsia training needs of midwives in a Ghanaian tertiary hospital: A cross-sectional study. Nurse Education in Practice, 75, 103872. **West-africa:** Olaoye, T., Oyerinde, O. O., Elebuji, O. J., & Ologun, O. (2019). Knowledge, perception and management of pre-eclampsia among health care providers in a maternity hospital. International Journal of Maternal and Child Health and AIDS, 8(2), 80.  **SSA:** Nkamba, D. M., Vangu, R., Elongi, M., Magee, L. A., Wembodinga, G., Bernard, P., ... & Robert, A. (2020). Health facility readiness and provider knowledge as correlates of adequate diagnosis and management of pre-eclampsia in Kinshasa, Democratic Republic of Congo. BMC health services research, 20, 1-13.  Joshi, A., Beyuo, T. K., Oppong, S. A., Moyer, C. A., & Lawrence, E. R. (2022). ‘I don’t really understand this BP’: Women’s knowledge, attitudes, and experiences with preeclampsia in Ghana. PLOS Global Public Health, 2(7), e0000121.  Sevene, E., Boene, H., Vidler, M., Valá, A., Macuacua, S., Augusto, O., ... & CLIP Feasibility Working Group Rosa Pires Zefanias Nhamirre Rogério Chiaú Analisa Matavele Adérito Tembe Lina Machai Beth Payne Sharla Drebit Chirag Kariya Laura Magee. (2021). Feasibility of task-sharing with community health workers for the identification, emergency management and referral of women with pre-eclampsia, in Mozambique. Reproductive Health, 18, 1-16.  Yasin, C., Geleto, A., & Berhane, Y. (2019). Referral linkage among public health facilities in Ethiopia: a qualitative explanatory study of facilitators and barriers for emergency obstetric referral in Addis Ababa city administration. Midwifery, 79, 102528.  **Global & LMICs:** not searched | Studies clearly show that HCP in sub-Saharan Africa face challenges in the detection of HDP on different levels: lack of medical supplies for diagnosis, lack of knowledge and competence of HCP (even though one study from Congo found the opposite), low literacy/education of the general public, human resource constraints, lack of staff motivation and outdated guidelines and protocols. However, reviews are scarce and the data from Ghana only comprises two studies. This question is highly context-specific, emphasizing the need for more research in this area in Ghana. | Broadly unanswered |
| D_02 | What are the diagnostic criteria for HDP?   (Domains: in general, symptoms, blood pressure ranges, baseline blood pressure level determination, role of proteinuria, patient history, role of serum hemoglobin, differentiation between HDP, differential diagnoses) | HDP synonyms* AND (Diagnosis [MeSH] OR diagnos*[Title/Abstract] OR identificat*[Title/Abstract] OR Detect*[Title/Abstract]) AND (Standards[MeSH] OR Clinical Protocols[MeSH] OR protocol*[Title/Abstract] OR criteri*[Title/Abstract] OR standard*[Title/Abstract] OR require*[Title/Abstract] OR indicator*[Title/Abstract] OR guide*[Title/Abstract] OR parameter*[Title/Abstract] OR condition*[Title/Abstract] OR rule*[Title/Abstract]) AND SSA synonyms OR LMIC synonyms | **Pubmed:**  June 13th, 2024  49 (SSA+LMIC 2019-2024, reviews)  573 (global 2021-2024, reviews)  **Cochrane:** June 13th, 2024  3 (SSA+LMIC 2019-2024, reviews)  **Scopus:**  N/A | **Reviews: Global:** 583 results = not feasible to screen --> searched for LMIC OR SSA  **SSA/LMICs:** Toledo-Jaldin, L., Bull, S., Contag, S., Escudero, C., Gutierrez, P., Heath, A., ... & Moore, L. G. (2019). Critical barriers for preeclampsia diagnosis and treatment in low-resource settings: An example from Bolivia. Pregnancy hypertension, 16, 139-144.  Kurjak, A., Medjedovic, E., & Stanojević, M. (2023). Use and misuse of ultrasound in obstetrics with reference to developing countries. Journal of Perinatal Medicine, 51(2), 240-252.  Khaliq, O. P., Phoswa, W. N., & Moodley, J. (2023). The effectiveness of the Congo Red Dot paper test in hypertensive disorders of pregnancy: A systematic review and meta-analysis. Frontiers in Reproductive Health, 5, 1120937.  **GHS Standard Treatment Guidelines:** no diagnostic criteria for HDP mentioned **ISSHP Guideline:** clear diagnostic criteria, including a few remarks about priorities in case of under-resourced settings | The ISSHP guidelines for diagnostic criteria are clear, and the large number of global reviews show that there is a broad evidence base for this question. | Broadly answered |
| D_03 | What is the accuracy of screening and diagnosis of HDP among women in Ghana, and how can this be improved?   (Domains: frequency of checks, type of checks, number of checks needed for diagnosis, location of screening, timing of diagnosis, possibility of home screening/diagnosis, accuracy and functionality of hospital diagnostic tests, hospital infrastructure) | HDP synonyms*  AND  (Accura*[Title/Abstract] OR Precis* [Title/Abstract] OR Correctness [Title/Abstract] OR Exact*[Title/Abstract] OR appropriate*[Title/Abstract] OR quality[Title/Abstract] OR viab*[Title/Abstract] OR Prenatal Care[MeSH] OR Maternal Health Services[MeSH] OR antenatal[Title/Abstract] OR ANC[Title/Abstract] OR prenatal*[Title/Abstract] OR pregnancy care[Title/Abstract] OR maternal care[Title/Abstract] OR maternity care[Title/Abstract] OR maternal health service*[Title/Abstract] OR Diagnosis [MeSH] OR diagnos*[Title/Abstract] OR identificat*[Title/Abstract] OR Detect*[Title/Abstract] OR monitor*[Title/Abstract] OR home-based*[Title/Abstract] OR home based*[Title/Abstract] OR infrastructure[Title/Abstract] OR system*[Title/Abstract] OR service* [Title/Abstract])  AND  Location synonyms* | **Pubmed:**  June 14th, 2024  67 (Ghana 2019-2024, all study types)  **Cochrane:**  June 14th, 2024 11 (Ghana 2019-2024, all study types)  **Scopus:**  N/A | **Reviews: Ghana:** Garti, I., Gray, M., Bromley, A., & Tan, J. Y. B. (2022). A qualitative document analysis of policies influencing preeclampsia management by midwives in Ghana. Women and Birth, 35(6), 612-618.  **Single studies: Ghana:**  Atluri, N., Beyuo, T. K., Oppong, S. A., Compton, S. D., Moyer, C. A., & Lawrence, E. R. (2023). Benefits and barriers of home blood pressure monitoring in pregnancy: perspectives of obstetric doctors from a Ghanaian tertiary hospital. BMC Pregnancy and Childbirth, 23(1), 42.  Newman, N., Beyuo, T. K., Nartey, B. A., Segbedzi-Rich, E., Pangori, A., Moyer, C. A., ... & Lawrence, E. R. (2024). Facilitators and barriers to home blood pressure monitoring among pregnant women in Ghana: a mixed-methods analysis of patient perspectives. BMC Pregnancy and Childbirth, 24(1), 208.  Lawrence, E. R., Atluri, N., Compton, S., & Beyuo, T. K. (2022). Provider-perceived acceptability, feasibility, and appropriateness of home blood pressure monitoring in Ghana. International Journal of Gynaecology and Obstetrics: the Official Organ of the International Federation of Gynaecology and Obstetrics.  Lawrence, E. R., Beyuo, T. K., Newman, N., Klutse, M. A., Asempa, J. K., Pangori, A., ... & Oppong, S. A. (2023). Ability and accuracy of patient-performed blood pressure monitoring among pregnant women in urban Ghana. AJOG Global Reports, 3(3), 100243.  Amponsah-Tabi, S., Dassah, E. T., Asubonteng, G. O., Ankobea, F., Annan, J. J., Senu, E., ... & Opare-Addo, H. S. (2022). An assessment of the quality of antenatal care and pregnancy outcomes in a tertiary hospital in Ghana. Plos one, 17(10), e0275933.  Abejirinde, I. O. O., De Brouwere, V., van Roosmalen, J., van der Heiden, M., Apentibadek, N., Bardají, A., & Zweekhorst, M. (2019). Viability of diagnostic decision support for antenatal care in rural settings: findings from the Bliss4Midwives Intervention in Northern Ghana. Journal of global health, 9(1).  Gerth-Guyette, E., Adu-Gyasi, D., Agyemang, C. T., Bansil, P., Barney, R., Knudson, S., ... & Leader, B. T. (2022). Evaluation of a protein-to-creatinine dipstick diagnostic test for proteinuria screening in selected antenatal care clinics in three Districts in the Bono-East Region of Ghana. Pregnancy Hypertension, 30, 21-30.  Boachie-Ansah, P., Anto, B. P., Marfo, A. F. A., Dassah, E. T., Mozu, I. E., & Attakora, J. (2023). Quality of antenatal care and outcomes of Hypertensive Disorders in Pregnancy among antenatal attendees: A comparison of urban and periurban health facilities in Ghana. Plos one, 18(12), e0294327.  Beyuo, T. K., Lawrence, E. R., Oppong, S. A., Kobernik, E. K., Amoakoh-Coleman, M., Grobbee, D. E., ... & Bloemenkamp, K. W. M. (2023). Impact of antenatal care on severe maternal and neonatal outcomes in pregnancies complicated by preeclampsia and eclampsia in Ghana. Pregnancy Hypertension, 33, 46-51.  Adu-Bonsaffoh, K., Tamma, E., Nwameme, A. U., & Browne, J. L. (2022). Health professionals' perspectives on clinical challenges in managing hypertensive disorders of pregnancy and recommendations for improving care: A multi-center qualitative study. Frontiers in Global Women's Health, 3, 968914.  Vestering, A., de Kok, B. C., Browne, J. L., & Adu-Bonsaffoh, K. (2021). Navigating with logics: care for women with hypertensive disorders of pregnancy in a tertiary hospital in Ghana. Social Science & Medicine, 289, 114402.  Atluri, N., Beyuo, T. K., Oppong, S. A., Moyer, C. A., & Lawrence, E. R. (2023). Challenges to diagnosing and managing preeclampsia in a low-resource setting: A qualitative study of obstetric provider perspectives from Ghana. PLOS Global Public Health, 3(5), e0001790.  Kuupiel, D., Adu, K. M., Bawontuo, V., Tabong, P. T., Adogboba, D. A., & Mashamba-Thompson, T. P. (2020). Geographical access to point-of-care testing for hypertensive disorders of pregnancy as an integral part of maternal healthcare in Ghana. BMC Pregnancy and Childbirth, 20, 1-9.  Abejirinde, I. O. O., De Brouwere, V., van Roosmalen, J., van der Heiden, M., Apentibadek, N., Bardají, A., & Zweekhorst, M. (2019). Viability of diagnostic decision support for antenatal care in rural settings: findings from the Bliss4Midwives Intervention in Northern Ghana. Journal of global health, 9(1).  **Global, LMICs, SSA, West-africa:** not searched **GHS Standard Treatment Guidelines:** no diagnostic accuracy for HDP mentioned | There are quite some articles from Ghana that discuss the different problems of diagnostic accuracy of HDP, as well as a few that test different solutions to improve this (such as home-based BP monitoring, diagnostic decision support, improving health systems and resources, improving ANC attendance, different proteinuria measurements). However, studies are often only performed in specific hospitals/community health facilities and lerger review data is missing. | Partly unanswered |
| D_04 | To what extent do HDP patients in Ghana attend antenatal care? | (Patient Compliance[MeSH] OR utili*[Title/Abstract] OR Attend*[Title/Abstract] OR non-attend*[Title/Abstract] OR Presen*[Title/Abstract] OR cover*[Title/Abstract] OR Participat*[Title/Abstract] OR Showing up[Title/Abstract] OR show up[Title/Abstract] OR go to[Title/Abstract] OR goes to[Title/Abstract] OR come to[Title/Abstract] OR comes to[Title/Abstract] OR access*[Title/Abstract])   AND   (Prenatal Care[MeSH] OR Maternal Health Services[MeSH] OR antenatal[Title/Abstract] OR ANC[Title/Abstract] OR prenatal*[Title/Abstract] OR pregnancy care[Title/Abstract] OR maternity care[Title/Abstract] OR maternal care[Title/Abstract] OR maternal health service*[Title/Abstract])  AND  Location synonyms* | **Pubmed:**  June 14th, 2024  222 (Ghana 2021-2024, all study types)  **Cochrane:**  June 14th, 2024 53 (Ghana 2021-2024, all study types)  **Scopus:**  June 18th, 2024 266 (Ghana 2019-2024, all study types) --> only screened reviews 11 (Ghana 2019-2024, reviews) | **Reviews: Ghana:** Yunitasari, E., DU, W. P., NK, A. A., Sudarsiwi, N. P., & Ramoo, V. (2023). Analysis of factors that affect the utilization of antenatal care in developing countries: A systematic review. JPMA. The Journal of the Pakistan Medical Association, 73(2), S162-S169.  Anaba, E. A., & Afaya, A. (2022). Correlates of late initiation and underutilisation of the recommended eight or more antenatal care visits among women of reproductive age: insights from the 2019 Ghana Malaria Indicator Survey. BMJ open, 12(7), e058693. **All studies: Ghana:** Ekholuenetale, M., Nzoputam, C. I., & Barrow, A. (2021). Prevalence and socioeconomic inequalities in eight or more antenatal care contacts in Ghana: findings from 2019 population-based data. International journal of women's health, 349-360.  Bassoumah, B., Adam, A. M., & Adokiya, M. N. (2021). Challenges to the utilization of Community-based Health Planning and Services: the views of stakeholders in Yendi Municipality, Ghana. BMC Health Services Research, 21, 1-9.  Rahman, M., Hossain, F., Islam, R., Jung, J., Mahmud, S. R., & Hashizume, M. (2022). Equity in antenatal care visits among adolescent mothers: An analysis of 54 country levels trend and projection of coverage from 2000 to 2030. Journal of Global Health, 12.  Duodu, P. A., Bayuo, J., Mensah, J. A., Aduse-Poku, L., Arthur-Holmes, F., Dzomeku, V. M., ... & Nutor, J. J. (2022). Trends in antenatal care visits and associated factors in Ghana from 2006 to 2018. BMC Pregnancy and childbirth, 22(1), 59.  Anaba, E. A., Alor, S. K., & Badzi, C. D. (2022). Utilization of antenatal care among adolescent and young mothers in Ghana; analysis of the 2017/2018 multiple indicator cluster survey. BMC Pregnancy and Childbirth, 22(1), 544.  Enos, J. Y., Amoako, R. D., & Doku, I. K. (2021). Utilization, predictors and gaps in the continuum of care for maternal and newborn health in Ghana. International Journal of Maternal and Child Health and AIDS, 10(1), 98.  Seidu, A. A., Okyere, J., Budu, E., Duah, H. O., & Ahinkorah, B. O. (2022). Inequalities in antenatal care in Ghana, 1998–2014. BMC Pregnancy and Childbirth, 22(1), 478.  Saapiire, F., Dogoli, R., & Mahama, S. (2022). Adequacy of antenatal care services utilisation and its effect on anaemia in pregnancy. Journal of Nutritional Science, 11, e80.  Ameyaw, E. K., Dickson, K. S., & Adde, K. S. (2021). Are Ghanaian women meeting the WHO recommended maternal healthcare (MCH) utilisation? Evidence from a national survey. BMC Pregnancy and Childbirth, 21, 1-9.  Azaare, J., Aninanya, G. A., Abdulai, K., Adane, F., Bio, R. B., & Hushie, M. (2024). Maternal health care utilization following the implementation of the free maternal health care policy in Ghana: analysis of Ghana demographic and health surveys 2008–2014. BMC Health Services Research, 24(1), 207.  Abuosi, A. A., Anaba, E. A., Daniels, A. A., Baku, A. A. A., & Akazili, J. (2024). Determinants of early antenatal care visits among women of reproductive age in Ghana: evidence from the recent Maternal Health Survey. BMC Pregnancy and Childbirth, 24(1), 309.  Andegiorgish, A. K., Elhoumed, M., Qi, Q., Zhu, Z., & Zeng, L. (2022). Determinants of antenatal care use in nine sub-Saharan African countries: a statistical analysis of cross-sectional data from Demographic and Health Surveys. BMJ open, 12(2), e051675.  Appiah, F., Salihu, T., Fenteng, J. O. D., Darteh, A. O., Djan, E. T., Takyi, M., ... & Ameyaw, E. K. (2021). Factors influencing early postnatal care utilisation among women: Evidence from the 2014 Ghana Demographic and Health Survey. PloS one, 16(4), e0249480.  Kumbeni, M. T., Apanga, P. A., Yeboah, E. O., Kolog, J. T., & Awuni, B. (2021). The relationship between time spent during the first ANC contact, home visits and adherence to ANC contacts in Ghana. Global health action, 14(1), 1956754. **Global, LMICs, SSA & West-africa:** not searched **Ongoing studies:** Ayelepuni, A., Gnimatin, J. P., & Adokiya, M. N. (2022). Utilisation of antenatal care and skilled delivery services among mothers in Nanton District of Northern Ghana: a mixed-method study protocol. BMJ open, 12(12), e066118.  **Evidence from other sources:** Ghana. Ghana Statistical Service. (2018). Ghana Multiple Indicator Cluster Survey 2017/18: Survey Findings Report. Ghana Statistical Service. **Ghana Demographic and Health Survey** 2022 ( https://dhsprogram.com/pubs/pdf/FR387/FR387.pdf ) | ANC attendance in Ghana is relatively well-documented, by the GHS/Ghana Statistical Service, as well as by researchers. These sources provide detailed reporting on the attendance of different sub-populations and in different time periods. Therefore, this question is deemed ineligible for inclusion in the research agenda.   The majority of the sources find insufficient ANC attendance and therefore express the need for more research on ways to improve ANC access/attendance of the subpopulations that currently have a relatively low ANC attendance. This seems to be a more relevant question to include in this area of interest for survey respondents: please see the question below (D_04A). | Broadly answered |
| D_04A | What are strategies to improve antenatal care attendance in Ghana?  (Domains: vulnerable groups (adolescents, inhabitants of rural areas/informal settlements, low socioeconomic status). role of religion/polygyny, health insurance coverage, innovative measures, male participation) | See previous question | **Pubmed:**  NA  **Cochrane:**  NA  **Scopus:**  NA | **Question retrieved from recommendations in literature found when searching D_04 --> research need expressed by:** Bassoumah, B., Adam, A. M., & Adokiya, M. N. (2021). Challenges to the utilization of Community-based Health Planning and Services: the views of stakeholders in Yendi Municipality, Ghana. BMC Health Services Research, 21, 1-9.  Rahman, M., Hossain, F., Islam, R., Jung, J., Mahmud, S. R., & Hashizume, M. (2022). Equity in antenatal care visits among adolescent mothers: An analysis of 54 country levels trend and projection of coverage from 2000 to 2030. Journal of Global Health, 12.  Duodu, P. A., Bayuo, J., Mensah, J. A., Aduse-Poku, L., Arthur-Holmes, F., Dzomeku, V. M., ... & Nutor, J. J. (2022). Trends in antenatal care visits and associated factors in Ghana from 2006 to 2018. BMC Pregnancy and childbirth, 22(1), 59.  Anarwat, S. G., Salifu, M., & Akuriba, M. A. (2021). Equity and access to maternal and child health services in Ghana a cross-sectional study. BMC Health Services Research, 21, 1-12.  Anaba, E. A., Alor, S. K., & Badzi, C. D. (2022). Utilization of antenatal care among adolescent and young mothers in Ghana; analysis of the 2017/2018 multiple indicator cluster survey. BMC Pregnancy and Childbirth, 22(1), 544.  Seidu, A. A., Okyere, J., Budu, E., Duah, H. O., & Ahinkorah, B. O. (2022). Inequalities in antenatal care in Ghana, 1998–2014. BMC Pregnancy and Childbirth, 22(1), 478.  Gyan, E. K., Dugle, G., & Abiiro, G. A. (2022). Promoting male participation in maternal healthcare in the Jaman North District in Ghana: Strategies and implementation challenges. The International Journal of Health Planning and Management, 37(3), 1754-1768.  Yunitasari, E., DU, W. P., NK, A. A., Sudarsiwi, N. P., & Ramoo, V. (2023). Analysis of factors that affect the utilization of antenatal care in developing countries: A systematic review. JPMA. The Journal of the Pakistan Medical Association, 73(2), S162-S169.  Ameyaw, E. K., Dickson, K. S., & Adde, K. S. (2021). Are Ghanaian women meeting the WHO recommended maternal healthcare (MCH) utilisation? Evidence from a national survey. BMC Pregnancy and Childbirth, 21, 1-9.  Abuosi, A. A., Anaba, E. A., Daniels, A. A., Baku, A. A. A., & Akazili, J. (2024). Determinants of early antenatal care visits among women of reproductive age in Ghana: evidence from the recent Maternal Health Survey. BMC Pregnancy and Childbirth, 24(1), 309.  Yunitasari, E., DU, W. P., NK, A. A., Sudarsiwi, N. P., & Ramoo, V. (2023). Analysis of factors that affect the utilization of antenatal care in developing countries: A systematic review. JPMA. The Journal of the Pakistan Medical Association, 73(2), S162-S169.  Andegiorgish, A. K., Elhoumed, M., Qi, Q., Zhu, Z., & Zeng, L. (2022). Determinants of antenatal care use in nine sub-Saharan African countries: a statistical analysis of cross-sectional data from Demographic and Health Surveys. BMJ open, 12(2), e051675.  Appiah, F., Salihu, T., Fenteng, J. O. D., Darteh, A. O., Djan, E. T., Takyi, M., ... & Ameyaw, E. K. (2021). Factors influencing early postnatal care utilisation among women: Evidence from the 2014 Ghana Demographic and Health Survey. PloS one, 16(4), e0249480.  Kumbeni, M. T., Alem, J. N., Ziba, F. A., Afaya, A., & Apanga, P. A. (2024). The practice of polygyny on the utilisation of reproductive health services among married women in Ghana. Journal of Biosocial Science, 1-12.  Ameyaw, E. K., Ahinkorah, B. O., Baatiema, L., & Seidu, A. A. (2021). Is the National Health Insurance Scheme helping pregnant women in accessing health services? Analysis of the 2014 Ghana demographic and Health survey. BMC Pregnancy and Childbirth, 21, 1-8.  Dwomoh, D., Iddi, S., Afagbedzi, S. K., Tejedor-Garavito, N., Dotse-Gborgbortsi, W., Wright, J., ... & Nilsen, K. (2023). Impact of Urban Slum Residence on Coverage of Maternal, Neonatal, and Child Health Service Indicators in the Greater Accra Region of Ghana: an Ecological Time-Series Analysis, 2018–2021. Journal of Urban Health, 1-12.  Enos, J. Y., Amoako, R. D., & Doku, I. K. (2021). Utilization, predictors and gaps in the continuum of care for maternal and newborn health in Ghana. International Journal of Maternal and Child Health and AIDS, 10(1), 98. **Evidence: Ghana:** Kofinti, R. E., Asmah, E. E., & Ameyaw, E. K. (2022). Comparative study of the effect of National Health Insurance Scheme on use of delivery and antenatal care services between rural and urban women in Ghana. Health Economics Review, 12(1), 13.  Morgan, A. K., Awafo, B. A., Quartey, T., & Cobbold, J. (2022). Husbands’ involvement in antenatal-related care in the Bosomtwe District of Ghana: inquiry into the facilitators and barriers. Reproductive Health, 19(1), 1-14.  Zielinski, R., Kukula, V., Apetorgbor, V., Awini, E., Moyer, C., Badu-Gyan, G., ... & Lori, J. (2023). “With group antenatal care, pregnant women know they are not alone”: The process evaluation of a group antenatal care intervention in Ghana. Plos one, 18(11), e0291855.  Lanyo, T. N., Zielinski, R., Kukula, V. A., Apetorgbor, V. E., Ghosh, B., Lockhart, N. A., & Lori, J. R. (2023). Improving respectful maternity care through group antenatal care: findings from a cluster randomized controlled trial. | Need for research was expressed widely by literature reviewed for question D_04. | Broadly unanswered |
| D_05 | Which myths exist in Ghana regarding the diagnosis of HDP? | HDP synonyms*  AND  (Diagnosis [MeSH] OR diagnos*[Title/Abstract] OR identificat*[Title/Abstract])  AND  (myth*[Title/Abstract] OR Misconception*[Title/Abstract] OR belief*[Title/Abstract] OR misinformation[Title/Abstract] OR attribute* [Title/Abstract] OR sociocultural factors [Title/Abstract] OR socio-cultural factors [Title/Abstract] OR religious factors [Title/Abstract] OR spiritual* [Title/Abstract] OR traditional [Title/Abstract])  AND  Location synonyms* | **Pubmed:**  June 11th, 2024  3 (Ghana 2019-2024, all study types)  3 (west Africa 2019-2024, all study types)  7 (SSA 2019-2024, all study types)  **Cochrane:**  June 11th, 2024  0 (Ghana 2019-2024, all study types)  2 (west Africa 2019-2024, all study types)  6 (SSA 2019-2024, all study types)  **Scopus:**  June 18th, 2024  2 (Ghana 2019-2024, all study types)  27 (west Africa 2019-2024, all study types)  54 (SSA 2019-2024, all study types) | **Reviews:** none **Single studies: Ghana:** Tamma, E., Adu-Bonsaffoh, K., Nwameme, A., Dako-Gyeke, P., Srofenyoh, E., & Browne, J. (2023). Maternal hypertensive mother’s knowledge, attitudes and misconceptions on hypertension in pregnancy: A multi-center qualitative study in Ghana. PLOS Global Public Health, 3(1), e0001456. **West-africa:** Aliyu, R. Y. (2021). Evil spirits and martyrdom as perceptions of pre-eclampsia among traditional birth attendants in Kano, north-west Nigeria. Health Communication and Disease in Africa: Beliefs, Traditions and Stigma, 231-246. **SSA:** Robbins, T., Hanlon, C., Kelly, A. H., Gidiri, M. F., Musiyiwa, M., Silverio, S. A., ... & Sandall, J. (2021). Pills and prayers: a comparative qualitative study of community conceptualisations of pre-eclampsia and pluralistic care in Ethiopia, Haiti and Zimbabwe. BMC Pregnancy and Childbirth, 21, 1-14.  Namagembe, I., Karavadra, B., Kazibwe, L., Rujumba, J., Kiwanuka, N., Smith, B., ... & Aiken, C. E. (2024). Implementation challenges in preeclampsia care: perspectives from health care professionals in urban Uganda. AJOG Global Reports, 4(2), 100348.  Nabulo, H., Ruzaaza, G., Mugabi, F., & Bajunirwe, F. (2021). Perceptions on preeclampsia and eclampsia among senior, older women, in rural Southwestern Uganda. Journal of global health reports, 5. **Global & LMICs:** not searched because findings wouldn't change the judgment | There is an evident knowledge gap for this research question. There are only a few studies that address this topic, of which one in Ghana, and no reviews exist. From the results of these few studies, it becomes clear that many myths exist about the diagnosis HDP (as well as its treatment, causes and risk factors). Examples are TBAs that disregard the signs and symptoms of HDP as not important and patients who do not believe the diagnosis when set by HCP. This emphasizes that there is still a lot to discover regarding this topic. | Broadly unanswered |
| D_06 | What are the existing inequities in screening, diagnostic criteria, timing and accuracy of HDP diagnosis in Ghana, and how can these be improved?  (Domains: vulnerable groups (adolescents, minority ethnic groups, migrants, non-attenders of ANC), regional differences, rural dwellers, healthcare facility level) | (HDP synonyms*  AND  (Diagnosis [MeSH] OR diagnos*[Title/Abstract] OR identificat*[Title/Abstract] OR Detect*[Title/Abstract])  AND  (Healthcare Disparities[MeSH] OR Health Inequities[MeSH] OR Minority Health[MeSH] OR Socioeconomic status[MeSH] OR Vulnerable populations[MeSH] OR minority groups[MeSH] OR migrants[MeSH] OR adolescents[MeSH] OR difference*[Title/Abstract] OR disparit*[Title/Abstract] OR equit*[Title/Abstract] OR inequit*[Title/Abstract] OR inequalit*[Title/Abstract] OR region*[Title/Abstract] OR geographic*[Title/Abstract] OR local*[Title/Abstract] OR district*[Title/Abstract] OR county*[Title/Abstract] OR counties[Title/Abstract] OR rural*[Title/Abstract] OR remote*[Title/Abstract] OR urban[Title/Abstract] OR periurban[Title/Abstract] OR peri-urban[Title/Abstract] OR village*[Title/Abstract] OR primary health*[Title/Abstract] secondary health*[Title/Abstract] tertiary health*[Title/Abstract] OR primary care[Title/Abstract] secondary care[Title/Abstract] tertiary care*[Title/Abstract] OR hospital*[Title/Abstract] OR specialized[Title/Abstract] OR private[Title/Abstract] OR polyclinic*[Title/Abstract] OR clinic*[Title/Abstract] OR health unit*[Title/Abstract] OR health post*[Title/Abstract] OR health cent*[Title/Abstract] OR medical cent*[Title/Abstract] OR health facilit*[Title/Abstract] OR healthcare unit*[Title/Abstract] OR healthcare post*[Title/Abstract] OR healthcare cent*[Title/Abstract] OR healthcare facilit*[Title/Abstract] OR CHPS[Title/Abstract] OR adolescent*[Title/Abstract] OR young*[Title/Abstract] OR teenage*[Title/Abstract] OR minority group*[Title/Abstract] OR minority ethnic*[Title/Abstract] OR migrant*[Title/Abstract] OR refugee*[Title/Abstract] OR ANC non-attend*[Title/Abstract]) AND Location synonyms*) **OR** ((Prenatal Care[MeSH] OR Maternal Health Services[MeSH] OR antenatal[Title/Abstract] OR ANC[Title/Abstract] OR prenatal*[Title/Abstract] OR pregnancy care[Title/Abstract] OR maternal care[Title/Abstract] OR maternity care[Title/Abstract] OR maternal health service*[Title/Abstract]) AND  (Healthcare Disparities[MeSH] OR Health Inequities[MeSH] OR Minority Health[MeSH] OR Socioeconomic status[MeSH] OR Vulnerable populations[MeSH] OR minority groups[MeSH] OR migrants[MeSH] OR adolescents[MeSH] OR difference*[Title/Abstract] OR disparit*[Title/Abstract] OR equit*[Title/Abstract] OR inequit*[Title/Abstract] OR inequalit*[Title/Abstract] OR region*[Title/Abstract] OR geographic*[Title/Abstract] OR local*[Title/Abstract] OR district*[Title/Abstract] OR county*[Title/Abstract] OR counties[Title/Abstract] OR rural*[Title/Abstract] OR remote*[Title/Abstract] OR urban[Title/Abstract] OR periurban[Title/Abstract] OR peri-urban[Title/Abstract] OR village*[Title/Abstract] OR primary health*[Title/Abstract] secondary health*[Title/Abstract] tertiary health*[Title/Abstract] OR primary care[Title/Abstract] secondary care[Title/Abstract] tertiary care*[Title/Abstract] OR hospital*[Title/Abstract] OR specialized[Title/Abstract] OR private[Title/Abstract] OR polyclinic*[Title/Abstract] OR clinic*[Title/Abstract] OR health unit*[Title/Abstract] OR health post*[Title/Abstract] OR health cent*[Title/Abstract] OR medical cent*[Title/Abstract] OR health facilit*[Title/Abstract] OR healthcare unit*[Title/Abstract] OR healthcare post*[Title/Abstract] OR healthcare cent*[Title/Abstract] OR healthcare facilit*[Title/Abstract] OR CHPS[Title/Abstract] OR adolescent*[Title/Abstract] OR young*[Title/Abstract] OR teenage*[Title/Abstract] OR minority group*[Title/Abstract] OR minority ethnic*[Title/Abstract] OR migrant*[Title/Abstract] OR refugee*[Title/Abstract] OR ANC non-attend*[Title/Abstract]) AND Location synonyms) | **Pubmed:**  June 19th, 2024  250 (Ghana 2021-2024, all study types)  6 (Ghana 2019-2024, reviews)  **Cochrane:**  June 19th, 2024  54 (Ghana 2021-2024, all study types)  **Scopus:**  June 19th, 2024  697 (Ghana 2021-2024, all study types) --> too much to screen  31 (Ghana 2021-2024, reviews) | **Reviews: Ghana:** none **Single studies: Ghana:** Boachie-Ansah, P., Anto, B. P., Marfo, A. F. A., Dassah, E. T., Mozu, I. E., & Attakora, J. (2023). Quality of antenatal care and outcomes of Hypertensive Disorders in Pregnancy among antenatal attendees: A comparison of urban and periurban health facilities in Ghana. Plos one, 18(12), e0294327.  Adu-Bonsaffoh, K., Tamma, E., Nwameme, A., Dako-Gyeke, P., Srofenyoh, E., Ansah, E. K., ... & Browne, J. L. (2023). Provision and experience of care among women with hypertension in pregnancy: a multi-center qualitative study in Ghana. Reproductive Health, 20(1), 49.  Lattof, S. R., Maliqi, B., Yaqub, N., Asiedu, E. K., Ukaire, B., Ojo, O., ... & George, J. (2023). Engaging the private sector to deliver quality maternal and newborn health services for universal health coverage: lessons from policy dialogues. BMJ Global Health, 8(Suppl 5), e008939.  Amoro, V. A., Abiiro, G. A., & Alatinga, K. A. (2021). Bypassing primary healthcare facilities for maternal healthcare in North West Ghana: socio-economic correlates and financial implications. BMC Health Services Research, 21(1), 545.  Anarwat, S. G., Salifu, M., & Akuriba, M. A. (2021). Equity and access to maternal and child health services in Ghana a cross-sectional study. BMC Health Services Research, 21, 1-12.  Kanmiki, E. W., Mamun, A. A., Phillips, J. F., & O'Flaherty, M. J. (2023). Equity in maternal healthcare utilisation in Ghana: Do community‐based primary health care programmes matter?. Tropical Medicine & International Health, 28(5), 409-418.  Yambah, J. K., Mensah, K. A., Kuunibe, N., Laar, K., Atinga, R. A., Ofori Boateng, M., ... & Quentin, W. (2022). The effect of the capitation policy withdrawal on maternal health service provision in Ashanti Region, Ghana: an interrupted time series analysis. Global Health Research and Policy, 7(1), 38.  Madaj, B., Gopalakrishnan, S., Quach, A., Filiaci, S., Traore, A., Bakusa, D., ... & van den Broek, N. (2022). Where is the ‘C’in antenatal care and postnatal care: A multi‐country survey of availability of antenatal and postnatal care in low‐and middle‐income settings. BJOG: An International Journal of Obstetrics & Gynaecology, 129(9), 1546-1557.  Kunjumen, T., Okech, M., Deki, Asamani, J. A., Mohamed, N., & Nuruzzaman, M. (2022). Multi-country case studies on planning RMNCH services using WISN methodology: Bangladesh, Ghana, Kenya, Sultanate of Oman and Papua New Guinea. Human Resources for Health, 19(Suppl 1), 155.  Dzomeku, V. M., Mensah, A. B. B., Nakua, E. K., Agbadi, P., Okyere, J., Donkor, P., & Lori, J. R. (2022). Promoting respectful maternity care: challenges and prospects from the perspectives of midwives at a tertiary health facility in Ghana. BMC Pregnancy and Childbirth, 22(1), 451.  Afulani, P. A., Okiring, J., Aborigo, R. A., Nutor, J. J., Kuwolamo, I., Dorzie, J. B. K., ... & Mendes, W. B. (2023). Provider implicit and explicit bias in person-centered maternity care: a cross-sectional study with maternity providers in Northern Ghana. BMC health services research, 23(1), 254.  Bassoumah, B., Adam, A. M., & Adokiya, M. N. (2021). Challenges to the utilization of Community-based Health Planning and Services: the views of stakeholders in Yendi Municipality, Ghana. BMC Health Services Research, 21, 1-9.  Dickson, K. S., Boateng, E. N., Adde, K. S., Ameyaw, E. K., & Munro-Kramer, M. L. (2023). Non-adherence to WHO’s recommended 8-contact model: geospatial analysis of the 2017 Maternal Health Survey. BMC Pregnancy and Childbirth, 23(1), 192.  Annan, R. A., Gyimah, L. A., Apprey, C., Asamoah-Boakye, O., Aduku, L. N. E., Azanu, W., ... & Edusei, A. K. (2021). Predictors of adverse birth outcomes among pregnant adolescents in Ashanti Region, Ghana. Journal of Nutritional Science, 10, e67.  Ekholuenetale, M., Nzoputam, C. I., & Barrow, A. (2021). Prevalence and socioeconomic inequalities in eight or more antenatal care contacts in Ghana: findings from 2019 population-based data. International journal of women's health, 349-360.  Ameyaw, E. K., Ahinkorah, B. O., Baatiema, L., & Seidu, A. A. (2021). Is the National Health Insurance Scheme helping pregnant women in accessing health services? Analysis of the 2014 Ghana demographic and Health survey. BMC Pregnancy and Childbirth, 21, 1-8.  Andegiorgish, A. K., Elhoumed, M., Qi, Q., Zhu, Z., & Zeng, L. (2022). Determinants of antenatal care use in nine sub-Saharan African countries: a statistical analysis of cross-sectional data from Demographic and Health Surveys. BMJ open, 12(2), e051675.  Asante, H. A., Boyetey, S. T., Essaw, E., Nyame, C. A., Mante, B., Dziwornu, L., & Okyere, P. (2024). Prevalence and factors associated with antepartum depression among adolescent women in the assin north district of Ghana: a cross-sectional study. BMC women's health, 24(1), 276.  Annor, C., Alatinga, K. A., & Abiiro, G. A. (2021). Is the presence of an adolescent reproductive health corner associated with adolescent knowledge and use of reproductive health services in Ghana?. Sexual & Reproductive Healthcare, 27, 100583.  Abuosi, A. A., Anaba, E. A., Daniels, A. A., Baku, A. A. A., & Akazili, J. (2024). Determinants of early antenatal care visits among women of reproductive age in Ghana: evidence from the recent Maternal Health Survey. BMC Pregnancy and Childbirth, 24(1), 309.  Ameyaw, E. K., Dickson, K. S., & Adde, K. S. (2021). Are Ghanaian women meeting the WHO recommended maternal healthcare (MCH) utilisation? Evidence from a national survey. BMC Pregnancy and Childbirth, 21, 1-9.  Adatara, P., Amooba, P. A., Afaya, A., Salia, S. M., Avane, M. A., Kuug, A., ... & Atachie, C. (2021). Challenges experienced by midwives working in rural communities in the Upper East Region of Ghana: a qualitative study. BMC Pregnancy and Childbirth, 21, 1-8.  Dwomoh, D., Iddi, S., Afagbedzi, S. K., Tejedor-Garavito, N., Dotse-Gborgbortsi, W., Wright, J., ... & Nilsen, K. (2023). Impact of Urban Slum Residence on Coverage of Maternal, Neonatal, and Child Health Service Indicators in the Greater Accra Region of Ghana: an Ecological Time-Series Analysis, 2018–2021. Journal of Urban Health, 1-12.  Lori, J. R., Kukula, V. A., Liu, L., Apetorgbor, V. E., Ghosh, B., Awini, E., ... & Williams, J. (2024). Improving health literacy through group antenatal care: results from a cluster randomized controlled trial in Ghana. BMC Pregnancy and Childbirth, 24(1), 37.  Barbi, L., Cham, M., Ame-Bruce, E., & Lazzerini, M. (2021). Socio-cultural factors influencing the decision of women to seek care during pregnancy and delivery: A qualitative study in South Tongu District, Ghana. Global public health, 16(4), 532-545.  Olorunsaiye, C. Z., Brunner Huber, L. R., Laditka, S. B., Kulkarni, S. J., & Boyd, S. (2021). Individual and community socioeconomic factors related to the quality of antenatal care: a multilevel analysis of West and Central Africa. Women & Health, 61(1), 15-26.  Anaba, E. A., & Afaya, A. (2022). Correlates of late initiation and underutilisation of the recommended eight or more antenatal care visits among women of reproductive age: insights from the 2019 Ghana Malaria Indicator Survey. BMJ open, 12(7), e058693.  Dotse-Gborgbortsi, W., Nilsen, K., Ofosu, A., Matthews, Z., Tejedor-Garavito, N., Wright, J., & Tatem, A. J. (2022). Distance is “a big problem”: a geographic analysis of reported and modelled proximity to maternal health services in Ghana. BMC Pregnancy and Childbirth, 22(1), 672.  Kofinti, R. E., Asmah, E. E., & Ameyaw, E. K. (2022). Comparative study of the effect of National Health Insurance Scheme on use of delivery and antenatal care services between rural and urban women in Ghana. Health Economics Review, 12(1), 13.  Anaba, E. A., Alor, S. K., & Badzi, C. D. (2022). Utilization of antenatal care among adolescent and young mothers in Ghana; analysis of the 2017/2018 multiple indicator cluster survey. BMC Pregnancy and Childbirth, 22(1), 544.  Sumankuuro, J., Domapielle, M. K., & Derbile, E. K. (2022). The what's, where's and why's of miscarriage: evidence from the 2017 Ghana Maternal Health Survey. Public Health, 213, 34-46.  Rahman, M., Hossain, F., Islam, R., Jung, J., Mahmud, S. R., & Hashizume, M. (2022). Equity in antenatal care visits among adolescent mothers: An analysis of 54 country levels trend and projection of coverage from 2000 to 2030. Journal of Global Health, 12.  Lanyo, T. N., Zielinski, R., Kukula, V. A., Apetorgbor, V. E., Ghosh, B., Lockhart, N. A., & Lori, J. R. (2023). Improving respectful maternity care through group antenatal care: findings from a cluster randomized controlled trial.  Seidu, A. A., Okyere, J., Budu, E., Duah, H. O., & Ahinkorah, B. O. (2022). Inequalities in antenatal care in Ghana, 1998–2014. BMC Pregnancy and Childbirth, 22(1), 478.  Duodu, P. A., Bayuo, J., Mensah, J. A., Aduse-Poku, L., Arthur-Holmes, F., Dzomeku, V. M., ... & Nutor, J. J. (2022). Trends in antenatal care visits and associated factors in Ghana from 2006 to 2018. BMC Pregnancy and childbirth, 22(1), 59.  Kassim, A. B., Newton, S. K., Dormechele, W., Rahinatu, B. B., Yanbom, C. T., Yankson, I. K., & Otupiri, E. (2023). Effects of a community-level intervention on maternal health care utilization in a resource-poor setting of Northern Ghana. BMC Public Health, 23(1), 1491.Novignon, J., Atakorah, Y. B., & Chijere Chirwa, G. (2021). Exemption for the poor or the rich? An assessment of socioeconomic inequalities in Ghana’s national health insurance exemption policies. Health Policy and Planning, 36(7), 1058-1066.  **Ongoing studies:** Ganle, J. K., Ofori, C., & Dery, S. (2021). Testing the effect of an integrated-intervention to promote access to sexual and reproductive healthcare and rights among women with disabilities in Ghana: a quasi-experimental study protocol. Reproductive Health, 18, 1-11.  **Global, LMICs, SSA & West-africa:** not searched **Ghana demographic and health survey 2022:** includes the percentages of ANC attendance across the different regions, ages, education, rural/urban residence and wealth, but not the quality of provided screening/diagnosis. One key overall finding: "Nearly all women (98%) reported receiving antenatal care from a skilled provider for their most recent live birth or stillbirth in the 2 years preceding the survey." | Studies in Ghana report many inequities in maternal health service use and quality. Most of the research is focused on ANC, and specifically the access to ANC: age, (partner) education, wealth index, religion, region, rural/urban/slum residence, enrollment in NHIS, marital status, lacking decision-making power, parity and distance to health facilities are all significantly associated with level ANC attendance. Solutions such as reproductive health corners for adolescents, improving health literacy, using NHIS as social equalizer, targeted ANC at small distance, group ANC and participatory sessions led by community members can improve ANC attendance by vulnerable groups. The quality of ANC is lower for residents in poorer communities and midwives also report facing challenges in providing adequate care there.  Most of the evidence about regional/facility differences is regarding facility delivery, or the difference between ANC attendance and SBA. Reviews nor studies about the differences in HDP diagnostics are available. For ANC, few studies are available which suggest important inequities in the resources and services available for different levels, locations, and differences in respectfulness of midwives.  To summarize: many studies have been performed that contribute knowledge about this broad question in Ghana. However, reviews are lacking, and most of the research is about use of ANC and SBA, rather than the quality thereof. Therefore, there is still a knowledge gap for this question. However, the existing evidence already shows that there are clearly inequities, so I would suggest to add: "[...], and how can this be improved?"  Lastly, the large number of studies without extensive reviews on this topic calls for more systematic review in this area. We should report and recommend this separately. | Partly unanswered |
| D_07 | What is the best timing for the diagnosis of HDP? | HDP synonyms*  AND  (Diagnosis [MeSH] OR Pregnancy Complications / diagnosis*[MeSH] OR diagnos*[Title/Abstract] OR identificat*[Title/Abstract] OR Detect*[Title/Abstract])  AND  SSA synonyms OR LMIC synonyms* | **Pubmed:**  June 15th, 2024  64 (SSA+LMIC 2021-2024, reviews)  440 (global 2021-2024, reviews)  **Cochrane:**  June 15th, 2024  2 (SSA+LMIC 2021-2024, reviews)  **Scopus:**  N/A | **Reviews: Global:** 440 results = not feasible to screen --> searched for LMIC OR SSA **SSA/LMICs:** Medjedovic, E., Kurjak, A., Stanojević, M., & Begic, E. (2023). Pre-eclampsia and maternal health through the prism of low-income countries. Journal of Perinatal Medicine, 51(2), 261-268.  Ngene, N. C., & Moodley, J. (2024). Preventing maternal morbidity and mortality from preeclampsia and eclampsia particularly in low-and middle-income countries. Best Practice & Research Clinical Obstetrics & Gynaecology, 102473.  Oliveira, L. G. D., Diniz, A. L. D., Prado, C. A. D. C., Cunha Filho, E. V. D., Souza, F. L. P. D., Korkes, H. A., ... & Peraçoli, J. C. (2021). Pre-eclampsia: Universal Screening or Universal Prevention for Low andMiddle-Income Settings?. Revista Brasileira de Ginecologia e Obstetrícia, 43(01), 61-65.  Mayrink, J., & Reis, Z. S. N. (2024). Pre‐eclampsia in low and middle‐income settings: What are the barriers to improving perinatal outcomes and evidence‐based recommendations?. International Journal of Gynecology & Obstetrics, 164(1), 33-39.  Smith, V., Kenny, L. C., Sandall, J., Devane, D., & Noonan, M. (2021). Physiological track‐and‐trigger/early warning systems for use in maternity care. Cochrane Database of Systematic Reviews, (9).  Chappell, L. C., Cluver, C. A., & Tong, S. (2021). Pre-eclampsia. The Lancet, 398(10297), 341-354.  Bartal, M. F., & Sibai, B. M. (2022). Eclampsia in the 21st century. American journal of obstetrics and gynecology, 226(2), S1237-S1253.  **GHS Standard Treatment Guidelines:** No information about timing of diagnosis **ISSHP Guideline:** page 155: "13. At minimum, women should be screened for clinical risk markers of pre-eclampsia risk at antenatal care booking (GPP). 14. If testing is available, after appropriate counselling, women should be screened at 11–14 weeks for preterm pre-eclampsia risk." | The large number of reviews about this topic, the ISSHP guideline and the reviews in SSA/LMICs all find/emphasize the importance of diagnosing HDP as early as possible, as this helps early initiation of treatment and thereby prevention of morbidity and mortality. Which timing is feasible in a specific context depends on the available resources, which is covered by another question in this category (D_09). | Broadly answered |
| D_08 | What are the causes of delay in HDP diagnosis in Ghana? | HDP synonyms*  AND  (Delayed diagnosis [MeSH] OR delayed diagnos*[Title/Abstract] OR diagnostic delay*[Title/Abstract] OR late diagnos*[Title/Abstract] OR delayed detect*[Title/Abstract] OR late detect*[Title/Abstract] OR delayed identif*[Title/Abstract] OR late identif*[Title/Abstract])  AND  Location synonyms* | **Pubmed:**  June 12th, 2024  1 (Ghana 2019-2024, all study types)  2 (west Africa 2019-2024, all study types)  4 (SSA 2019-2024, all study types)  2 (LIMC 2019-2024, all study types)  **Cochrane:**  June 12th, 2024  4 (Ghana 2019-2024, all study types)  5 (west Africa 2019-2024, all study types)  15 (SSA 2019-2024, all study types)  **Scopus:**  N/A | **Reviews:** none **Single studies: Ghana:** Atluri, N., Beyuo, T. K., Oppong, S. A., Compton, S. D., Moyer, C. A., & Lawrence, E. R. (2023). Benefits and barriers of home blood pressure monitoring in pregnancy: perspectives of obstetric doctors from a Ghanaian tertiary hospital. BMC Pregnancy and Childbirth, 23(1), 42. **West-africa:** NA **SSA:** Ngwira, M. M., Gadama, L. A., Shanmugalingam, R., Makris, A., & Hennessy, A. (2024). Patients and health care workers perceived challenges in managing preeclampsia, in Malawi. Pregnancy Hypertension, 35, 61-65. **LMICs:** none **Global:** not searched | There is a clear lack of knowledge in this area, seeing that there are no reviews and only two studies available. These mention late ANC presentation, lack of essential resources such as sphygmomanometers, low skills of staff, quality and frequency of BP monitoring as reasons for delayed diagnosis. These results show the widespread issues and call for more research on this topic. | Broadly unanswered |
| D_09 | What are the possibilities for early diagnosis of HDP in Ghana (before presence of symptoms)? | HDP synonyms*  AND  (Early Diagnosis[MeSH] OR Early diagnos*[Title/Abstract] OR earlier diagnos*[Title/Abstract] OR early detect*[Title/Abstract] OR earlier detect*[Title/Abstract] OR early identif*[Title/Abstract] OR earlier identif*[Title/Abstract] OR before symptom onset[Title/Abstract] OR before onset[Title/Abstract] OR before manifest*[Title/Abstract] OR prior to symptom*[Title/Abstract] OR prior to manifest*[Title/Abstract] OR prior to onset[Title/Abstract] OR (first trimester[Title/Abstract] AND (Diagnosis [MeSH] OR diagnos*[Title/Abstract])))  AND  Location synonyms* | **Pubmed:**  June 12th, 2024  224 (global 2021-2024, reviews)  7 (Ghana 2019-2024, all study types)  **Cochrane:**  June 12th, 2024  10 (global 2021-2024, reviews)  **Scopus:**  N/A | **Reviews: Global:** Subramanian, A., Weiss, D., Nyhan, K., Dewan, A., & Jukic, A. M. Z. (2023). Circulating miRNAs in the first trimester and pregnancy complications: a systematic review. Epigenetics, 18(1), 2152615.  Woldeamanuel, G. G., Tlaye, K. G., Wu, L., Poon, L. C., & Wang, C. C. (2023). Platelet count in preeclampsia: a systematic review and meta-analysis. American Journal of Obstetrics & Gynecology MFM, 100979.  Scott, G., Gillon, T. E., Pels, A., von Dadelszen, P., & Magee, L. A. (2022). Guidelines—similarities and dissimilarities: a systematic review of international clinical practice guidelines for pregnancy hypertension. American Journal of Obstetrics and Gynecology, 226(2), S1222-S1236.  Han, L., Holland, O. J., Da Silva Costa, F., & Perkins, A. V. (2023). Potential biomarkers for late-onset and term preeclampsia: A scoping review. Frontiers in Physiology, 14, 1143543.  Marrufo-Gallegos, K. C., Villafán-Bernal, J. R., Espino-y-Sosa, S., Estrada-Gutierrez, G., Guzmán-Guzmán, I. P., Martinez-Portilla, R. J., & Torres-Torres, J. (2023). Influential Serum Kinases (Non-sFlt-1) and Phosphatases in Preeclampsia—Systematic Review and Metanalysis. International Journal of Molecular Sciences, 24(16), 12842.  Su, S., Yang, F., Zhong, L., & Pang, L. (2021). Circulating noncoding RNAs as early predictive biomarkers in preeclampsia: a diagnostic meta-analysis. Reproductive Biology and Endocrinology, 19, 1-10.  Hamadeh, R., Mohsen, A., Kobeissy, F., Karouni, A., & Akoum, H. (2021). C-reactive protein for prediction or early detection of pre-eclampsia: a systematic review. Gynecologic and obstetric investigation, 86(1-2), 13-26.  Yeh, P. T., Rhee, D. K., Kennedy, C. E., Zera, C. A., Lucido, B., Tunçalp, Ö., ... & Narasimhan, M. (2022). Self-monitoring of blood pressure among women with hypertensive disorders of pregnancy: a systematic review. BMC pregnancy and childbirth, 22(1), 454.  Yuan, Y., He, W., Fan, X., Liang, J., Cao, Z., & Li, L. (2023). Serum afamin levels in predicting gestational diabetes mellitus and preeclampsia: A systematic review and meta-analysis. Frontiers in endocrinology, 14, 1157114.  Zhang, X., Huangfu, Z., Shi, F., & Xiao, Z. (2021). Predictive performance of serum β-hCG MoM levels for preeclampsia screening: a meta-analysis. Frontiers in Endocrinology, 12, 619530.  Asyura, M. M. A. Z., Komariah, M., Amirah, S., Faisal, E. G., Maulana, S., Platini, H., & Pahria, T. (2023). Analysis of varying microRNAs as a novel biomarker for early diagnosis of preeclampsia: A scoping systematic review of the observational study. International Journal of Preventive Medicine, 14(1), 36.  Wu, Y., Liu, Y., & Ding, Y. (2021). Predictive performance of placental protein 13 for screening preeclampsia in the first trimester: a systematic review and meta-analysis. Frontiers in medicine, 8, 756383.  MacDonald, T. M., Walker, S. P., Hannan, N. J., Tong, S., & Tu'uhevaha, J. (2022). Clinical tools and biomarkers to predict preeclampsia. EBioMedicine, 75.  Chaemsaithong, P., Sahota, D. S., & Poon, L. C. (2022). First trimester preeclampsia screening and prediction. American journal of obstetrics and gynecology, 226(2), S1071-S1097.  Stepan, H., Galindo, A., Hund, M., Schlembach, D., Sillman, J., Surbek, D., & Vatish, M. (2023). Clinical utility of sFlt‐1 and PlGF in screening, prediction, diagnosis and monitoring of pre‐eclampsia and fetal growth restriction. Ultrasound in Obstetrics & Gynecology, 61(2), 168-180.  Mészáros, B., Kukor, Z., & Valent, S. (2023). Recent advances in the prevention and screening of preeclampsia. Journal of Clinical Medicine, 12(18), 6020.  Rybak-Krzyszkowska, M., Staniczek, J., Kondracka, A., Bogusławska, J., Kwiatkowski, S., Góra, T., ... & Górczewski, W. (2023). From Biomarkers to the Molecular Mechanism of Preeclampsia—A Comprehensive Literature Review. International Journal of Molecular Sciences, 24(17), 13252.  Jaszczuk, I., Winkler, I., Koczkodaj, D., Skrzypczak, M., & Filip, A. (2022). The role of cluster C19MC in pre-eclampsia development. International Journal of Molecular Sciences, 23(22), 13836.  Wu, Y., Liu, Y., & Ding, Y. (2021). Predictive performance of placental protein 13 for screening preeclampsia in the first trimester: a systematic review and meta-analysis. Frontiers in medicine, 8, 756383.  Malone, S. L., Haj Yahya, R., & Kane, S. C. (2022). Reviewing accuracy of first trimester screening for preeclampsia using maternal factors and biomarkers. International journal of women's health, 1371-1384.  Yao, M., Xiao, Y., Yang, Z., Ge, W., Liang, F., Teng, H., ... & Yin, J. (2022). Identification of biomarkers for preeclampsia based on metabolomics. Clinical Epidemiology, 337-360.  Tomkiewicz, J., & Darmochwał-Kolarz, D. A. (2024). Biomarkers for Early Prediction and Management of Preeclampsia: A Comprehensive Review. Medical Science Monitor: International Medical Journal of Experimental and Clinical Research, 30, e944104-1.  Thakur, P., & Bhalerao, A. (2023). High Homocysteine Levels During Pregnancy and Its Association With Placenta-Mediated Complications: A Scoping Review. Cureus, 15(2).  Qu, H., & Khalil, R. A. (2022). Role of ADAM and ADAMTS disintegrin and metalloproteinases in normal pregnancy and preeclampsia. Biochemical Pharmacology, 206, 115266.  KP, A., & Sekar, D. (2024). Advancements in microRNA-based electrochemical biosensors for preeclampsia detection. Hypertension Research, 1-3.  Meler, E., Martínez, J., Boada, D., Mazarico, E., & Figueras, F. (2021). Doppler studies of placental function. Placenta, 108, 91-96.  Gerasimova, E. M., Fedotov, S. A., Kachkin, D. V., Vashukova, E. S., Glotov, A. S., Chernoff, Y. O., & Rubel, A. A. (2019). Protein misfolding during pregnancy: new approaches to preeclampsia diagnostics. International journal of molecular sciences, 20(24), 6183.  **Single studies: Ghana:** Atluri, N., Beyuo, T. K., Oppong, S. A., Compton, S. D., Moyer, C. A., & Lawrence, E. R. (2023). Benefits and barriers of home blood pressure monitoring in pregnancy: perspectives of obstetric doctors from a Ghanaian tertiary hospital. BMC Pregnancy and Childbirth, 23(1), 42.  Lawrence, E. R., Atluri, N., Compton, S., & Beyuo, T. K. (2022). Provider-perceived acceptability, feasibility, and appropriateness of home blood pressure monitoring in Ghana. International Journal of Gynaecology and Obstetrics: the Official Organ of the International Federation of Gynaecology and Obstetrics.  Amponsah-Tabi, S., Dassah, E. T., Asubonteng, G. O., Ankobea, F., Annan, J. J., Senu, E., ... & Opare-Addo, H. S. (2022). An assessment of the quality of antenatal care and pregnancy outcomes in a tertiary hospital in Ghana. Plos one, 17(10), e0275933.  Abejirinde, I. O. O., De Brouwere, V., van Roosmalen, J., van der Heiden, M., Apentibadek, N., Bardají, A., & Zweekhorst, M. (2019). Viability of diagnostic decision support for antenatal care in rural settings: findings from the Bliss4Midwives Intervention in Northern Ghana. Journal of global health, 9(1).  Petca, A., Sinescu, R. D., Sandru, F., Petca, R. C., Dumitrascu, M. C., Mehedintu, C., & Zvanca, M. E. (2022). New approaches in predicting and diagnosing preeclampsia: Congo Red Dot Paper Test. Experimental and Therapeutic Medicine, 23(4), 1-5.  Beyuo, T. K., Lawrence, E. R., Kobernik, E. K., & Oppong, S. A. (2022). Clinical presentation and predictors of eclampsia among women with hypertensive disorders of pregnancy in Ghana. Pregnancy Hypertension, 30, 171-176.  **ISSHP Guideline:** page 155, summary of early detection evidence. Recommendation: "It will be important to confirm the cost effectiveness of multivariable screening for pre-eclampsia risk and intervention, contextualised to population, disease prevalence, and models and costs of care." | There is much research into this topic, but most papers describe the need for more research and there are no reviews within Ghana yet. I would also argue that contextual factors are important for this question, specifically regarding the implementation of early diagnosis techniques in Ghana. | Partly unanswered |
| D_10 | To what extent do healthcare professionals in Ghana explain the diagnosis of HDP to patients, and how can this be improved? | HDP synonyms* AND (Diagnosis [MeSH] OR diagnos*[Title/Abstract] OR identificat*[Title/Abstract]) AND (“Health Personnel”[MeSH] OR "clinician*"[Title/Abstract] OR "physician*"[Title/Abstract] OR "doctor*"[Title/Abstract] OR "medical practitioner*"[Title/Abstract] OR "healthcare practitioner*"[Title/Abstract] OR "health practitioner*"[Title/Abstract] OR "healthcare provider*"[Title/Abstract] OR "healthcare worker*"[Title/Abstract] OR "medical professional*"[Title/Abstract] OR "nurse*"[Title/Abstract] OR "midwi*"[Title/Abstract] OR HCP[Title/Abstract] OR "healthcare professional*"[Title/Abstract]) AND (Patient Education as Topic[MeSH] AND Explain*[Title/Abstract] OR inform*[Title/Abstract] OR counsel*[Title/Abstract] OR communicat*[Title/Abstract] OR educat*[Title/Abstract] OR tell*[Title/Abstract] OR advi*[Title/Abstract]) AND Location synonyms* | **Pubmed:**  June 11th, 2024  8 (Ghana 2019-2024, all study types)  10 (west Africa 2019-2024, all study types)  20 (SSA 2019-2024, all study types)  **Cochrane:**  June 11th, 2024  2 (Ghana 2019-2024, all study types)  3 (west Africa 2019-2024, all study types)  14 (SSA 2019-2024, all study types)  **Scopus:**  June 19th, 2024  6 (Ghana 2019-2024, all study types)  20 (west Africa 2019-2024, all study types)  41 (SSA 2019-2024, all study types) | **Reviews:** none  **Single studies: Ghana:**  Joshi, A., Beyuo, T., Oppong, S. A., Moyer, C. A., & Lawrence, E. R. (2020). Preeclampsia knowledge among postpartum women treated for preeclampsia and eclampsia at Korle Bu Teaching Hospital in Accra, Ghana. BMC pregnancy and childbirth, 20, 1-11.  Joshi, A., Beyuo, T. K., Oppong, S. A., Moyer, C. A., & Lawrence, E. R. (2022). ‘I don’t really understand this BP’: Women’s knowledge, attitudes, and experiences with preeclampsia in Ghana. PLOS Global Public Health, 2(7), e0000121.  **West-africa:** none **SSA:** none **LMICs:** not searched **Global:** not searched | Large knowledge gap here: only two single studies in all of sub-Saharan Africa about this topic, but interestingly they are both from Ghana. The studies report inadequate counseling: one found that 38% of HDP patients is not counselled at all, and another 26% understood less than half of the explanation. Only 22% of patients could name her diagnosis. The other study found that HCP provide inadequate counseling, including little patient involvement and shared decision-making, and little explanation unless specific questions are asked by the patient. This made patients turn to herbal medication or not adhere to the prescribed drugs. Adequate counseling showed to have the potential to relieve anxiety. Patients identified contributing factors to the inadequate counseling: patients not taking HDP seriously, being stubborn, and HCPs having too many patients to care for.  This data clearly shows the lack of counseling, however both studies took place in Accra. There is a need for more research, especially in different parts of Ghana. | Broadly unanswered |
| D_11 | How can healthcare providers make sure that their questions and explanation are understandable for all HDP patients in Ghana? | HDP synonyms*  AND   (Health Communication[MeSH] OR Professional-Patient Relations[MeSH] OR language[Title/Abstract] OR communication[Title/Abstract] OR vocabulary[Title/Abstract] OR phras*[Title/Abstract] OR understandable[Title/Abstract] OR wording[Title/Abstract])   AND  Location synonyms* | **Pubmed:**  June 14th, 2024  6 (Ghana 2019-2024, all study types)  13 (west Africa 2019-2024, all study types)  29 (SSA 2019-2024, all study types)  **Cochrane:**  June 14th, 2024  0 (Ghana 2019-2024, all study types)  1 (west Africa 2019-2024, all study types)  3 (SSA 2019-2024, all study types)  **Scopus:**  June 14th, 2024  7 (Ghana 2019-2024, all study types)  41 (west Africa 2019-2024, all study types)  74 (SSA 2019-2024, all study types) | **Reviews:** None **All studies: Ghana:** Garti, I., Gray, M., Bromley, A., & Tan, J. Y. B. (2024). Midwives’ experiences of providing pre-eclampsia care in a low-and middle-income country–A qualitative study. Women and Birth, 37(2), 332-339.  Adu-Bonsaffoh, K., Tamma, E., Nwameme, A., Dako-Gyeke, P., Srofenyoh, E., Ansah, E. K., ... & Browne, J. L. (2023). Provision and experience of care among women with hypertension in pregnancy: a multi-center qualitative study in Ghana. Reproductive Health, 20(1), 49. **West-africa:** NA **SSA:** Robbins, T., Shennan, A., Sandall, J., Guangul, T. E., Demissew, R., Abdella, A., ... & Hanlon, C. (2023). Understanding challenges as they impact on hospital-level care for pre-eclampsia in rural Ethiopia: a qualitative study. BMJ open, 13(4), e061500.  Robbins, T., Hanlon, C., Kelly, A. H., Gidiri, M. F., Musiyiwa, M., Silverio, S. A., ... & Sandall, J. (2021). Pills and prayers: a comparative qualitative study of community conceptualisations of pre-eclampsia and pluralistic care in Ethiopia, Haiti and Zimbabwe. BMC Pregnancy and Childbirth, 21, 1-14.  Guérin Benz, J., Stancanelli, G., Zambruni, M., Paulin, M. R., Hantavololona, H., Andrianarisoa, V. R., ... & Benski, C. (2024). Simulation training on respectful emergency obstetric and neonatal care in north-western Madagascar: a mixed-methods evaluation of an innovative training program. Advances in Simulation, 9(1), 18. **LMICs:** not searched **Global:** not searched **Ongoing studies:** Amoakoh, H. B., De Kok, B. C., Yevoo, L. L., Olde Loohuis, K. M., Srofenyoh, E. K., Arhinful, D. K., ... & Browne, J. L. (2024). Co-creation of a toolkit to assist risk communication and clinical decision-making in severe preeclampsia: SPOT-Impact study design. Global Health Action, 17(1), 2336314. | Single studies emphasize different problems (and thus also starting points for solutions) with communicating HDP to patients in Ghana and sub-Saharan Africa, such as social hierarchies and punitive cultures, the lack of a familiar/descriptive name for preeclampsia and language barriers. However, no reviews exist so far, which makes this an important area for further research. Currently, the SPOT-impact study is taking place, which will also shed light on this question. It could thus be worthwhile to wait with new research projects on this topic until the SPOT results are available. | Broadly unanswered |
| D_12 | What is the current level of awareness about HDP in Ghana, and how can this be increased? | HDP synonyms*  AND  (Health Literacy[MeSH] OR Awareness[MeSH] OR Knowledge[MeSH] OR aware*[Title/Abstract] OR knowledge*[Title/Abstract] OR educat*[Title/Abstract] OR understanding[Title/Abstract] OR insight*[Title/Abstract] OR comprehen*[Title/Abstract] OR information[Title/Abstract] OR familiar*[Title/Abstract])  AND  Location synonyms* | **Pubmed:**  June 12th, 2024  46 (Ghana 2019-2024, all study types)  **Cochrane:**  June 12th, 2024  12 (Ghana 2019-2024, all study types)  **Scopus:**  June 12th, 2024  59 (Ghana 2019-2024, all study types) | **Reviews:** none  **All studies: Ghana:** Agbeno, E. K., Osarfo, J., Owusu, G. B., Opoku Aninng, D., Anane-Fenin, B., Amponsah, J. A., ... & Mohammed, M. (2022). Knowledge of hypertensive disorders of pregnancy among pregnant women attending antenatal clinic at a tertiary hospital in Ghana. SAGE Open Medicine, 10, 20503121221088432.  Fondjo, L. A., Boamah, V. E., Fierti, A., Gyesi, D., & Owiredu, E. W. (2019). Knowledge of preeclampsia and its associated factors among pregnant women: a possible link to reduce related adverse outcomes. BMC pregnancy and childbirth, 19, 1-7.  Joshi, A., Beyuo, T. K., Oppong, S. A., Moyer, C. A., & Lawrence, E. R. (2022). ‘I don’t really understand this BP’: Women’s knowledge, attitudes, and experiences with preeclampsia in Ghana. PLOS Global Public Health, 2(7), e0000121.  Garti, I., Gray, M., Bromley, A., & Tan, J. Y. B. (2024). Midwives’ experiences of providing pre-eclampsia care in a low-and middle-income country–A qualitative study. Women and Birth, 37(2), 332-339.  Adu-Bonsaffoh, K., Tamma, E., Nwameme, A. U., & Browne, J. L. (2022). Health professionals' perspectives on clinical challenges in managing hypertensive disorders of pregnancy and recommendations for improving care: A multi-center qualitative study. Frontiers in Global Women's Health, 3, 968914.  Tamma, E., Adu-Bonsaffoh, K., Nwameme, A., Dako-Gyeke, P., Srofenyoh, E., & Browne, J. (2023). Maternal hypertensive mother’s knowledge, attitudes and misconceptions on hypertension in pregnancy: A multi-center qualitative study in Ghana. PLOS Global Public Health, 3(1), e0001456.  Atluri, N., Beyuo, T. K., Oppong, S. A., Moyer, C. A., & Lawrence, E. R. (2023). Challenges to diagnosing and managing preeclampsia in a low-resource setting: A qualitative study of obstetric provider perspectives from Ghana. PLOS Global Public Health, 3(5), e0001790.  Boachie-Ansah, P., Anto, B. P., Marfo, A. F. A., Dassah, E. T., Cobbold, C. C., & Asiamah, M. (2023). Prevalence, Awareness, and Control of Hypertensive Disorders amongst Pregnant Women Seeking Healthcare in Ghana. Journal of Pregnancy, 2023(1), 4194443. **Global, LMICs, SSA & West-africa:** not searched | Quite some evidence from single studies about the current knowledge level in Ghana, but no reviews and only little information on ways to increase knowledge. | Partly unanswered |
| D_13 | To what extent can complications be prevented through accurate and timely diagnosis of HDP in Ghana? | HDP synonyms*  AND  (Diagnosis [MeSH] OR diagnos*[Title/Abstract] OR identificat*[Title/Abstract] OR Detect*[Title/Abstract])  AND   (Pregnancy Complications[MeSH] OR complicati*[Title/Abstract] OR adverse outcome*[Title/Abstract] OR adverse birth outcome*[Title/Abstract] OR eclampsia[Title/Abstract] OR HELLP syndrome[Title/Abstract] OR Hemolysis, Elevated Liver Enzymes, Low Platelet Syndrome[Title/Abstract] OR associated condition*[Title/Abstract] OR morbidit*[Title/Abstract] OR mortalit*[Title/Abstract] OR infection*[Title/Abstract] OR miscarriage*[Title/Abstract] OR spontaneous abortion*[Title/Abstract])  AND  Location synonyms* | **Pubmed:**  June 16th, 2024  40 (Ghana 2019-2024, all study types)  1 (Ghana 2019-2024, reviews)  **Cochrane:**  June 16th, 2024  5 (Ghana 2019-2024, all study types)  0 (Ghana 2019-2024, reviews)  **Scopus:**  N/A | **Reviews: Ghana:** none  **All studies:** **Ghana:** Ahenkorah, B., Sakyi, S. A., Helegbe, G., Owiredu, E. W., Fondjo, L. A., Ofosu, W., ... & Gyan, B. (2022). Foeto-maternal complications associated with low birth weight: A prospective multicenter study in northern Ghana. Plos one, 17(4), e0266796.  Atluri, N., Beyuo, T. K., Oppong, S. A., Compton, S. D., Moyer, C. A., & Lawrence, E. R. (2023). Benefits and barriers of home blood pressure monitoring in pregnancy: perspectives of obstetric doctors from a Ghanaian tertiary hospital. BMC Pregnancy and Childbirth, 23(1), 42.  Dah, A. K., Osarfo, J., Ampofo, G. D., Appiah-Kubi, A., Mbroh, H., Azanu, W. K., ... & Morhe, E. S. K. (2023). Stillbirth incidence and determinants in a tertiary health facility in the Volta Region of Ghana. Plos one, 18(12), e0296076.  Fondjo, L. A., Amoah, B., Tashie, W., & Annan, J. J. (2022). Risk factors for the development of new-onset and persistent postpartum preeclampsia: A case–control study in Ghana. Women's Health, 18, 17455057221109362.  Amponsah-Tabi, S., Dassah, E. T., Asubonteng, G. O., Ankobea, F., Annan, J. J., Senu, E., ... & Opare-Addo, H. S. (2022). An assessment of the quality of antenatal care and pregnancy outcomes in a tertiary hospital in Ghana. Plos one, 17(10), e0275933.  Bugri, A. A., Gumanga, S. K., Yamoah, P., Frimpong, E. K., & Nlooto, M. (2023). Prevalence of Hypertensive Disorders, Antihypertensive Therapy and Pregnancy Outcomes among Pregnant Women: A Retrospective Review of Cases at Tamale Teaching Hospital, Ghana. International Journal of Environmental Research and Public Health, 20(12), 6153.  Atluri, N., Beyuo, T. K., Oppong, S. A., Moyer, C. A., & Lawrence, E. R. (2023). Challenges to diagnosing and managing preeclampsia in a low-resource setting: A qualitative study of obstetric provider perspectives from Ghana. PLOS Global Public Health, 3(5), e0001790.  Anane-Fenin, B., Agbeno, E. K., Osarfo, J., Opoku Anning, D. A., Boateng, A. S., Ken-Amoah, S., ... & Jeffery, E. (2021). A ten-year review of indications and outcomes of obstetric admissions to an intensive care unit in a low-resource country. Plos one, 16(12), e0261974.  Drechsel, K. C., Adu-Bonsaffoh, K., Loohuis, K. M. O., Srofenyoh, E. K., Boateng, D., & Browne, J. L. (2022). Maternal near-miss and mortality associated with hypertensive disorders of pregnancy remote from term: a multicenter observational study in Ghana. AJOG Global Reports, 2(2), 100045. **West-africa:** not searched **SSA:** not searched **LMICs:** not searched **Global:** not searched | No reviews performed specifically for Ghana. All studies clearly state the necessity of early (earlier) diagnosis to prevent complications, based on finding of relatively high complications (fetal mortality, adverse pregnancy outcomes, near misses). The extent to which different complications could be prevented, however, has not been clearly studied. | Partly unanswered |
| D_14 | What is the financial burden of diagnostic tests for HDP patients in Ghana, and how can this be improved? | (Prenatal Care[MeSH] OR Maternal Health Services[MeSH] OR antenatal[Title/Abstract] OR ANC[Title/Abstract] OR prenatal*[Title/Abstract] OR pregnancy care[Title/Abstract] OR maternal care[Title/Abstract] OR maternity care[Title/Abstract] OR maternal health service*[Title/Abstract] OR Maternal health care[Title/Abstract] OR BP[Title/Abstract] OR blood pressure[Title/Abstract] OR hypertension[Title/Abstract] OR proteinuria[Title/Abstract] OR dipstick[Title/Abstract] OR urine protein[Title/Abstract])  AND  (Health Expenditures[MeSH] OR Health insurance[MeSH] OR health insurance*[Title/Abstract] OR national health insurance scheme[Title/Abstract] OR NHIS[Title/Abstract] OR expense*[Title/Abstract] OR Out of pocket*[Title/Abstract] OR out-of-pocket*[Title/Abstract] OR expenditure*[Title/Abstract] OR patient cost*[Title/Abstract] OR patient’s cost*[Title/Abstract] OR patients’ cost*[Title/Abstract] OR own cost*[Title/Abstract] OR affordab*[Title/Abstract] OR pricing[Title/Abstract] OR insurance coverage[Title/Abstract])  AND  Location synonyms* | **Pubmed:**  June 16th, 2024  55 (Ghana 2021-2024, all study types)  4 (Ghana 2021-2024, reviews)  **Cochrane:**  June 16th, 2024  8 (Ghana 2021-2024, all study types)  0 (Ghana 2021-2024, reviews)  **Scopus:**  June 16th, 2024  150 (Ghana 2019-2024, all study types)  11 (Ghana 2019-2024, reviews) | **Reviews: Ghana:** none  **All studies: Ghana:** Kumbeni, M. T., Afaya, A., & Apanga, P. A. (2023). An assessment of out of pocket payments in public sector health facilities under the free maternal healthcare policy in Ghana. Health Economics Review, 13(1), 8.  Donneyong, M. M., Chang, T. J., Pottegård, A., Ankrah, D., Asenso‐Boadi, F., Addo‐Cobbiah, V., ... & Hallas, J. (2021). Prevalence and quality of antihypertensive therapy among hypertension patients enrolled in the Ghana National Health Insurance Scheme. Pharmacoepidemiology and Drug Safety, 30(11), 1566-1575.  Oseni, T. I. A., Blankson, P. K., Dele-Ojo, B. F., Duodu, F., Echieh, C. P., Alabi, S. B., ... & Ogedegbe, G. (2023). Medication adherence and blood pressure control: A preliminary assessment of the role of health insurance in Nigeria and Ghana. SAGE Open Medicine, 11, 20503121231152324.  Harrison, M. A., Marfo, A. F. A., Opare-Addo, M. N. A., Ankrah, D. N. A., Acheampong, F., Nelson, F., & Buabeng, K. O. (2021). Anti-hypertensive medication access and affordability and their association with blood pressure control at a teaching hospital in Ghana. Pan African Medical Journal, 39(1).  Bassoumah, B., Adam, A. M., & Adokiya, M. N. (2021). Challenges to the utilization of Community-based Health Planning and Services: the views of stakeholders in Yendi Municipality, Ghana. BMC Health Services Research, 21, 1-9.  Ekholuenetale, M., & Barrow, A. (2021). Inequalities in out-of-pocket health expenditure among women of reproductive age: after-effects of national health insurance scheme initiation in Ghana. Journal of the Egyptian Public Health Association, 96, 1-14.  Odikro, M. A., Kenu, E., Adanu, R. M., Bandoh, D. A., Berrueta, M., Chakraborty, S., ... & Jolivet, R. R. (2024). Validating the implementation of an indicator reporting policies and laws on free public maternal health-related services in the era of universal health coverage: A multi-country cross-sectional study. Plos one, 19(3), e0299249.  Azaare, J., Aninanya, G. A., Abdulai, K., Adane, F., Bio, R. B., & Hushie, M. (2024). Maternal health care utilization following the implementation of the free maternal health care policy in Ghana: analysis of Ghana demographic and health surveys 2008–2014. BMC Health Services Research, 24(1), 207.  Abiiro, G. A., Abdul-Latif, A. M., Akaateba, D., Braimah, K. R. L., Alhassan, M., Hadfield, K., & Hadfield, K. (2024). A qualitative examination of factors influencing pregnancy-related anxiety in Northern Ghana. Midwifery, 134, 104014.  Novignon, J., Atakorah, Y. B., & Chijere Chirwa, G. (2021). Exemption for the poor or the rich? An assessment of socioeconomic inequalities in Ghana’s national health insurance exemption policies. Health Policy and Planning, 36(7), 1058-1066.  Ekholuenetale, M., Igwegbe Nzoputam, C., Ehimwenma Joshua, C., & Barrow, A. (2024). Impact of Socioeconomic Factors and Health Insurance Coverage on Out‐of‐Pocket Health Expenditure among Ghanaian Women: Implications for Health Financing Policy. Advances in Public Health, 2024(1), 8414003.Vellekoop, H., Odame, E., & Ochalek, J. (2022). Supporting a review of the benefits package of the National Health Insurance Scheme in Ghana. Cost Effectiveness and Resource Allocation, 20(1), 32.  Kofinti, R. E., Asmah, E. E., & Ameyaw, E. K. (2022). Comparative study of the effect of National Health Insurance Scheme on use of delivery and antenatal care services between rural and urban women in Ghana. Health Economics Review, 12(1), 13. Bassoumah, B., Adam, A. M., & Adokiya, M. N. (2021). Challenges to the utilization of Community-based Health Planning and Services: the views of stakeholders in Yendi Municipality, Ghana. BMC Health Services Research, 21, 1-9.  Ward, C. L., Guo, M. Z., Amukele, T. K., Abdul-Karim, A., & Schroeder, L. F. (2021). Availability and prices of WHO essential diagnostics in laboratories in West Africa: a landscape survey of diagnostic testing in Northern Ghana. The journal of applied laboratory medicine, 6(1), 51-62.  Adomako, N. O., Marfo, A. F. A., Opare-Addo, M. N. A., Nyamekye, N., & Owusu-Daaku, F. T. (2021). Blood pressure control, accessibility, and adherence to antihypertensive medications: patients seeking care in two hospitals in the ashanti region of Ghana. International journal of hypertension, 2021(1), 9637760.  **Global, LMICs, SSA & West-Africa:** not searched | There were no reviews from Ghana about this topic, but there were high-quality single studies and reviews of national demographic surveys. The coverage of the NHIS was also considered relevant for this question, as the NHIS in theory covers all basic diagnostic expenses for HDP. Even though NHIS coverage is very high (90%) and antihypertensive use is high among members as well, many studies found that about 1/5 women with a valid NHIS membership still had to pay out of pocket costs for ANC appointments/lab tests. Among these women, BP control is worse. Reasons that are mentioned for this are delays in reimbursement, mismatch with out-of-pocket test prices and an inadequate budget for the necessary health costs.  The height of the out of pocket costs charged to women enrolled in the NHIS was not described, which could be an area of interest for further research. | Partly unanswered |

**B. Literature review findings and justification**

| **TREATMENT** | | | | | | |
| --- | --- | --- | --- | --- | --- | --- |
| **ID** | **Uncertainty** | **Search string** | **Search results** | **Evidence: sources** | **Evidence: summary** | **Judgment** |
| T_01 | What are the challenges for healthcare professionals in Ghana regarding the provision of adequate treatment for HDP?   (Domains: knowledge and skills, hospital equipment, clear protocols and adherence to these, timing of treatment, compared to rural areas, different health facility levels, antenatal/intrapartum management consequences for fetus) | HDP synonyms  AND  (“Health Personnel”[MeSH] OR "clinician*"[Title/Abstract] OR "physician*"[Title/Abstract] OR "doctor*"[Title/Abstract] OR "medical practitioner*"[Title/Abstract] OR "healthcare practitioner*"[Title/Abstract] OR "health practitioner*"[Title/Abstract] OR "healthcare provider*"[Title/Abstract] OR "healthcare worker*"[Title/Abstract] OR "medical professional*"[Title/Abstract] OR "nurse*"[Title/Abstract] OR "midwi*"[Title/Abstract] OR HCP[Title/Abstract] OR "healthcare professional*"[Title/Abstract])  AND  "challeng*"[Title/Abstract]) | July 26th, 2024  9 (Ghana 2019-2024, all study types)  9 (West Africa, all study types)  31 (SSA, all study types) | **Ghana:**  Dartey AF, Dzansi G, Lotse CW, Obuobisa R, Afua Bosu CE, Afaya A. Midwives Experiences of Managing Clients with Eclampsia in a low Resource Setting: A Qualitative Descriptive Study. SAGE Open Nurs. 2022 May 16;8:23779608221094542. doi: 10.1177/23779608221094542. PMID: 35600007; PMCID: PMC9118454.  Garti I, Gray M, Bromley A, Tan JB. Midwives' experiences of providing pre-eclampsia care in a low- and middle-income country - A qualitative study. Women Birth. 2024 Mar;37(2):332-339. doi: 10.1016/j.wombi.2023.11.001. Epub 2023 Nov 17. PMID: 37977957.  Adu-Bonsaffoh K, Tamma E, Nwameme A, Dako-Gyeke P, Srofenyoh E, Ansah EK, Grobbee DE, Franx A, Browne JL. Provision and experience of care among women with hypertension in pregnancy: a multi-center qualitative study in Ghana. Reprod Health. 2023 Mar 25;20(1):49. doi: 10.1186/s12978-023-01593-0. PMID: 36966326; PMCID: PMC10039538.  Adu-Bonsaffoh K, Tamma E, Nwameme AU, Browne JL. Health professionals' perspectives on clinical challenges in managing hypertensive disorders of pregnancy and recommendations for improving care: A multi-center qualitative study. Front Glob Womens Health. 2022 Nov 10;3:968914. doi: 10.3389/fgwh.2022.968914. PMID: 36440321; PMCID: PMC9686376.  Atluri N, Beyuo TK, Oppong SA, Moyer CA, Lawrence ER. Challenges to diagnosing and managing preeclampsia in a low-resource setting: A qualitative study of obstetric provider perspectives from Ghana. PLOS Glob Public Health. 2023 May 2;3(5):e0001790. doi: 10.1371/journal.pgph.0001790. PMID: 37130091; PMCID: PMC10153692.  **Sub-Sahara:**  Meazaw MW, Chojenta C, Forder P, Taddele T, Loxton D. Health Care Readiness in Management of Preeclampsia/Eclampsia in Ethiopia: Evidence from National Facility-Based Survey. Risk Manag Healthc Policy. 2022 Jun 16;15:1225-1241. doi: 10.2147/RMHP.S366055. PMID: 35734013; PMCID: PMC9208466.  Ngwira MM, Gadama LA, Shanmugalingam R, Makris A, Hennessy A. Patients and health care workers perceived challenges in managing preeclampsia, in Malawi. Pregnancy Hypertens. 2024 Mar;35:61-65. doi: 10.1016/j.preghy.2024.01.132. Epub 2024 Jan 20. PMID: 38244242.  Namagembe I, Karavadra B, Kazibwe L, Rujumba J, Kiwanuka N, Smith B, Byamugisha J, Moffett A, Bashford T, Nakimuli A, Aiken CE. Implementation challenges in preeclampsia care: perspectives from health care professionals in urban Uganda. AJOG Glob Rep. 2024 Apr 2;4(2):100348. doi: 10.1016/j.xagr.2024.100348. PMID: 38681952; PMCID: PMC11046291.  Robbins T, Shennan A, Sandall J, Eshetu Guangul T, Demissew R, Abdella A, Mayston R, Hanlon C. Understanding challenges as they impact on hospital-level care for pre-eclampsia in rural Ethiopia: a qualitative study. BMJ Open. 2023 Apr 17;13(4):e061500. doi: 10.1136/bmjopen-2022-061500. PMID: 37068897; PMCID: PMC10111927.  Ramavhoya IT, Maputle MS, Lebese RT. Can Women's Lives be saved from Hypertensive Disorders during Pregnancy? Experiences of South African Midwives. Afr J Reprod Health. 2020 Jun;24(2):152-163. doi: 10.29063/ajrh2020/v24i2.15. PMID: 34077101.  **LMIC**: Not searched | There are no systematic reviews performed in Ghana or at sub-Saharan level on this issue. Single country or site-specific studies show a range of challenges experienced based on qualitative studies conducted | Partly unanswered |
| T_02 | When are and should HDP patients in Ghana be referred to other health facility levels? | HDP synonyms  AND  "refer*"[Title/Abstract]) AND “Referral and Consultation” [MeSH] | July 26th, 2024  1 (Ghana 2019-2024, all study types)   27 (SSA 2019-2024, all study types) | **Reviews:** none  **Ghana:**  Garti I, Gray M, Bromley A, Tan BJ. A socioecological description of the influencing factors to midwives' management of preeclampsia in a Ghanaian tertiary hospital. PLoS One. 2023 Sep 13;18(9):e0291036. doi: 10.1371/journal.pone.0291036. PMID: 37703258; PMCID: PMC10499208.  **Sub-Sahara:**  Takai IU, Yusuf M, Bashir H. Audit of emergency obstetric referrals at a tertiary center in Kano. Ann Afr Med. 2023 Jul-Sep;22(3):265-270. doi: 10.4103/aam.aam_8_22. PMID: 37417012; PMCID: PMC10445721.  Assefa EM, Berhane Y. Delays in emergency obstetric referrals in Addis Ababa hospitals in Ethiopia: a facility-based, cross-sectional study. BMJ Open. 2020 Jun 23;10(6):e033771. doi: 10.1136/bmjopen-2019-033771. PMID: 32580981; PMCID: PMC7312330.  Sakurai S, Mwilike B, Horiuchi S. Women's experiences with hypertensive disorders of pregnancy from a national referral hospital in Tanzania: A qualitative study. Jpn J Nurs Sci. 2023 Jan;20(1):e12513. doi: 10.1111/jjns.12513. Epub 2022 Sep 18. PMID: 36116438.  Rashid SA, Seif SA. Auditing the readiness of healthcare facilities for referral and management of pre-eclampsia cases in Zanzibar- a study protocol. PLoS One. 2023 Jun 2;18(6):e0286498. doi: 10.1371/journal.pone.0286498. PMID: 37267245; PMCID: PMC10237472.  Lavender T, Bedwell C, Blaikie K, Danna VA, Sutton C, Kasengele CT, Wakasiaka S, Vwalika B, Laisser R. Journey of vulnerability: a mixed-methods study to understand intrapartum transfers in Tanzania and Zambia. BMC Pregnancy Childbirth. 2020 May 14;20(1):292. doi: 10.1186/s12884-020-02996-8. PMID: 32408871; PMCID: PMC7222428.  Nabulo H, Gottfredsdottir H, Joseph N, Kaye DK. Experiences of referral with an obstetric emergency: voices of women admitted at Mbarara Regional Referral Hospital, South Western Uganda. BMC Pregnancy Childbirth. 2023 Jul 6;23(1):498. doi: 10.1186/s12884-023-05795-z. PMID: 37415127; PMCID: PMC10327367.  **LMIC**: Not searched | There are no systematic reviews performed in Ghana or at sub-Saharan level on this issue. Single country or site-specific studies present specific challenges and processes for referral including impact on the maternal and newborn outcome. | Partly unanswered |
| T_03 | To what extent do healthcare professionals in Ghana educate HDP patients about their treatment, and how can this be improved?  (Domains: importance of treatment, treatment plan, management explanation including side effects of treatment, lifestyle/exercise, delivery options, consensus and adherence) | HDP synonyms AND (Therapeutics[MeSH] OR treat*[Title/Abstract] OR manage*[Title/Abstract] OR medic*[Title/Abstract] OR therap*[Title/Abstract] OR care*[Title/Abstract] OR handl*[Title/Abstract] OR caring[Title/Abstract] OR plan*[Title/Abstract] OR interven*[Title/Abstract] OR remed*[Title/Abstract] OR cure*[Title/Abstract] OR curing[Title/Abstract]) AND (“Health Personnel”[MeSH] OR "clinician*"[Title/Abstract] OR "physician*"[Title/Abstract] OR "doctor*"[Title/Abstract] OR "medical practitioner*"[Title/Abstract] OR "healthcare practitioner*"[Title/Abstract] OR "health practitioner*"[Title/Abstract] OR "healthcare provider*"[Title/Abstract] OR "healthcare worker*"[Title/Abstract] OR "medical professional*"[Title/Abstract] OR "nurse*"[Title/Abstract] OR "midwi*"[Title/Abstract] OR HCP[Title/Abstract] OR "healthcare professional*"[Title/Abstract]) AND (Patient Education as Topic[MeSH] OR Explain*[Title/Abstract] OR inform*[Title/Abstract] OR counsel*[Title/Abstract] OR communicat*[Title/Abstract] OR educat*[Title/Abstract] OR tell*[Title/Abstract] OR advi*[Title/Abstract]) | July 25th, 2024  14 (Ghana 2019-2024, all study types)  21 (west Africa 2019-2024, all study types)  55 (SSA 2019-2024, all study types)  **Cochrane:**  July 26th, 2024  0 (Ghana 2019-2024, all study types)  9 (west Africa 2019-2024, all study types)  25 (SSA 2019-2024, all study types)  **Scopus:**  July 26th, 2024  19 (Ghana 2019-2024, all study types)  61 (west Africa 2019-2024, all study types)  150 (SSA 2019-2024, all study types) | **Reviews:** none  **All studies: Ghana:** Joshi, A., Beyuo, T. K., Oppong, S. A., Moyer, C. A., & Lawrence, E. R. (2022). ‘I don’t really understand this BP’: Women’s knowledge, attitudes, and experiences with preeclampsia in Ghana. PLOS Global Public Health, 2(7), e0000121.  Adu-Bonsaffoh, K., Tamma, E., Nwameme, A., Dako-Gyeke, P., Srofenyoh, E., Ansah, E. K., ... & Browne, J. L. (2023). Provision and experience of care among women with hypertension in pregnancy: a multi-center qualitative study in Ghana. Reproductive health, 20(1), 49.  Adu-Bonsaffoh, K., Tamma, E., Nwameme, A. U., & Browne, J. L. (2022). Health professionals' perspectives on clinical challenges in managing hypertensive disorders of pregnancy and recommendations for improving care: A multi-center qualitative study. Frontiers in global women's health, 3, 968914.  **West-africa:** NA **SSA:**  Kwezi, H. A., Mselle, L. T., Leshabari, S., Hanson, C., & Pembe, A. B. (2021). How communication can help women who experience a maternal near-miss: a qualitative study from Tanzania. BMJ open, 11(11), e045514.  Robbins, T., Shennan, A., Sandall, J., Guangul, T. E., Demissew, R., Abdella, A., ... & Hanlon, C. (2023). Understanding challenges as they impact on hospital-level care for pre-eclampsia in rural Ethiopia: a qualitative study. BMJ open, 13(4), e061500. **Global & LMICs:** not searched | There are no reviews performed in Ghana on this issue. Single studies show that communication is often lacking regarding termination of pregnancy, procedures involved with preeclampsia treatment, which leads to misunderstanding, non-compliance, refusal of hospital admission, and switching to spiritual leaders. This was worse for women with no or minimal educational attainment. Women who were unconscious during care were often not informed later of what happened. Patients reported to expect adequate communication on the status and progress of their medical condition, to be engaged and encouraged to ask questions. This shows the lacking state of communication and the importance of more research and interventions to improve this. | Broadly unanswered |
| T_04 | What are the postpartum experiences of HDP patients in Ghana? | HDP synonyms  AND  (("Postpartum Period"[Mesh]) OR (Puerperium[Title/Abstract])) OR (Postpartum[Title/Abstract]) | July 26th, 2024  10 (Ghana 2019-2024, all study types) | No reviews available  **Ghana:**  Joshi A, Beyuo TK, Oppong SA, Moyer CA, Lawrence ER. 'I don't really understand this BP': Women's knowledge, attitudes, and experiences with preeclampsia in Ghana. PLOS Glob Public Health. 2022 Jul 13;2(7):e0000121. doi: 10.1371/journal.pgph.0000121. PMID: 36962267; PMCID: PMC10022332.  Adams YJ, Sladek L. A descriptive, cross-sectional study of postpartum education: midwives' self-reported knowledge and teaching of postpartum complications in Ghana. Reprod Health. 2022 Mar 28;19(1):77. doi: 10.1186/s12978-022-01376-z. PMID: 35346240; PMCID: PMC8962571.  Joshi A, Beyuo T, Oppong SA, Moyer CA, Lawrence ER. Preeclampsia knowledge among postpartum women treated for preeclampsia and eclampsia at Korle Bu Teaching Hospital in Accra, Ghana. BMC Pregnancy  Childbirth. 2020 Oct 15;20(1):625. doi: 10.1186/s12884-020-03316-w. PMID: 33059625; PMCID: PMC7566025.  Anto EO, Boadu WIO, Gyamfi LK, Korsah EE, Ansah E, Frimpong J, Tamakloe VCKT, Tawiah A, Aboagye E, Etwi-Mensah A, Anto AO, Obirikorang C. Preeclampsia in Ghana: A study on the prevalence and risk factors of postpartum readmission in the Ashanti Region. Public Health Chall. 2024 Jan 24;3(1):e154. doi: 10.1002/puh2.154. PMID: 40497076; PMCID: PMC12060764.  SSA and LMICs: Not searched | There are no reviews performed in Ghana on this issue. Single studies show that experience is discussed sparsely or at the concluding part of case/country studies s. This shows the lacking prioritization of experiences as a main point of discussion. | Broadly unanswered |
| T_05 | What role do patients' partners play in the treatment of HDP in Ghana? | HDP synonyms  AND | July 26th, 2024  1 (Ghana 2019-2024, all study types)   109 (SSA, 2019-2024, all study types) | No reviews identified  **Ghana:**  Thompson NN, Mumuni K, Oppong SA, Sefogah PE, Nuamah MA, Nkyekyer K. Effect of intimate partner violence in pregnancy on maternal and perinatal outcomes at the Korle Bu teaching hospital, Ghana: An observational cross sectional study. Int J Gynaecol Obstet. 2023 Jan;160(1):297-305. doi: 10.1002/ijgo.14375. Epub 2022 Aug 20. PMID: 35900103.  **Sub-Sahara:**  Nabulo H, Ruzaaza G, Mugabi F, Bajunirwe F. Perceptions on preeclampsia and eclampsia among senior, older women, in rural Southwestern Uganda. J Glob Health Rep. 2021;5:e2021009. doi: 10.29392/001c.19464. Epub 2021 Mar 3. PMID: 34541336; PMCID: PMC8445047.  Mooij R, Kapanga RR, Mwampagatwa IH, Mgalega GC, van Dillen J, Stekelenburg J, de Kok BC. Role of male partners in the long-term well-being of women who have experienced severe pre-eclampsia and eclampsia in rural Tanzania: a qualitative study. J Obstet Gynaecol. 2022 Jul;42(5):906-913. doi: 10.1080/01443615.2021.1958766. Epub 2021 Sep 24. PMID: 34558378. | There are no reviews performed in Ghana on this issue. A single study discussing the impact of domestic violence. Within the Sub-Saharan region, a single study has been identified on this topic in the last 5 years. | Broadly unanswered |
| T_06 | What are the adverse effects of commonly used HDP medication in Ghana?   (Domains: in general, dosage, length of use, long-term side effects, mental health effects, hypertension in pregnancy as side effect) | HDP synonyms  AND  "Therapeutics"[MeSH Terms]  AND  Ghana / SSA synonyms | July 26th, 2024  16 (Ghana 2019-2024, all study types)   190 (SSA, 2019-2024, all study types) | No reviews identified  Ghana:  SSA:  Cormick G, Betrán AP, Harbron J, Seuc A, White C, Roberts JM, Belizán JM, Hofmeyr GJ. The Effect of Calcium Supplementation on Body Weight Before and During Pregnancy in Women Enrolled in the WHO Calcium and Preeclampsia Trial. Food Nutr Bull. 2020 Sep;41(3):332-342. doi: 10.1177/0379572120944671. PMID: 33200626; PMCID: PMC11951462.  Phoswa WN, Naicker T, Ramsuran V, Moodley J. The Role of Highly Active Antiretroviral Therapy (HAART) on Interleukin 17A (IL-17A) in Normotensive and Preeclamptic Black South African Women. Infect Dis Obstet Gynecol. 2020 May 30;2020:3417632. doi: 10.1155/2020/3417632. PMID: 32550763; PMCID: PMC7277031. | Studies have been conducted on the adverse effects of HAART for patients with HIV co-morbidity and impact of calcium therapy. No recent studies identified based on the commonly used therapy in HDP. | Broadly unanswered |
| T_07 | What are the best ways to manage HDP patients in Ghana with the existing therapies?   (Domains: in general, intensity of monitoring, in relation to severity of HDP, gestational age, recovery, types and order of drugs, administration routes, dosage, in relation to resources, timing of treatment (in relation to BP level and type of HDP), chronic underlying conditions) | HDP synonyms  AND  "Therapeutics"[MeSH Terms]  AND  Ghana / SSA synonyms | July 26th, 2024  16 (Ghana 2019-2024, all study types)   190 (SSA, 2019-2024, all study types) | No reviews identified  Ghana:  Amponsah-Tabi S, Dassah ET, Asubonteng GO, Ankobea F, Annan JJK, Senu E, Opoku S, Opoku E, Opare-Addo HS. An assessment of the quality of antenatal care and pregnancy outcomes in a tertiary hospital in Ghana. PLoS One. 2022 Oct 12;17(10):e0275933. doi: 10.1371/journal.pone.0275933. PMID: 36223426; PMCID: PMC9555636.  Ahenkorah B, Sakyi SA, Helegbe G, Owiredu EW, Fondjo LA, Ofosu W, Der EM, Amoani B, Larbi AA, Cheetham S, Arthur-Johnson P, Kwablah GJ, Gyan B. Foeto-maternal complications associated with low birth weight: A prospective multicenter study in northern Ghana. PLoS One. 2022 Apr 8;17(4):e0266796. doi: 10.1371/journal.pone.0266796. PMID: 35395061; PMCID: PMC8992983  Mkhize PZ, Dorsamy V, Khaliq OP, Moodley J. Nurses' knowledge to identify, prevent and manage hypertensive disorder of pregnancy. S Afr Fam Pract (2004). 2024 Nov 8;66(1):e1-e7. doi: 10.4102/safp.v66i1.5995. PMID: 39625077; PMCID: PMC11622127.  SSA:  Asres AW, Samuel S, Daga WB, Tena A, Alemu A, Workie SB, Alemayehu M, Messel H. Association between iron-folic acid supplementation and pregnancy-induced hypertension among pregnant women in public hospitals, Wolaita Sodo, Ethiopia 2021: a case- control study. BMC Public Health. 2023 May 10;23(1):843. doi: 10.1186/s12889-023-15794-6. PMID: 37165342; PMCID: PMC10170668. | Recent case studies have elaborated on the clinical practices for HDP in specific hospitals in Ghana. There was a single study evaluating the current treatment guidelines and real-world practices in Ghana. | Partly unanswered |
| T_08 | How are HDP patients currently managed in Ghana?   (Domains: in general, types of drugs, monitoring of patients, variation between regions, cultures, religions and healthcare facilities, timing of medication (compared to BP and gestational age), timing of delivery) | HDP synonyms  AND  Ghana / SSA synonyms | July 26th, 2024  126 (Ghana 2019-2024, all study types)   190 (SSA, 2019-2024, all study types) | No relevant reviews identified  Ghana:  Garti I, Gray M, Bromley A, Tan JB. A qualitative document analysis of policies influencing preeclampsia management by midwives in Ghana. Women Birth. 2022 Nov;35(6):612-618. doi: 10.1016/j.wombi.2022.01.006. Epub 2022 Jan 21. PMID: 35074303.  Bugri AA, Gumanga SK, Yamoah P, Frimpong EK, Nlooto M. Prevalence of Hypertensive Disorders, Antihypertensive Therapy and Pregnancy Outcomes among Pregnant Women: A Retrospective Review of Cases at Tamale Teaching Hospital, Ghana. Int J Environ Res Public Health. 2023 Jun 16;20(12):6153. doi: 10.3390/ijerph20126153. PMID: 37372740; PMCID: PMC10298655.  Vestering A, de Kok BC, Browne JL, Adu-Bonsaffoh K. Navigating with logics: Care for women with hypertensive disorders of pregnancy in a tertiary hospital in Ghana. Soc Sci Med. 2021 Nov;289:114402. doi: 10.1016/j.socscimed.2021.114402. Epub 2021 Sep 14. PMID: 34600357.  SSA/LMIC: not further searched as question focuses on Ghana specifically | Recent case studies have elaborated on the clinical practices for HDP in specific hospitals in Ghana. There was a single study evaluating the current treatment guidelines and real-world practices in Ghana. | Partly unanswered |
| T_09 | What is the effectiveness of current treatments for HDP in Ghana?   (Domains: in general, effect on symptoms including BP or complications, effect of magnesium sulphate on convulsions, factors influencing response to treatment) | HDP synonyms  AND  "Therapeutics"[MeSH Terms]  AND  Ghana / SSA synonyms | July 26th, 2024  16 (Ghana 2019-2024, all study types)   190 (SSA, 2019-2024, all study types) | No relevant reviews identified  Ghana:  Fondjo LA, Sarpong D, Owiredu WKBA, Opoku S, Adu-Bonsaffoh K, Teviu E. Effect of magnesium sulfate treatment on mediators of endothelial dysfunction and electrolytes in mild and severe preeclampsia: A case-control study. Health Sci Rep. 2023 Apr 26;6(5):e1232. doi: 10.1002/hsr2.1232. PMID: 37123551; PMCID: PMC10130740.  Beyuo T, Lawrence E, Langen ES, Oppong SA. Open-labelled randomised controlled trial of 12 hours versus 24 hours modified Pritchard regimen in the management of eclampsia and pre-eclampsia in Ghana (MOPEP Study): study protocol. BMJ Open. 2019 Oct 22;9(10):e032799. doi: 10.1136/bmjopen-2019-032799. PMID: 31641005; PMCID: PMC6830657.  SSA:  Unwaha EA, Bello FA, Bello OO, Oladokun A. Intravenous magnesium sulfate in the management of severe pre-eclampsia: A randomized study of 12-hour versus 24-hour maintenance dose. Int J Gynaecol Obstet. 2020 Apr;149(1):37-42. doi: 10.1002/ijgo.13082. Epub 2020 Jan 8. PMID: 31833059.  Adebayo JA, Nwafor JI, Lawani LO, Esike CO, Olaleye AA, Adiele NA. Efficacy of nifedipine versus hydralazine in the management of severe hypertension in pregnancy: A randomised controlled trial. Niger Postgrad Med J. 2020 Oct-Dec;27(4):317-324. doi: 10.4103/npmj.npmj_275_20. PMID: 33154284. | Some studies were conducted to address effectiveness of some known therapies in HDP primarily magnesium sulfate | Partly unanswered |
| T_10 | What are possibilities for developing new medication for HDP?   (Domains: curative drugs, more effective drugs, prophylactic drugs, home-based treatment, administration routes and dosage, minimizing side effects) | HDP synonyms  AND  "Therapeutics"[MeSH Terms]  AND  Ghana / SSA synonyms | July 26th, 2024  16 (Ghana 2019-2024, all study types)   190 (SSA, 2019-2024, all study types) | No relevant review identified  Ghana:  Newman N, Beyuo TK, Nartey BA, Segbedzi-Rich E, Pangori A, Moyer CA, Lori JR, Oppong SA, Lawrence ER. Facilitators and barriers to home blood pressure monitoring among pregnant women in Ghana: a mixed-methods analysis of patient perspectives. BMC Pregnancy Childbirth. 2024 Mar 19;24(1):208. doi: 10.1186/s12884-024-06421-2. PMID: 38504214; PMCID: PMC10949704.  Beyuo T, Lawrence E, Langen ES, Oppong SA. Open-labelled randomised controlled trial of 12 hours versus 24 hours modified Pritchard regimen in the management of eclampsia and pre-eclampsia in Ghana (MOPEP Study): study protocol. BMJ Open. 2019 Oct 22;9(10):e032799. doi: 10.1136/bmjopen-2019-032799. PMID: 31641005; PMCID: PMC6830657.  SSA:  Cluver CA, Hiscock R, Decloedt EH, Hall DR, Schell S, Mol BW, Brownfoot F, Kaitu'u-Lino TJ, Walker SP, Tong S. Use of metformin to prolong gestation in preterm pre-eclampsia: randomised, double blind, placebo controlled trial. BMJ. 2021 Sep 22;374:n2103. doi: 10.1136/bmj.n2103. PMID: 34551918; PMCID: PMC8457042.  Cluver CA, Hannan NJ, van Papendorp E, Hiscock R, Beard S, Mol BW, Theron GB, Hall DR, Decloedt EH, Stander M, Adams KT, Rensburg M, Schubert P, Walker SP, Tong S. Esomeprazole to treat women with preterm preeclampsia: a randomized placebo controlled trial. Am J Obstet Gynecol. 2018 Oct;219(4):388.e1-388.e17. doi: 10.1016/j.ajog.2018.07.019. Epub 2018 Jul 26. Erratum in: Am J Obstet Gynecol. 2023 Oct;229(4):482. doi: 10.1016/j.ajog.2023.07.026. PMID: 30055127.  Klemm GC, Birhanu Z, Ortolano SE, Kebede Y, Martin SL, Mamo G, Dickin KL. Integrating Calcium Into Antenatal Iron-Folic Acid Supplementation in Ethiopia: Women's Experiences, Perceptions of Acceptability, and Strategies to Support Calcium Supplement Adherence. Glob Health Sci Pract. 2020 Sep 30;8(3):413-430. doi: 10.9745/GHSP-D-20-00008. PMID: 33008855; PMCID: PMC7541115. | Some studies were conducted to address effectiveness of some new means of treating HDP primarily blood pressure monitoring and antenatal supplementations | Broadly unanswered |
| T_11 | What is the effectiveness of current prophylactic (preventive) treatment for HDP, and what is the potential for more effective drugs? | HDP synonyms  AND  "Therapeutics"[MeSH Terms]  AND  Ghana / SSA synonyms | July 26th, 2024  16 (Ghana 2019-2024, all study types)   190 (SSA, 2019-2024, all study types) | No relevant review identified  Ghana:  Newman N, Beyuo TK, Nartey BA, Segbedzi-Rich E, Pangori A, Moyer CA, Lori JR, Oppong SA, Lawrence ER. Facilitators and barriers to home blood pressure monitoring among pregnant women in Ghana: a mixed-methods analysis of patient perspectives. BMC Pregnancy Childbirth. 2024 Mar 19;24(1):208. doi: 10.1186/s12884-024-06421-2. PMID: 38504214; PMCID: PMC10949704.  Cluver CA, Hiscock R, Decloedt EH, Hall DR, Schell S, Mol BW, Brownfoot F, Kaitu'u-Lino TJ, Walker SP, Tong S. Use of metformin to prolong gestation in preterm pre-eclampsia: randomised, double blind, placebo controlled trial. BMJ. 2021 Sep 22;374:n2103. doi: 10.1136/bmj.n2103. PMID: 34551918; PMCID: PMC8457042.  SSA:  Hofmeyr GJ, Betrán AP, Singata-Madliki M, Cormick G, Munjanja SP, Fawcus S, Mose S, Hall D, Ciganda A, Seuc AH, Lawrie TA, Bergel E, Roberts JM, von Dadelszen P, Belizán JM; Calcium and Pre-eclampsia Study Group. Prepregnancy and early pregnancy calcium supplementation among women at high risk of pre-eclampsia: a multicentre, double-blind, randomised, placebo-controlled trial. Lancet. 2019 Jan 26;393(10169):330-339. doi: 10.1016/S0140-6736(18)31818-X. PMID: 30696573; PMCID: PMC6346082.  Omotayo MO, Martin SL, Stoltzfus RJ, Ortolano SE, Mwanga E, Dickin KL. With adaptation, the WHO guidelines on calcium supplementation for prevention of pre-eclampsia are adopted by pregnant women. Matern Child Nutr. 2018 Apr;14(2):e12521. doi: 10.1111/mcn.12521. Epub 2017 Nov 28. PMID: 29193667; PMCID: PMC6865867.  Omotayo MO, Dickin KL, Pelletier DL, Martin SL, Kung'u JK, Stoltzfus RJ. Feasibility of integrating calcium and iron-folate supplementation to prevent preeclampsia and anemia in pregnancy in primary healthcare facilities in Kenya. Matern Child Nutr. 2018 Feb;14 Suppl 1(Suppl 1):e12437. doi: 10.1111/mcn.12437. PMID: 29493897; PMCID: PMC6866141.  Cormick G, Moraa H, Zahroh RI, Allotey J, Rocha T, Peña-Rosas JP, Qureshi ZP, Hofmeyr GJ, Mistry H, Smits L, Vogel JP, Palacios A, Gwako GN, Abalos E, Larbi KK, Carroli G, Riley R, Snell KI, Thorson A, Young T, Betran AP, Thangaratinam S, Bohren MA. Factors affecting the implementation of calcium supplementation strategies during pregnancy to prevent pre-eclampsia: a mixed-methods systematic review. BMJ Open. 2023 Dec 22;13(12):e070677. doi: 10.1136/bmjopen-2022-070677. PMID: 38135336; PMCID: PMC10749021.  Global:  Rocha T, Allotey J, Palacios A, Vogel JP, Smits L, Carroli G, Mistry H, Young T, Qureshi ZP, Cormick G, Snell KIE, Abalos E, Pena-Rosas JP, Khan KS, Larbi KK, Thorson A, Singata-Madliki M, Hofmeyr GJ, Bohren M, Riley R, Betran AP, Thangaratinam S; International Calcium in Pregnancy (i-CIP) Collaborative Network. Calcium supplementation to prevent pre-eclampsia: protocol for an individual participant data meta-analysis, network meta-analysis and health economic evaluation. BMJ Open. 2023 May 11;13(5):e065538. doi: 10.1136/bmjopen-2022-065538. PMID: 37169508; PMCID: PMC10186423. | Some studies have addressed therapies such as blood pressure home monitoring and the use of medication such as Metformin, Calcium and Iron-folate including one randomized trial in Ghana. | Partly answered |
| T_12 | What is the best way to manage HDP patients after delivery in Ghana?   (Domains: post-delivery care, family planning, timing to end medication, patient compliance) | HDP synonyms  AND  "Therapeutics"[MeSH Terms]  AND  Ghana / SSA synonyms | July 26th, 2024  16 (Ghana 2019-2024, all study types)   190 (SSA, 2019-2024, all study types) | No relevant review identified  Ghana: N/A  SSA:  Ngene NC, Moodley J. Pre-eclampsia with severe features: management of antihypertensive therapy in the postpartum period. Pan Afr Med J. 2020 Jul 27;36:216. doi: 10.11604/pamj.2020.36.216.19895. PMID: 32963682; PMCID: PMC7490136. | A single study was identified to specifically address the postpartum management of HDP. Local Standard treatment guidelines provide postnatal treatment guidance in general regarding pregnancy. | Broadly unanswered |
| T_13 | How can preconception management be integrated into the standard maternal health services in Ghana? | HDP synonyms  AND  "Therapeutics"[MeSH Terms]  AND  Ghana / SSA synonyms | July 26th, 2024  16 (Ghana 2019-2024, all study types)  190 (SSA, 2019-2024, all study types) | No relevant reviews identified  Ghana: N/A  SSA:  Cormick G, Betrán AP, Harbron J, Seuc A, White C, Roberts JM, Belizán JM, Hofmeyr GJ. The Effect of Calcium Supplementation on Body Weight Before and During Pregnancy in Women Enrolled in the WHO Calcium and Preeclampsia Trial. Food Nutr Bull. 2020 Sep;41(3):332-342. doi: 10.1177/0379572120944671. PMID: 33200626; PMCID: PMC11951462. | No reviews or study were identified directly related to integrating preconception care in standard to address HDP | Broadly unanswered |
| T_14 | To what extent do HDP patients in Ghana adhere to recommended therapy, what factors influence this (barriers/enablers), and how can this be improved?   (Domains: in general, attending appointments, seeking care, taking medication (on time), in relation to side effects, in relation to presence of symptoms) | HDP synonyms  AND  "Therapeutics"[MeSH Terms]  AND  Ghana / SSA synonyms | July 26th, 2024  16 (Ghana 2019-2024, all study types)   190 (SSA, 2019-2024, all study types) | No relevant reviews identified.  Ghana:  Newman N, Beyuo TK, Nartey BA, Segbedzi-Rich E, Pangori A, Moyer CA, Lori JR, Oppong SA, Lawrence ER. Facilitators and barriers to home blood pressure monitoring among pregnant women in Ghana: a mixed-methods analysis of patient perspectives. BMC Pregnancy Childbirth. 2024 Mar 19;24(1):208. doi: 10.1186/s12884-024-06421-2. PMID: 38504214; PMCID: PMC10949704.  SSA:  Klemm GC, Birhanu Z, Ortolano SE, Kebede Y, Martin SL, Mamo G, Dickin KL. Integrating Calcium Into Antenatal Iron-Folic Acid Supplementation in Ethiopia: Women's Experiences, Perceptions of Acceptability, and Strategies to Support Calcium Supplement Adherence. Glob Health Sci Pract. 2020 Sep 30;8(3):413-430. doi: 10.9745/GHSP-D-20-00008. PMID: 33008855; PMCID: PMC7541115.  Birhanu Z, Chapleau GM, Ortolano SE, Mamo G, Martin SL, Dickin KL. Ethiopian women's perspectives on antenatal care and iron-folic acid supplementation: Insights for translating global antenatal calcium guidelines into practice. Matern Child Nutr. 2018 Feb;14 Suppl 1(Suppl 1):e12424. doi: 10.1111/mcn.12424. PMID: 29493899; PMCID: PMC6866194. | Adherence to a known HDP therapy (blood pressure monitoring) was addressed in one recent study in Ghana with additional studies on adherence in SSA regarding calcium supplementation | Partly unanswered |
| T_15 | What non-pharmacological options could support HDP treatment in Ghana?   (Domains: in general, non-pharmacological options including natural therapies, lifestyle including diet, exercise, stress reduction) | HDP synonyms  AND  Ghana / SSA synonyms  HDP synonyms  AND Ghana / SSA synonyms  AND "Therapeutics"[MeSH Terms] | July 26th, 2024  16 (Ghana 2019-2024, all study types)   190 (SSA, 2019-2024, all study types) | No relevant reviews identified.  Ghana:  Lawrence ER, Beyuo TK, Newman N, Klutse MA, Asempa JK, Pangori A, Moyer CA, Lori JR, Oppong SA. Ability and accuracy of patient-performed blood pressure monitoring among pregnant women in urban Ghana. AJOG Glob Rep. 2023 Jun 10;3(3):100243. doi: 10.1016/j.xagr.2023.100243. PMID: 37645652; PMCID: PMC10461245.  Lawrence ER, Atluri N, Compton S, Beyuo TK. Provider-perceived acceptability, feasibility, and appropriateness of home blood pressure monitoring in Ghana. Int J Gynaecol Obstet. 2022 Nov;159(2):603-604. doi: 10.1002/ijgo.14324. Epub 2022 Jul 14. PMID: 35780461.  Atluri N, Beyuo TK, Oppong SA, Compton SD, Moyer CA, Lawrence ER. Benefits and barriers of home blood pressure monitoring in pregnancy: perspectives of obstetric doctors from a Ghanaian tertiary hospital. BMC Pregnancy Childbirth. 2023 Jan 19;23(1):42. doi: 10.1186/s12884-023-05363-5. PMID: 36658509; PMCID: PMC9854160.  Sewor C, Obeng AA, Eliason S, Agbeno EK, Amegah AK. Fruits and vegetables intake improves birth outcomes of women with gestational diabetes mellitus and hypertensive disorders of pregnancy. BMC Nutr. 2024 Jan 2;10(1):2. doi: 10.1186/s40795-023-00814-w. PMID: 38167235; PMCID: PMC10763264.  SSA:  Sevene E, Sharma S, Munguambe K, Sacoor C, Vala A, Macuacua S, Boene H, Mark Ansermino J, Augusto O, Bique C, Bone J, Dunsmuir DT, Lee T, Li J, Macete E, Singer J, Wong H, Nathan HL, Payne BA, Sidat M, Shennan AH, Tchavana C, Tu DK, Vidler M, Bhutta ZA, Magee LA, von Dadelszen P; CLIP Mozambique Working Group. Community-level interventions for pre-eclampsia (CLIP) in Mozambique: A cluster randomised controlled trial. Pregnancy Hypertens. 2020 Jul;21:96-105. doi: 10.1016/j.preghy.2020.05.006. Epub 2020 May 14. PMID: 32464527; PMCID: PMC7471842.  Sitot A, Workye H. Assessment of knowledge, attitude and practice towards ante natal exercise among pregnant women attending antenatal care at Health centers of Mekelle, Tigray Region, Ethiopia, 2020. PLoS One. 2022 Aug 9;17(8):e0262805. doi: 10.1371/journal.pone.0262805. PMID: 35944014; PMCID: PMC9362942.  Negash BT, Alelgn Y. Knowledge, attitude and practice of physical exercises among pregnant women attending prenatal care clinics of public health institutions in Hawassa city, Sidama, Ethiopia, in 2021: descriptive cross-sectional study. BMC Womens Health. 2023 Nov 27;23(1):630. doi: 10.1186/s12905-023-02756-8. PMID: 38012589; PMCID: PMC10683262. | Some recent studies have address non-pharmacological therapies such as blood pressure monitoring, diet and community-level interventions such as proper referral and task-sharing | Partly unanswered |
| T_16 | How can the involvement of a psychologist successfully be implemented as a standard part of HDP treatment in Ghana? | HDP synonyms  AND  "Therapeutics"[MeSH Terms]  AND  Ghana / SSA synonyms | July 26th, 2024  16 (Ghana 2019-2024, all study types)   190 (SSA, 2019-2024, all study types) | No relevant reviews identified  Ghana:  Acheanpong K, Pan X, Kaminga AC, Liu A. Prevalence and risk factors of prenatal depression among pregnant women attending antenatal clinic at Adventist Hospital, Bekwai Municipality, Ghana. Medicine (Baltimore). 2022 Mar 11;101(10):e28862. doi: 10.1097/MD.0000000000028862. PMID: 35451379; PMCID: PMC8913126.  SSA:  Mbarak B, Kilewo C, Kuganda S, Sunguya BF. Postpartum depression among women with pre-eclampsia and eclampsia in Tanzania; a call for integrative intervention. BMC Pregnancy Childbirth. 2019 Jul 29;19(1):270. doi: 10.1186/s12884-019-2395-3. PMID: 31357939; PMCID: PMC6664581. | Some studies address psychological impact of HDP but limited studies address the role of psychologist in supporting the care | Broadly unanswered |
| T_17 | To what extent can complications of HDP be prevented through adequate treatment in Ghana? | HDP synonyms  AND  "Therapeutics"[MeSH Terms]  AND  Ghana / SSA synonyms | July 26th, 2024  16 (Ghana 2019-2024, all study types)   190 (SSA, 2019-2024, all study types) | No relevant review identified  Ghana: None identified  SSA:  Hofmeyr GJ, Betrán AP, Singata-Madliki M, Cormick G, Munjanja SP, Fawcus S, Mose S, Hall D, Ciganda A, Seuc AH, Lawrie TA, Bergel E, Roberts JM, von Dadelszen P, Belizán JM; Calcium and Pre-eclampsia Study Group. Prepregnancy and early pregnancy calcium supplementation among women at high risk of pre-eclampsia: a multicentre, double-blind, randomised, placebo-controlled trial. Lancet. 2019 Jan 26;393(10169):330-339. doi: 10.1016/S0140-6736(18)31818-X. PMID: 30696573; PMCID: PMC6346082.  Aliyu LD, Kadas AS, Abdulsalam M, Abdulllahi HM, Farouk Z, Usman F, Attah RA, Yusuf M, Magashi MK, Miko M. Eclampsia a preventable tragedy: an African overview. J Perinat Med. 2022 Aug 24;51(3):300-304. doi: 10.1515/jpm-2022-0053. PMID: 35998894.  Miyoshi Y, Matsubara K, Takata N, Oka Y. Significance of pre-hospital care to reduce the morbidity of eclampsia in rural Zambia. Pregnancy Hypertens. 2019 Jul;17:100-103. doi: 10.1016/j.preghy.2019.05.008. Epub 2019 May 9. PMID: 31487623.  Metta EO, Muhihi A, Paulo HA, Sudfeld CR, Kaale A, Perumal N, Mwanyika-Sando M, Swai NO, Duggan CP, Masanja H, Wylie BJ, Pembe AB, Fawzi W. Experiences, acceptability and barriers to calcium supplementation during pregnancy in Dar es Salaam, Tanzania. Matern Child Nutr. 2025 Jan;21(1):e13732. doi: 10.1111/mcn.13732. Epub 2024 Sep 24. PMID: 39315506; PMCID: PMC11650066.  Okonofua F, Ekezue BF, Ntoimo LF, Ohenhen V, Agholor K, Imongan W, Ogu R, Galadanci H. Outcomes of a multifaceted intervention to prevent eclampsia and eclampsia-related deaths in Nigerian referral facilities. Int Health. 2024 May 1;16(3):293-301. doi: 10.1093/inthealth/ihad044. PMID: 37386659; PMCID: PMC11062200. | No Ghana-specific studies identified. Some recent single studies have addressed prevention of complication through calcium supplementation, pre-hospital care protocols and multifaceted intervention | Broadly unanswered |
| T_18 | What are the out-of-pocket costs of treatment for HDP patients in Ghana, and what are the consequences for patients who cannot afford their treatment?   (Domains: health insurance coverage, increase in drug prices) | HDP synonyms  AND  Ghana / SSA synonyms  HDP synonyms  AND Ghana / SSA synonyms  AND "Therapeutics"[MeSH Terms] | July 26th, 2024  16 (Ghana 2019-2024, all study types)   190 (SSA, 2019-2024, all study types) | No relevant reviews identified  Ghana:  Adu-Bonsaffoh K, Tamma E, Nwameme A, Dako-Gyeke P, Srofenyoh E, Ansah EK, Grobbee DE, Franx A, Browne JL. Provision and experience of care among women with hypertension in pregnancy: a multi-center qualitative study in Ghana. Reprod Health. 2023 Mar 25;20(1):49. doi: 10.1186/s12978-023-01593-0. PMID: 36966326; PMCID: PMC10039538.  SSA:  Memirie ST, Tolla MT, Desalegn D, Hailemariam M, Norheim OF, Verguet S, Johansson KA. A cost-effectiveness analysis of maternal and neonatal health interventions in Ethiopia. Health Policy Plan. 2019 May 1;34(4):289-297. doi: 10.1093/heapol/czz034. PMID: 31106346; PMCID: PMC6661540.  Gebeyehu N, Urgessa A, Yohannes D, Yalew A, Ahmed M, Admasu M. Lived experiences of women who survived from pre-eclampsia and eclampsia in public hospitals of Shashemene Town, Oromia Region, Ethiopia: a qualitative study. F1000Res. 2025 Apr 7;12:1464. doi: 10.12688/f1000research.129648.3. PMID: 40469934; PMCID: PMC12134722. | Out-of-pocket expenses in treatment of HDP is discussed in two recent studies in the form of patient experiences documented. No explicit economic evaluation identified | Broadly unanswered |
| T_19 | How does the quality of HDP management differ between types of healthcare facilities and rural compared to urban settings in Ghana? | HDP synonyms  AND  "Therapeutics"[MeSH Terms]  AND  Ghana / SSA synonyms | July 26th, 2024  16 (Ghana 2019-2024, all study types)   190 (SSA, 2019-2024, all study types) | No relevant reviews identified  Ghana:  Boachie-Ansah P, Anto BP, Marfo AFA, Dassah ET, Mozu IE, Attakora J. Quality of antenatal care and outcomes of Hypertensive Disorders in Pregnancy among antenatal attendees: A comparison of urban and periurban health facilities in Ghana. PLoS One. 2023 Dec 1;18(12):e0294327. doi: 10.1371/journal.pone.0294327. PMID: 38039304; PMCID: PMC10691682.  Adu-Bonsaffoh K, Tamma E, Nwameme AU, Browne JL. Health professionals' perspectives on clinical challenges in managing hypertensive disorders of pregnancy and recommendations for improving care: A multi-center qualitative study. Front Glob Womens Health. 2022 Nov 10;3:968914. doi: 10.3389/fgwh.2022.968914. PMID: 36440321; PMCID: PMC9686376.  SSA:  Namutebi M, Nalwadda GK, Kasasa S, Muwanguzi PA, Ndikuno CK, Kaye DK. Readiness of rural health facilities to provide immediate postpartum care in Uganda. BMC Health Serv Res. 2023 Jan 10;23(1):22. doi: 10.1186/s12913-023-09031-4. PMID: 36627623; PMCID: PMC9830711.  Salomon A, Ishaku S, Kirk KR, Warren CE. Detecting and managing hypertensive disorders in pregnancy: a cross-sectional analysis of the quality of antenatal care in Nigeria. BMC Health Serv Res. 2019 Jun 24;19(1):411. doi: 10.1186/s12913-019-4217-8. PMID: 31234838; PMCID: PMC6591953. | A single multi center analysis was identified where comparison was made with urban and rural settings. | Partly unanswered |

**C. Literature review findings and justification**

| **PROGNOSIS** | | | | | | |
| --- | --- | --- | --- | --- | --- | --- |
| **ID** | **Uncertainty** | **Search string** | **Search results** | **Evidence: sources** | **Evidence: summary** | **Judgment** |
| P_01 | How adequate are healthcare professionals' knowledge and skills regarding HDP complications and prognosis in Ghana? | HDP synonyms* AND (Prognosis[MeSH] OR prognos*[Title/Abstract] OR complicat*[Title/Abstract] OR sever*[Title/Abstract] OR outcome*[Title/Abstract] OR consequence*[Title/Abstract] OR result*[Title/Abstract] OR mortalit*[Title/Abstract] OR morbidit*[Title/Abstract] OR effect*[Title/Abstract] OR postpartum health[Title/Abstract]) AND (“Health Personnel”[MeSH] OR "clinician*"[Title/Abstract] OR "physician*"[Title/Abstract] OR "doctor*"[Title/Abstract] OR "medical practitioner*"[Title/Abstract] OR "healthcare practitioner*"[Title/Abstract] OR "health practitioner*"[Title/Abstract] OR "healthcare provider*"[Title/Abstract] OR "healthcare worker*"[Title/Abstract] OR "medical professional*"[Title/Abstract] OR "nurse*"[Title/Abstract] OR "midwi*"[Title/Abstract] OR HCP[Title/Abstract] OR "healthcare professional*"[Title/Abstract]) AND Location synonyms* | PubMed:  July 9th, 2024  1 (Ghana 2019-2024, reviews)  22 (Ghana 2019-2024, all study types)  Cochrane:  July 13th, 2024  0 (Ghana 2019-2024, reviews)  0 (Ghana 2019-2024, all study types)  Scopus:  July 13th, 2024  2 (Ghana 2019-2024, reviews)  27 (Ghana 2019-2024, all study types) | **Reviews: Ghana:** none  **All studies: Ghana:** Dartey, A. F., Dzansi, G., Lotse, C. W., Obuobisa, R., Afua Bosu, C. E., & Afaya, A. (2022). Midwives experiences of managing clients with eclampsia in a low resource setting: a qualitative descriptive study. SAGE Open Nursing, 8, 23779608221094542.  Adams, Y. J., & Sladek, L. (2022). A descriptive, cross-sectional study of postpartum education: midwives’ self-reported knowledge and teaching of postpartum complications in Ghana. Reproductive health, 19(1), 77.  Garti, I., Gray, M., Bromley, A., & Tan, J. Y. B. (2022). A qualitative document analysis of policies influencing preeclampsia management by midwives in Ghana. Women and Birth, 35(6), 612-618.  Garti, I., Gray, M., Bromley, A., & Tan, B. (2023). A socioecological description of the influencing factors to midwives’ management of preeclampsia in a Ghanaian tertiary hospital. PLoS One, 18(9), e0291036.  Garti, I., Gray, M., Bromley, A., & Tan, J. Y. B. (2024). Midwives’ experiences of providing pre-eclampsia care in a low-and middle-income country–A qualitative study. Women and Birth, 37(2), 332-339.  Adu-Bonsaffoh, K., Tamma, E., Nwameme, A. U., & Browne, J. L. (2022). Health professionals' perspectives on clinical challenges in managing hypertensive disorders of pregnancy and recommendations for improving care: A multi-center qualitative study. Frontiers in global women's health, 3, 968914.  Adu-Bonsaffoh, K., Tamma, E., Nwameme, A., Dako-Gyeke, P., Srofenyoh, E., Ansah, E. K., ... & Browne, J. L. (2023). Provision and experience of care among women with hypertension in pregnancy: a multi-center qualitative study in Ghana. Reproductive health, 20(1), 49.  Garti, I., Gray, M., Bromley, A., & Tan, J. Y. B. (2024). Pre-eclampsia training needs of midwives in a Ghanaian tertiary hospital: A cross-sectional study. Nurse Education in Practice, 75, 103872.  **Global, LMICs, SSA & West-Africa:** not searched | There aren't any completed studies specifically about the information that women should get about their prognosis. However, evidence is available about HDP education in general and to however, as well as about the effect of education on the prognosis of women with HDP. Most of the information originates from the discussion rather than result sections, and thus aren't the main outcomes of the studies. Examples of the evidence are: the importance of education to pregnant women on the danger signs that require emergency interventions; a lack of basic understanding about maternal hypertension and its complications which impairs treatment adherence; the minimal level of general education on HDP compared to other diseases, and therefore the need for more; a low perceived importance of BP in pregnancy which poses a challenge for home-based BP monitoring; importance of education in preventing and managing eclampsia to improve outcomes and empower clients. Some papers recommended communication strategies for the education to the general public or pregnant women: in the dominant local languages via television, radio and social media for wide coverage; public health campaigns; during antenatal visits was mentioned often as promising because antenatal care attendance in Ghana is relatively high; other WHO-recommended methods of antenatal education such as group antenatal visits and community-based education Because there is no evidence about the specific education that patients should receive about their prognosis, this question is deemed broadly unanswered. The cited papers also call for more research, e.g. on the interpretations pregnant women have of HDP in order to devleop effective information, education and communication materials and strategies.  Important to mention: the SPOT toolkit protocol (see references) does include important parts of the answer to this research question, as it explores the best ways of risk communication. So even though this question isn't answered yet, maybe good to wait with starting new research projects until the findings and recommendations for further research from this project have been published. | Broadly unanswered |
| P_02 | What education needs to be provided to HDP patients in Ghana about their prognosis, and how should this be done?  (Domains: professional and legal responsiblities, timing of education, impact of knowledge on patient and their health-seeking behavior, post-delivery counseling, communication strategies, maternal and fetal prognosis) | HDP synonyms*  AND  (Prognosis[MeSH] OR prognos*[Title/Abstract] OR complicat*[Title/Abstract] OR sever*[Title/Abstract] OR outcome*[Title/Abstract] OR consequence*[Title/Abstract] OR result*[Title/Abstract] OR mortalit*[Title/Abstract] OR morbidit*[Title/Abstract] OR effect*[Title/Abstract] OR postpartum health[Title/Abstract])  AND  (Patient Education as Topic[MeSH] OR Explain*[Title/Abstract] OR inform*[Title/Abstract] OR counsel*[Title/Abstract] OR communicat*[Title/Abstract] OR educat*[Title/Abstract] OR tell*[Title/Abstract] OR advi*[Title/Abstract])  AND  Location synonyms* | PubMed:  July 11th, 2024  1 (Ghana 2019-2024, reviews)  40 (Ghana 2019-2024, all study types)  Cochrane:  July 13th, 2024  0 (Ghana 2019-2024, reviews)  3 (Ghana 2019-2024, all study types)  Scopus:  July 13th, 2024  3 (Ghana 2019-2024, reviews)  60 (Ghana 2019-2024, all study types) | **Reviews:  Ghana:** none **All studies: Ghana:** Ahenkorah, B., Sakyi, S. A., Helegbe, G., Owiredu, E. W., Fondjo, L. A., Ofosu, W., ... & Gyan, B. (2022). Foeto-maternal complications associated with low birth weight: A prospective multicenter study in northern Ghana. Plos one, 17(4), e0266796.  Adams, Y. J., & Sladek, L. (2022). A descriptive, cross-sectional study of postpartum education: midwives’ self-reported knowledge and teaching of postpartum complications in Ghana. Reproductive health, 19(1), 77.  Newman, N., Beyuo, T. K., Nartey, B. A., Segbedzi-Rich, E., Pangori, A., Moyer, C. A., ... & Lawrence, E. R. (2024). Facilitators and barriers to home blood pressure monitoring among pregnant women in Ghana: a mixed-methods analysis of patient perspectives. BMC Pregnancy and Childbirth, 24(1), 208.  Dartey, A. F., Dzansi, G., Lotse, C. W., Obuobisa, R., Afua Bosu, C. E., & Afaya, A. (2022). Midwives experiences of managing clients with eclampsia in a low resource setting: a qualitative descriptive study. SAGE Open Nursing, 8, 23779608221094542.  Agbeno, E. K., Osarfo, J., Owusu, G. B., Opoku Aninng, D., Anane-Fenin, B., Amponsah, J. A., ... & Mohammed, M. (2022). Knowledge of hypertensive disorders of pregnancy among pregnant women attending antenatal clinic at a tertiary hospital in Ghana. SAGE Open Medicine, 10, 20503121221088432.  Joshi, A., Beyuo, T. K., Oppong, S. A., Moyer, C. A., & Lawrence, E. R. (2022). ‘I don’t really understand this BP’: Women’s knowledge, attitudes, and experiences with preeclampsia in Ghana. PLOS Global Public Health, 2(7), e0000121.  Fondjo, L. A., Boamah, V. E., Fierti, A., Gyesi, D., & Owiredu, E. W. (2019). Knowledge of preeclampsia and its associated factors among pregnant women: a possible link to reduce related adverse outcomes. BMC pregnancy and childbirth, 19, 1-7.  Adu-Bonsaffoh, K., Tamma, E., Nwameme, A. U., & Browne, J. L. (2022). Health professionals' perspectives on clinical challenges in managing hypertensive disorders of pregnancy and recommendations for improving care: A multi-center qualitative study. Frontiers in global women's health, 3, 968914.  Atluri, N., Beyuo, T. K., Oppong, S. A., Moyer, C. A., & Lawrence, E. R. (2023). Challenges to diagnosing and managing preeclampsia in a low-resource setting: A qualitative study of obstetric provider perspectives from Ghana. PLOS Global Public Health, 3(5), e0001790.  Tamma, E., Adu-Bonsaffoh, K., Nwameme, A., Dako-Gyeke, P., Srofenyoh, E., & Browne, J. (2023). Maternal hypertensive mother’s knowledge, attitudes and misconceptions on hypertension in pregnancy: A multi-center qualitative study in Ghana. PLOS global public health, 3(1), e0001456.  Joshi, A., Beyuo, T., Oppong, S. A., Moyer, C. A., & Lawrence, E. R. (2020). Preeclampsia knowledge among postpartum women treated for preeclampsia and eclampsia at Korle Bu Teaching Hospital in Accra, Ghana. BMC pregnancy and childbirth, 20, 1-11.  Amoakoh, H. B., De Kok, B. C., Yevoo, L. L., Olde Loohuis, K. M., Srofenyoh, E. K., Arhinful, D. K., ... & Browne, J. L. (2024). Co-creation of a toolkit to assist risk communication and clinical decision-making in severe preeclampsia: SPOT-Impact study design. Global Health Action, 17(1), 2336314.  **Global, LMICs, SSA & West-Africa:** not searched | There are some studies looking at the awareness of HDP prognosis, but most looked at awareness among pregnant women at the ANC or HDP patients rather than the general population. Among pregnant women, one study found that 88.6% had inadequate knowledge about PE, whereas a different study found that 44% had excellent knowledge on HDPs. A third study found that 30-53% of the women were aware of the different complications and adverse outcomes of HDP like maternal/foetal death. Among HDP patients, the studies found that most patients did not know that “BP” could complicate pregnancy and lead to adverse outcomes, as they believe pregnancy is a safe and natural process. The lack of knowledge about potential dangers went hand in hand with disbelief about having hypertension at all, together leading to non-adherence to care.  Some of the communication strategies mentioned for question P2 fit more as answer to this question as they atrget the general public: education in the dominant local languages via television, radio and social media for wide coverage, and public health campaigns.  Still, there is a need to properly study what the best ways are to increase awareness, seeing that above evidence was only suggested in discussion sections. It'll be necessary to include husbands and other non-pregnant women/HDP patients in these studies about awareness-raising activities. | Partly answered |
| P_03 | How can we create awareness about the severity and complications of HDP in Ghana?  (Domains: prognosis during pregnancy and postpartum) | HDP synonyms*  AND  (Health Literacy[MeSH] OR Awareness[MeSH] OR Knowledge[MeSH] OR aware*[Title/Abstract] OR knowledge*[Title/Abstract] OR educat*[Title/Abstract] OR understanding[Title/Abstract] OR insight*[Title/Abstract] OR comprehen*[Title/Abstract] OR information[Title/Abstract] OR familiar*[Title/Abstract])  AND  (Prognosis[MeSH] OR prognos*[Title/Abstract] OR complicat*[Title/Abstract] OR sever*[Title/Abstract] OR outcome*[Title/Abstract] OR consequence*[Title/Abstract] OR result*[Title/Abstract] OR mortalit*[Title/Abstract] OR morbidit*[Title/Abstract] OR effect*[Title/Abstract] OR postpartum health[Title/Abstract])  AND  Location synonyms* | PubMed:  July 13th, 2024  1 (Ghana 2019-2024, reviews)  46 (Ghana 2019-2024, all study types)  Cochrane:  July 13th, 2024  0 (Ghana 2019-2024, reviews)  6 (Ghana 2019-2024, all study types)  Scopus:  July 13th, 2024  3 (Ghana 2019-2024, reviews)  64 (Ghana 2019-2024, all study types) | **Reviews:  Ghana:** none **All studies: Ghana:** Fondjo, L. A., Boamah, V. E., Fierti, A., Gyesi, D., & Owiredu, E. W. (2019). Knowledge of preeclampsia and its associated factors among pregnant women: a possible link to reduce related adverse outcomes. BMC pregnancy and childbirth, 19, 1-7.  Adu-Bonsaffoh, K., Tamma, E., Nwameme, A. U., & Browne, J. L. (2022). Health professionals' perspectives on clinical challenges in managing hypertensive disorders of pregnancy and recommendations for improving care: A multi-center qualitative study. Frontiers in global women's health, 3, 968914.  Tamma, E., Adu-Bonsaffoh, K., Nwameme, A., Dako-Gyeke, P., Srofenyoh, E., & Browne, J. (2023). Maternal hypertensive mother’s knowledge, attitudes and misconceptions on hypertension in pregnancy: A multi-center qualitative study in Ghana. PLOS global public health, 3(1), e0001456.  Atluri, N., Beyuo, T. K., Oppong, S. A., Moyer, C. A., & Lawrence, E. R. (2023). Challenges to diagnosing and managing preeclampsia in a low-resource setting: A qualitative study of obstetric provider perspectives from Ghana. PLOS Global Public Health, 3(5), e0001790.  Boachie-Ansah, P., Anto, B. P., Marfo, A. F. A., Dassah, E. T., Cobbold, C. C., & Asiamah, M. (2023). Prevalence, Awareness, and Control of Hypertensive Disorders amongst Pregnant Women Seeking Healthcare in Ghana. Journal of Pregnancy, 2023(1), 4194443.  Agbeno, E. K., Osarfo, J., Owusu, G. B., Opoku Aninng, D., Anane-Fenin, B., Amponsah, J. A., ... & Mohammed, M. (2022). Knowledge of hypertensive disorders of pregnancy among pregnant women attending antenatal clinic at a tertiary hospital in Ghana. SAGE Open Medicine, 10, 20503121221088432.  **Global, LMICs, SSA & West-Africa:** not searched | There is barely any literature from Ghana specifically on this topic. The few related papers only indirectly contribute knowledge to this topic: one paper on experiences with induction of labour (of which 29% indicated due to preeclampsia), where the vaginal examination was found traumatic and a "psyching" coping strategy was found to be used by the women. A second paper highlights that HDP was more difficult to cope with because of the lack of adequate communication. The 5th Preeclampsia Scientific Symposium evaluation emphasizes the lack of research on the mental health effects of HDP, and refers to anecdotal evidence pointing towards a lack of psychological support from patients' environments and professional support systems, leaving women to cope with HDP by themselves. Another paper found that these women do not easily take the initiative to seek psychological help themselves. The psychological impact of severe obstetric complications in general in Ghana is large, including physical symptoms, difficulty sleeping, anxiety, sadness, and emotional trauma. Much more research in this area is needed to shed light on ways to tackle the psychological impact of HDP. | Broadly unanswered |
| P_04 | What coping strategies do preeclampsia patients and their relatives use in Ghana? | HDP synonyms*  AND  (Coping Skills[MeSH] OR coping[Title/Abstract] OR cope*[Title/Abstract] OR deal*[Title/Abstract] OR manage*[Title/Abstract] OR handle*[Title/Abstract] OR adapt*[Title/Abstract] OR navigat*[Title/Abstract] OR adjust*[Title/Abstract] OR experience*[Title/Abstract] OR endur*[Title/Abstract] OR tolerat*[Title/Abstract] OR mental health[Title/Abstract] OR psychologic*[Title/Abstract])  AND  Location synonyms* | PubMed:  July 13th, 2024  1 (Ghana 2019-2024, reviews)  45 (Ghana 2019-2024, all study types)  Cochrane:  July 13th, 2024  0 (Ghana 2019-2024, reviews)  6 (Ghana 2019-2024, all study types)  Scopus:  July 13th, 2024  5 (Ghana 2019-2024, reviews)  63 (Ghana 2019-2024, all study types) | **Reviews: Ghana:** none **All studies: Ghana:** Atobrah-Apraku, K., Newman, G. T., Opuni-Frimpong, Y., Seffah, J. D., & Adu-Bonsaffoh, K. (2024). Lived experiences of women during induction of labour at a tertiary hospital in Ghana: A qualitative study. PLOS Global Public Health, 4(2), e0002290.  Joshi, A., Beyuo, T. K., Oppong, S. A., Moyer, C. A., & Lawrence, E. R. (2022). ‘I don’t really understand this BP’: Women’s knowledge, attitudes, and experiences with preeclampsia in Ghana. PLOS Global Public Health, 2(7), e0000121.  Koi-Larbi, K., Obiri, D., Browne, J. L., Fondjo, L. A., Katsande, S., Garti, I., & APEC-Ghana. (2024, June). Advancing hypertensive disorders of pregnancy management: insights from the 5th preeclampsia scientific symposium in Ghana. In BMC proceedings (Vol. 18, No. Suppl 10, p. 12). London: BioMed Central.  Adjorlolo, S. (2023). Seeking and receiving help for mental health services among pregnant women in Ghana. PloS one, 18(3), e0280496.  Amegavluie, R. E. A., Ani-Amponsah, M., & Naab, F. (2022). Women’s experiences of surviving severe obstetric complications: a qualitative inquiry in southern Ghana. BMC Pregnancy and Childbirth, 22(1), 212.  **Global, LMICs, SSA & West-Africa:** not searched | There are numbers from single studies in Ghana about different adverse outcomes of HDP. Many are not measured as percentage outcomes of HDP, rather the part of HDP contributing to: ICU admission, preterm birth, stillbirth, maternal mortality, low birth weight,  Where the prognosis of HDP was specifically studied, this included: maternal complications in general, hospital admission, stillbirths, NICU admission, preterm delivery, low Apgar scores, neonatal death, chronic hypertension and chornic kidney disease. Women with pre-eclampsia were found to have lower odds of HIV and malaria infection in pregnancy. One extensive study looked at the chances of preterm birth, maternal mortality and near-miss, stillbirth/neonatal deaths, ICU admission, severe maternal outcomes and maternal mortality in 447 women. Most of the studies are from tertiary hospitals. Prognosis is highly dependent on the quality of the management, and one study emphasized the poorer outcomes for peri-urban compared to urban facilities, so I suggest adding the domain: for different types of healthcare facilities. In general, it is important to have wide scale national prognosis data, so I suggest keeping this question in for prioritization. | Partly unanswered |
| P_05 | What is the current maternal and fetal prognosis of HDP in Ghana?   (Domains: mental health effects, cardiovascular outcomes, for different types of HDP (such as eclampsia), future health postpartum (including postpartum hypertension), number of pregnancies, type of complications, risk of complications, in different types of health facilities) | HDP synonyms*  AND  (Prognosis[MeSH] OR prognos*[Title/Abstract] OR complicat*[Title/Abstract] OR sever*[Title/Abstract] OR outcome*[Title/Abstract] OR consequence*[Title/Abstract] OR result*[Title/Abstract] OR mortalit*[Title/Abstract] OR morbidit*[Title/Abstract] OR effect*[Title/Abstract] OR postpartum health[Title/Abstract])  AND  Location synonyms* | PubMed:  June 23rd, 2024  2 (Ghana 2019-2024, reviews)  76 (Ghana 2019-2024, all study types)  Cochrane:  July 13th, 2024  0 (Ghana 2019-2024, reviews)  6 (Ghana 2019-2024, all study types)  Scopus:  NA | **Reviews:** none **All studies: Ghana:** Anane-Fenin, B., Agbeno, E. K., Osarfo, J., Opoku Anning, D. A., Boateng, A. S., Ken-Amoah, S., ... & Jeffery, E. (2021). A ten-year review of indications and outcomes of obstetric admissions to an intensive care unit in a low-resource country. Plos one, 16(12), e0261974.  Beyuo, T. K., Lawrence, E. R., Oppong, S. A., Kobernik, E. K., Amoakoh-Coleman, M., Grobbee, D. E., ... & Bloemenkamp, K. W. M. (2023). Impact of antenatal care on severe maternal and neonatal outcomes in pregnancies complicated by preeclampsia and eclampsia in Ghana. Pregnancy Hypertension, 33, 46-51.  Boachie-Ansah, P., Anto, B. P., Marfo, A. F. A., Dassah, E. T., Mozu, I. E., & Attakora, J. (2023). Quality of antenatal care and outcomes of Hypertensive Disorders in Pregnancy among antenatal attendees: A comparison of urban and periurban health facilities in Ghana. Plos one, 18(12), e0294327.  Anto, E. O., Ofori Boadu, W. I., Opoku, S., Senu, E., Tamakloe, V. C. K. T., Tawiah, A., ... & Addai-Mensah, O. (2022). Prevalence and risk factors of Preterm Birth among pregnant women admitted at the Labor Ward of the Komfo Anokye Teaching Hospital, Ghana. Frontiers in Global Women's Health, 3, 801092.  Vanotoo, L., Dwomoh, D., Laar, A., Kotoh, A. M., & Adanu, R. (2023). Modeling clinical and non-clinical determinants of intrapartum stillbirths in singletons in six public hospitals in the Greater Accra Region of Ghana: a case–control study. Scientific Reports, 13(1), 1013.  Drechsel, K. C., Adu-Bonsaffoh, K., Loohuis, K. M. O., Srofenyoh, E. K., Boateng, D., & Browne, J. L. (2022). Maternal near-miss and mortality associated with hypertensive disorders of pregnancy remote from term: a multicenter observational study in Ghana. AJOG Global Reports, 2(2), 100045.  Awuah, S. P., Okai, I., Ntim, E. A., & Bedu-Addo, K. (2020). Prevalence, placenta development, and perinatal outcomes of women with hypertensive disorders of pregnancy at Komfo Anokye Teaching Hospital. PLoS One, 15(10), e0233817.  Boafor, T. K., Ntumy, M. Y., Asah-Opoku, K., Sepenu, P., Ofosu, B., & Oppong, S. A. (2021). Maternal mortality at the Korle Bu Teaching Hospital, Accra, Ghana: a five-year review. African Journal of Reproductive Health, 25(1), 56-66.  Boachie-Ansah, P., Anto, B. P., Marfo, A. F. A., Dassah, E. T., Cobbold, C. C., & Asiamah, M. (2023). Prevalence, Awareness, and Control of Hypertensive Disorders amongst Pregnant Women Seeking Healthcare in Ghana. Journal of Pregnancy, 2023(1), 4194443.  Aseidu, E. K., Bandoh, D. A., Ameme, D. K., Nortey, P., Akweongo, P., Sackey, S. O., ... & Kenu, E. (2019). Obstetric determinants of preterm delivery in a regional hospital, Accra, Ghana 2016. BMC pregnancy and childbirth, 19, 1-8.  Lawrence, E. R., Beyuo, T. K., Kobernik, E. K., Moyer, C. A., & Oppong, S. A. (2022). A comparative analysis of neonatal outcomes in pregnancies complicated by preeclampsia and eclampsia in Ghana. AJOG Global Reports, 2(3), 100061.  Amponsah-Tabi, S., Dassah, E. T., Asubonteng, G. O., Ankobea, F., Annan, J. J., Senu, E., ... & Opare-Addo, H. S. (2022). An assessment of the quality of antenatal care and pregnancy outcomes in a tertiary hospital in Ghana. Plos one, 17(10), e0275933.  Bugri, A. A., Gumanga, S. K., Yamoah, P., Frimpong, E. K., & Nlooto, M. (2023). Prevalence of Hypertensive Disorders, Antihypertensive Therapy and Pregnancy Outcomes among Pregnant Women: A Retrospective Review of Cases at Tamale Teaching Hospital, Ghana. International Journal of Environmental Research and Public Health, 20(12), 6153.  Dassah, E. T., Kusi-Mensah, E., Morhe, E. S., & Odoi, A. T. (2019). Maternal and perinatal outcomes among women with hypertensive disorders in pregnancy in Kumasi, Ghana. PloS one, 14(10), e0223478.  Orish, V. N., Ansong‐Boateng, J., Puplampu, P. N., Ibine, B., Azanu, W., Amoh, M. Y., ... & Sanyaolu, A. (2022). HIV and malaria prevalence among pregnant women with and without pre‐eclampsia at the Atua Government Hospital in Ghana’s eastern region. International Journal of Gynecology & Obstetrics, 159(3), 912-917.  Burger, R. J., Gordijn, S. J., Bolijn, R., Reilingh, A., Moll Van Charante, E. P., Van Den Born, B. J. H., ... & Ganzevoort, W. (2023). Cardiovascular risk profile after a complicated pregnancy across ethnic groups: the HELIUS study. European journal of preventive cardiology, 30(6), 463-473.  **West-africa:** not searched **SSA:** not specifically searched (below article identified through different search)Hahka, T. M., Slotkowski, R. A., Akbar, A., VanOrmer, M. C., Sembajwe, L. F., Ssekandi, A. M., ... & Patel, K. P. (2024). Hypertension Related Co-Morbidities and Complications in Women of Sub-Saharan Africa: A Brief Review. Circulation research, 134(4), 459-473.  **Global & LMICs:** not searched | The amount of literature regarding this question is still fast-growing as to find better predictive factors for HDP prognosis. Systematic reviews exist, however most are still about correlations between markers and severity rather than about the markers' performance as prognostic tests. Examples are the blood concentration of arsenic, liver biomarkers, angiogenic/placental growth factor levels. The Congo red dot testalso correlated with disease severity.  A number of reviews highlight the necessity to combine predictive factors (also: biomarkers as well as clinical risk factors) to improve its specificity, however a universally reliable risk predictive tool hasn't been developed yet. Suggested parameters are: maternal demographic, comorbidity-related, and pregnancy-related variables, circulating levels of biomarkers (typically PlGF and pregnancy-associated plasma protein A), proteomics and metabolomics, and uterine artery Doppler flow velocity waveforms (measured at around 13 weeks’ gestation). Clinical implications and cost of implementation are mentioned to require more research.  Altogether, more research in this field is necessary, as the current evidence shows potential for good predictive factors but is not quite there yet. | Broadly unanswered |
| P_06 | What are predictive factors for the severity of HDP?   (Domains: convulsions, gestational age, timing of diagnosis, patient compliance, type of health facility, underlying conditions) | HDP synonyms*  AND  (Prognosis[MeSH] OR prognos*[Title/Abstract] OR complicat*[Title/Abstract] OR sever*[Title/Abstract] OR outcome*[Title/Abstract] OR consequence*[Title/Abstract] OR result*[Title/Abstract] OR mortalit*[Title/Abstract] OR morbidit*[Title/Abstract] OR effect*[Title/Abstract] OR postpartum health[Title/Abstract])  AND  (predicti*[Title/Abstract] OR indicat*[Title/Abstract] OR risk factor*[Title/Abstract] OR convulsi*[Title/Abstract] OR gestational age[Title/Abstract] OR diagnos*[Title/Abstract] OR adhere*[Title/Abstract] OR complian*[Title/Abstract] OR health facility[Title/Abstract] OR comorbidit*[Title/Abstract] OR chronic[Title/Abstract] OR sign*[Title/Abstract])  AND  LMIC + SSA synonyms* | PubMed:  July 14th, 2024  110 (SSA+LMIC 2021-2024, reviews)  1613 (global 2021-2024, reviews)  Cochrane:  July 14th, 2024  4 (SSA+LMIC 2021-2024, reviews)  9 (global 2021-2024, reviews)  Scopus:  NA | **Reviews: Global:** 1613 results = not feasible to screen --> searched for LMIC/SSA **LMIC + SSA:** Alese, M. O., Moodley, J., & Naicker, T. (2021). Preeclampsia and HELLP syndrome, the role of the liver. The Journal of Maternal-Fetal & Neonatal Medicine, 34(1), 117-123.  Liu, H., Pu, Y., Ai, S., Wang, X., He, S., Wang, K., & Dang, Y. (2022). The relationship between preeclampsia and arsenic concentration in the peripheral blood. Biological Trace Element Research, 1-10.  Deshpande, J. S., Sundrani, D. P., Sahay, A. S., Gupte, S. A., & Joshi, S. R. (2021). Unravelling the potential of angiogenic factors for the early prediction of preeclampsia. Hypertension Research, 44(7), 756-769.  Bartal, M. F., & Sibai, B. M. (2022). Eclampsia in the 21st century. American journal of obstetrics and gynecology, 226(2), S1237-S1253.  Chappell, L. C., Cluver, C. A., & Tong, S. (2021). Pre-eclampsia. The Lancet, 398(10297), 341-354.  Petca, A., Sinescu, R. D., Sandru, F., Petca, R. C., Dumitrascu, M. C., Mehedintu, C., & Zvanca, M. E. (2022). New approaches in predicting and diagnosing preeclampsia: Congo Red Dot Paper Test. Experimental and Therapeutic Medicine, 23(4), 1-5.  Mazumder, H., Rimu, F. H., Shimul, M. H., Das, J., Gain, E. P., Liaw, W., & Hossain, M. M. (2024). Maternal health outcomes associated with ambient air pollution: An umbrella review of systematic reviews and meta-analyses. Science of The Total Environment, 169792.  Avendanha, R. A., Campos, G. F. C., Branco, B. C., Ishii, N. C., Gomes, L. H. N., de Castro, A. J., ... & Simões e Silva, A. C. (2024). Potential urinary biomarkers in preeclampsia: a narrative review. Molecular Biology Reports, 51(1), 172.  **All studies** (not specifically searched, below article found through different search): Snell, K. I. E., Allotey, J., Smuk, M., Hooper, R., Chan, C., Ahmed, A., Chappell, L. C., Von Dadelszen, P., Green, M., Kenny, L., Khalil, A., Khan, K. S., Mol, B. W., Myers, J., Poston, L., Thilaganathan, B., Staff, A. C., Smith, G. C. S., Ganzevoort, W., Laivuori, H., … IPPIC Collaborative Network (2020). External validation of prognostic models predicting pre-eclampsia: individual participant data meta-analysis. BMC medicine, 18(1), 302. https://doi.org/10.1186/s12916-020-01766-9 | The risk of HDP recurrence has not been studied within Ghana, West Africa or even SSA. Globally, there is a large knowledge base on this (1017 results between 2019-2024), however the recurrence rate has a context-specific component and should thus still be studied in the context of Ghana. | Broadly unanswered |
| P_07 | What is the risk of recurrence of HDP in Ghana? | HDP synonyms  AND  (Recurrence[MeSH] OR recur*[Title/Abstract] OR reoccur*[Title/Abstract] OR return*[Title/Abstract] OR relaps*[Title/Abstract] OR happen again[Title/Abstract] OR recrudesce*[Title/Abstract] OR happening again[Title/Abstract] OR come back[Title/Abstract] OR coming back[Title/Abstract] OR repeat*[Title/Abstract])  AND  Location synonyms | PubMed:  July 15th, 2024  4 (Ghana 2019-2024, all study types)  8 (west Africa 2019-2024, all study types)  37 (SSA 2019-2024, all study types)  Cochrane:  July 15th, 2024  1 (Ghana 2019-2024, reviews)  11 (west Africa 2019-2024, reviews)  14 (SSA 2019-2024, reviews)  Scopus:  NA | **Reviews:** none  **All study types:**  **Ghana:** none  **West-africa:** none  **SSA:**  Tran, P. L., Robillard, P. Y., Dumont, C., Schweizer, C., Omarjee, A., Iacobelli, S., & Boukerrou, M. (2019). Recurrent or first preeclampsia in multiparae: A case-control study of singleton pregnancies in Reunion Island. European Journal of Obstetrics & Gynecology and Reproductive Biology, 240, 80-86.  Kalengo, N. H., Sanga, L. A., Philemon, R. N., Obure, J., & Mahande, M. J. (2020). Recurrence rate of preterm birth and associated factors among women who delivered at Kilimanjaro Christian Medical Centre in Northern Tanzania: A registry based cohort study. PLoS One, 15(9), e0239037.  Yemane, A., Teka, H., Ahmed, S., Temesgen, H., & Langen, E. (2021). Gestational hypertension and progression towards preeclampsia in Northern Ethiopia: prospective cohort study. BMC pregnancy and childbirth, 21, 1-8. | The risk of HDP recurrence has not been studied within Ghana or West Africa. There is one study from Reunion Island that found recurrent HDP to present with more risk factors than first-time HDP. Two other studies from SSA report similar results, but solely as an extra finding of their project. No reviews have been published on this topic within SSA. Globally, there is a large knowledge base on this topic (1017 results between 2019-2024), however the HDP recurrence rate is most likely influenced by environmental factors, and should therefore be studied in its respective context. | Broadly unanswered |
| P_08 | To what extent does establishing an adequate prognosis prevent complications of HDP in Ghana? | HDP synonyms  AND  (Pregnancy Complications[MeSH] OR complicati*[Title/Abstract] OR adverse outcome*[Title/Abstract] OR adverse birth outcome*[Title/Abstract] OR eclampsia[Title/Abstract] OR HELLP syndrome[Title/Abstract] OR Hemolysis, Elevated Liver Enzymes, Low Platelet Syndrome[Title/Abstract] OR associated condition*[Title/Abstract] OR morbidit*[Title/Abstract] OR mortalit*[Title/Abstract] OR infection*[Title/Abstract] OR miscarriage*[Title/Abstract] OR spontaneous abortion*[Title/Abstract])  AND  (Risk Assessment[MeSH] OR triage[MeSH] OR risk assess*[Title/Abstract] OR prognostic test*[Title/Abstract] OR risk test*[Title/Abstract] OR risk evaluation*[Title/Abstract] OR risk analys*[Title/Abstract] OR risk estimation*[Title/Abstract] OR risk measurement*[Title/Abstract] OR risk calculation*[Title/Abstract] OR risk determination*[Title/Abstract])  AND  Location synonyms" | PubMed:  July 15th, 2024  4 (Ghana 2019-2024, all study types)  5 (west Africa 2019-2024, all study types)  18 (SSA 2019-2024, all study types)  Cochrane:  July 15th, 2024  3 (Ghana 2019-2024, reviews)  11 (west Africa 2019-2024, reviews)  37 (SSA 2019-2024, reviews)  Scopus:  NA | **Reviews:** none  **All study types:**  **Ghana:**  Lawrence, E. R., Beyuo, T. K., Kobernik, E. K., Moyer, C. A., & Oppong, S. A. (2022). A comparative analysis of neonatal outcomes in pregnancies complicated by preeclampsia and eclampsia in Ghana. AJOG Global Reports, 2(3), 100061.  **West-africa:** none  **SSA:**  Bone, J. N., Magee, L. A., Singer, J., Nathan, H., Qureshi, R. N., Sacoor, C., ... & Adetoro, O. O. (2021). Blood pressure thresholds in pregnancy for identifying maternal and infant risk: a secondary analysis of Community-Level Interventions for Pre-eclampsia (CLIP) trial data. The Lancet Global Health, 9(8), e1119-e1128.  Tuyishime, E., Ingabire, H., Mvukiyehe, J. P., Durieux, M., & Twagirumugabe, T. (2020). Implementing the Risk Identification (RI) and Modified Early Obstetric Warning Signs (MEOWS) tool in district hospitals in Rwanda: a cross-sectional study. BMC Pregnancy and Childbirth, 20, 1-9.  Ngwenya, S., Jones, B., Mwembe, D., Nare, H., & Heazell, A. E. (2021). Development and validation of risk prediction models for adverse maternal and neonatal outcomes in severe preeclampsia in a low-resource setting, Mpilo Central Hospital, Bulawayo, Zimbabwe. Pregnancy Hypertension, 23, 18-26. | Evidence on this topic mostly involves studies on the power of prognostic models in identifying cases at risk for severe morbidity and mortality. The knowledge base on this topic is very limited, including three non-review studies in Southern and Eastern SSA countries. Two prediction models were tested with inconclusive results. One randomized controlled trial performed in Ghana shows the relation between the severity of HDP/gestational age, and the chance of adverse neonatal outcome. This advocates for more research on prognostic models to guide more intensive care to the groups that are most at risk of adverse outcomes, thereby preventing the latter. | Broadly unanswered |
| P_09 | How can audits for HDP be implemented in Ghana? | HDP synonyms  AND  (Clinical Audit[MeSH] OR audit*[Title/Abstract] OR health care review*[Title/Abstract] OR healthcare review*[Title/Abstract] OR health-care review*[Title/Abstract] OR performance review*[Title/Abstract] OR case review*[Title/Abstract] OR quality review*[Title/Abstract])  AND  Location synonyms | PubMed:  July 15th, 2024  2 (Ghana 2019-2024, all study types)  7 (west Africa 2019-2024, all study types)  23 (SSA 2019-2024, all study types)  Cochrane:  July 15th, 2024  1 (Ghana 2019-2024, reviews)  12 (west Africa 2019-2024, reviews)  22 (SSA 2019-2024, reviews)  Scopus: NA | **Reviews**: none  **All study types:**  **Ghana:**  Garti, I., Gray, M., Bromley, A., & Tan, J. Y. B. (2024). Pre-eclampsia training needs of midwives in a Ghanaian tertiary hospital: A cross-sectional study. Nurse Education in Practice, 75, 103872.  **West-africa: -**  **SSA:**  Namagembe, I., Kiwanuka, N., Byamugisha, J. K., Ononge, S., Beyeza-Kashesya, J., Kaye, D. K., ... & Nakimuli, A. (2022). Why mothers die at a busy tertiary urban hospital in Kampala, Uganda: a comprehensive review of maternal deaths 2016-2018 and implications for quality improvement to reduce deaths. African Health Sciences, 22(2), 489-499. | The evidence base on this topic is highly limited. There are no published reviews. The only statements made on this topic derive from a cross-sectional study, which concludes that there is high demand among Ghanaian midwives for training in auditing, and a Ugandan study suggesting that "a well-supported, and timely maternal death review process with targeted and pragmatic interventions might be effective in reducing maternal deaths". Strategies and ways to implement this in an SSA context have not been clearly studied yet. | Broadly unanswered |
| P_10 | What is the financial burden of prognostic tests for HDP on health facilities in Ghana, and how can this be improved? | HDP synonyms  AND  (Prognosis[MeSH] OR prognos*[Title/Abstract] OR complicat*[Title/Abstract] OR sever*[Title/Abstract] OR outcome*[Title/Abstract] OR consequence*[Title/Abstract] OR result*[Title/Abstract] OR mortalit*[Title/Abstract] OR morbidit*[Title/Abstract] OR effect*[Title/Abstract] OR postpartum health[Title/Abstract])  AND  (Economics, Hospital[MeSH] OR econom*[Title/Abstract] OR financ*[Title/Abstract] OR cost*[Title/Abstract] OR expense*[Title/Abstract] OR pric*[Title/Abstract] OR expenditure*[Title/Abstract])  AND  Location synonyms | PubMed:  July 15th, 2024  9 (Ghana 2019-2024, all study types)  26 (west Africa 2019-2024, all study types)  74 (SSA 2019-2024, all study types)  Cochrane:  July 15th, 2024  0 (Ghana 2019-2024, reviews)  13 (west Africa 2019-2024, reviews)  28 (SSA 2019-2024, reviews) | **Reviews:**  **Ghana:** none  **West-Africa:** none  **SSA:**  Mori, A. T., Binyaruka, P., Hangoma, P., Robberstad, B., & Sandoy, I. (2020). Patient and health system costs of managing pregnancy and birth-related complications in sub-Saharan Africa: a systematic review. Health Economics Review, 10, 1-15.  **All study types:** none | There is one systematic review written about the costs of pregnancy-related complications, such as eclampsia. This is background information that can help to compare the cost of prognostic tests in order to assess its cost-effectiveness. However, no evidence is available about the cost of prognostic assessments, nor on strategies to reduce this cost. | Broadly unanswered |

**D. Literature review findings and justification**

| **CAUSES AND RISK FACTORS** | | | | | | |
| --- | --- | --- | --- | --- | --- | --- |
| **ID** | **Uncertainty** | **Search string*** | **Search results** | **Evidence: sources** | **Evidence: summary** | **Judgment** |
| C_01 | What are the causes and risk factors of HDP in Ghana?   (Domains: in general, age, culture/religion, diet, drugs/anesthesia, emotions, stress, environment, genetics, fetus, previous history of HDP or other hypertensive disorders, parity, pain, underlying conditions, sexual history/partners, socioeconomic factors, compared to timing of HDP onset) | HDP synonyms*  AND  Location synonyms*  AND  (risk or caus*) | PubMed:  June 14th, 2024  38 (Ghana 2020-2024, reviews) | **Ghana:** Fondjo, L. A., Amoah, B., Tashie, W., & Annan, J. J. (2022). Risk factors for the development of new-onset and persistent postpartum preeclampsia: A case-control study in Ghana. Women's health (London, England), 18, 17455057221109362. https://doi.org/10.1177/17455057221109362  Beyuo, T. K., Lawrence, E. R., Kobernik, E. K., & Oppong, S. A. (2022). Clinical presentation and predictors of eclampsia among women with hypertensive disorders of pregnancy in Ghana. Pregnancy hypertension, 30, 171–176. https://doi.org/10.1016/j.preghy.2022.10.007  **West-africa: SSA:** Aliyu, L. D., Kadas, A. S., Abdulsalam, M., Abdulllahi, H. M., Farouk, Z., Usman, F., Attah, R. A., Yusuf, M., Magashi, M. K., & Miko, M. (2022). Eclampsia a preventable tragedy: an African overview. Journal of perinatal medicine, 51(3), 300–304. <https://doi.org/10.1515/jpm-2022-0053>  Meazaw, M. W., Chojenta, C., Muluneh, M. D., & Loxton, D. (2020). Systematic and meta-analysis of factors associated with preeclampsia and eclampsia in sub-Saharan Africa. PloS one, 15(8), e0237600. https://doi.org/10.1371/journal.pone.0237600  Robillard, P. Y., Dekker, G., Scioscia, M., Bonsante, F., Iacobelli, S., Boukerrou, M., & Hulsey, T. C. (2022). The blurring boundaries between placental and maternal preeclampsia: a critical appraisal of 1800 consecutive preeclamptic cases. The journal of maternal-fetal & neonatal medicine : the official journal of the European Association of Perinatal Medicine, the Federation of Asia and Oceania Perinatal Societies, the International Society of Perinatal Obstetricians, 35(13), 2450–2456. https://doi.org/10.1080/14767058.2020.1786516  Tesfa, E., Nibret, E., Gizaw, S. T., Zenebe, Y., Mekonnen, Z., Assefa, S., Melese, M., Fentahun, N., & Munshea, A. (2020). Prevalence and determinants of hypertensive disorders of pregnancy in Ethiopia: A systematic review and meta-analysis. PloS one, 15(9), e0239048. <https://doi.org/10.1371/journal.pone.0239048>  Gemechu, K. S., Assefa, N., & Mengistie, B. (2020). Prevalence of hypertensive disorders of pregnancy and pregnancy outcomes in Sub-Saharan Africa: A systematic review and meta-analysis. Women's health (London, England), 16, 1745506520973105. https://doi.org/10.1177/1745506520973105  Hounkpatin, O. I., Amidou, S. A., Houehanou, Y. C., Lacroix, P., Preux, P. M., Houinato, D. S., & Bezanahary, H. (2021). Systematic review of observational studies of the impact of cardiovascular risk factors on preeclampsia in sub-saharan Africa. BMC pregnancy and childbirth, 21(1), 97. <https://doi.org/10.1186/s12884-021-03566-2>  **LMICs: N/A Global:** Johnson, J. D., & Louis, J. M. (2022). Does race or ethnicity play a role in the origin, pathophysiology, and outcomes of preeclampsia? An expert review of the literature. American journal of obstetrics and gynecology, 226(2S), S876–S885. https://doi.org/10.1016/j.ajog.2020.07.038  Narang, K., & Szymanski, L. M. (2020). Multiple Gestations and Hypertensive Disorders of Pregnancy: What Do We Know?. Current hypertension reports, 23(1), 1. <https://doi.org/10.1007/s11906-020-01107-4>Harris, M., Henke, C., Hearst, M., & Campbell, K. (2020). Future Directions: Analyzing Health Disparities Related to Maternal Hypertensive Disorders. Journal of pregnancy, 2020, 7864816. <https://doi.org/10.1155/2020/7864816>Traylor, C. S., Johnson, J. D., Kimmel, M. C., & Manuck, T. A. (2020). Effects of psychological stress on adverse pregnancy outcomes and nonpharmacologic approaches for reduction: an expert review. American journal of obstetrics & gynecology MFM, 2(4), 100229. https://doi.org/10.1016/j.ajogmf.2020.100229  **GHS Standard Treatment Guidelines:** "the cause [of preeclampsia] is unknown, but the disease is more commonly associated with the following: primigravidae, maternal age <18 or >35 years, multiple pregnancies, hydatidiform mole, medical disorders (polycystic ovaries, chronic hypertension, DM, kidney disorders), first pregnancy with a new partner, previous history of preeclampsia, family history of preeclampsia" | There are a significant number of systematic reviews conducted globally and in SSA to provide a risk profile. However few conducted in Ghana. Conducted only in specific hospitals | Partly answered |
| C_02 | Is prevention of HDP possible and if so, how?  (Domains: in general, in a first or subsequent pregnancy, through use of contraceptives) | HDP synonyms*  AND  Location synonyms*  AND  (risk or caus*) | PubMed:  June 14th, 2024  18 (Ghana 2020-2024, reviews) | **Ghana: West-africa: SSA:** Aliyu, L. D., Kadas, A. S., Abdulsalam, M., Abdulllahi, H. M., Farouk, Z., Usman, F., Attah, R. A., Yusuf, M., Magashi, M. K., & Miko, M. (2022). Eclampsia a preventable tragedy: an African overview. Journal of perinatal medicine, 51(3), 300–304. https://doi.org/10.1515/jpm-2022-0053  **LMICs:** Gordon, R., Magee, L. A., Payne, B., Firoz, T., Sawchuck, D., Tu, D., Vidler, M., de Silva, D., & von Dadelszen, P. (2014). Magnesium sulphate for the management of preeclampsia and eclampsia in low and middle income countries: a systematic review of tested dosing regimens. Journal of obstetrics and gynaecology Canada : JOGC = Journal d'obstetrique et gynecologie du Canada : JOGC, 36(2), 154–163. https://doi.org/10.1016/S1701-2163(15)30662-9  **Global:** Liabsuetrakul, T., Yamamoto, Y., Kongkamol, C., Ota, E., Mori, R., & Noma, H. (2022). Medications for preventing hypertensive disorders in high-risk pregnant women: a systematic review and network meta-analysis. Systematic reviews, 11(1), 135. https://doi.org/10.1186/s13643-022-01978-5  Vinogradov, R., Holden, E., Patel, M., Grigg, R., Errington, L., Araújo-Soares, V., & Rankin, J. (2024). Barriers and facilitators of adherence to low-dose aspirin during pregnancy: A co-produced systematic review and COM-B framework synthesis of qualitative evidence. PloS one, 19(5), e0302720. https://doi.org/10.1371/journal.pone.0302720  Maharjan, P., Ponganam, M. P., Lambert, P., Vogel, J. P., McIntosh, M., & McDougall, A. (2024). The quality of medicines for the prevention and management of hypertensive disorders of pregnancy: A systematic review. PLOS global public health, 4(2), e0002962. https://doi.org/10.1371/journal.pgph.0002962 | No Ghana paper focusing on prevention. Prevention is discussed globally under the context of quality of medicine and adherence to certain medicine to help prevent pre-eclampsia and/or eclampsia e.g. low-dose aspirin. | Broadly unanswered |
| C_03 | What are biomarkers for risk prediction in HDP, and how reliable are these in Ghana? | HDP synonyms*  AND  Location synonyms*  AND  Biomarker(title/abstract) | Articles identified as part of search for risk factors above | **Ghana:** Fondjo, L. A., Mensah, J. B., Awuah, E. O., & Sakyi, S. A. (2024). Interplay between vitamin D status, vitamin D receptor gene variants and preeclampsia risk in Ghanaian women: A case-control study. PloS one, 19(5), e0303778. https://doi.org/10.1371/journal.pone.0303778  Anto, E. O., Boadu, W. I. O., Hughes, C., Korsah, E. E., Frimpong, J., Ansah, E., Tawiah, A., Tamakloe, V. C. K. T., Acheampong, E., Asamoah, E. A., Opoku, S., Aboagye, E., Albright, E. M., Adua, E., Afrifa-Yamoah, E., Anto, A. O., Annani-Akollor, M. E., Wiafe, Y. A., & Obirikorang, C. (2024). Angiogenic growth factors, oxidative stress and haematobiochemical measures as predictors of preeclampsia with and without foetal growth restriction: A case-control study in a Ghanaian population. Placenta, 145, 130–138. https://doi.org/10.1016/j.placenta.2023.12.007  Adu-Bonsaffoh, K., Kudaya, D. Q., Fidelis, B., Fondjo, L. A., & Ahenkorah, J. (2024). Alteration in maternal serum uric acid levels in pre-eclampsia and associated perinatal outcomes: a cross-sectional study in Ghana. The Pan African medical journal, 47, 49. https://doi.org/10.11604/pamj.2024.47.49.37106  Akilla, M. A., Nchor, I. A. A., Banyeh, M., & Amidu, N. (2024). Immune checkpoint molecules B7-1 and B7-H1 as predictive markers of pre-eclampsia: A case-control study in Ghana. Immunity, inflammation and disease, 12(1), e1142. https://doi.org/10.1002/iid3.1142  Fondjo, L. A., Awuah, E. O., Sakyi, S. A., Senu, E., & Detoh, E. (2023). Association between endothelial nitric oxide synthase (eNOS) gene variants and nitric oxide production in preeclampsia: a case-control study in Ghana. Scientific reports, 13(1), 14740. https://doi.org/10.1038/s41598-023-41920-w  Abdul, G., Osei-Wusu, W., Asare, G. A., Daud, S., Opoku, S., Tamakloe, V. C. K. T., Frimpong, J., Sackey, B., Boadu, W. I. O., Paintsil, V., Annani-Akollor, M. E., Wiafe, Y. A., Anto, E. O., & Addai-Mensah, O. (2023). Biomarkers of oxidative stress and its nexus with haemoglobin variants and adverse foeto-maternal outcome among women with preeclampsia in a Ghanaian population: A multi-centre prospective study. PloS one, 18(3), e0283638. https://doi.org/10.1371/journal.pone.0283638  Osafo, C., Thomford, N. E., Coleman, J., Carboo, A., Guure, C., Okyere, P., Adu, D., Adanu, R., Parekh, R. S., & Burke, D. (2022). APOL1 genotype associated risk for preeclampsia in African populations: Rationale and protocol design for studies in women of African ancestry in resource limited settings. PloS one, 17(12), e0278115. https://doi.org/10.1371/journal.pone.0278115 Anto, E. O., Roberts, P., Coall, D., Turpin, C. A., Adua, E., Wang, Y., & Wang, W. (2019). Integration of suboptimal health status evaluation as a criterion for prediction of preeclampsia is strongly recommended for healthcare management in pregnancy: a prospective cohort study in a Ghanaian population. EPMA Journal, 10, 211-226.  **West-africa: SSA:** Nabulo, H., Ruzaaza, G., Mugabi, F., & Bajunirwe, F. (2021). Perceptions on preeclampsia and eclampsia among senior, older women, in rural Southwestern Uganda. Journal of global health reports, 5, e2021009. https://doi.org/10.29392/001c.19464 **Global & LMICs:** Hackelöer, M., Schmidt, L., & Verlohren, S. (2023). New advances in prediction and surveillance of preeclampsia: role of machine learning approaches and remote monitoring. Archives of gynecology and obstetrics, 308(6), 1663–1677. https://doi.org/10.1007/s00404-022-06864-y  Kleuskens, D. G., Van Veen, C. M. C., Groenendaal, F., Ganzevoort, W., Gordijn, S. J., Van Rijn, B. B., Lely, A. T., Schuit, E., & Kooiman, J. (2023). Prediction of fetal and neonatal outcomes after preterm manifestations of placental insufficiency: systematic review of prediction models. Ultrasound in obstetrics & gynecology : the official journal of the International Society of Ultrasound in Obstetrics and Gynecology, 62(5), 644–652. https://doi.org/10.1002/uog.26245  Hendershot, J. M., Abbasi, M., Fortier, L., Benn, M., Giacobone, C., Del Mastro, R., Bahrami-Samani, E., Mazloom, A. R., & Oberoi, P. (2022). Analytical validation of a novel panel of biomarkers for a test for preeclampsia. Journal of pharmaceutical and biomedical analysis, 214, 114729. https://doi.org/10.1016/j.jpba.2022.114729 | There are individual studies on specific markers in Ghana. Not all are intended for risk prediction though. No collection of evidence in Ghana (scoping or systematic review) available to inform further clinical care and intervention. | Partly unanswered |
| C_04 | To what extent do healthcare professionals in Ghana educate pregnant women and HDP patients about the causes and risk factors of HDP, and how can this be improved? | HDP synonyms*  AND  Location synonyms*  ANDeducat* | PubMed:  June 14th, 2024  0 (Ghana 2020-2024, reviews)  18 (SSA, 2020-2024, reviews) | **Ghana:** Adams, Y. J., & Sladek, L. (2022). A descriptive, cross-sectional study of postpartum education: midwives' self-reported knowledge and teaching of postpartum complications in Ghana. Reproductive health, 19(1), 77. https://doi.org/10.1186/s12978-022-01376-z  Garti, I., Gray, M., Bromley, A., & Tan, J. B. (2024). Pre-eclampsia training needs of midwives in a Ghanaian tertiary hospital: A cross-sectional study. Nurse education in practice, 75, 103872. https://doi.org/10.1016/j.nepr.2024.103872  **West-africa: N/A SSA: N/A LMICs:** Garti, I., Gray, M., Bromley, A., & Tan, J. B. (2024). Midwives' experiences of providing pre-eclampsia care in a low- and middle-income country - A qualitative study. Women and birth : journal of the Australian College of Midwives, 37(2), 332–339. https://doi.org/10.1016/j.wombi.2023.11.001  **Global:** Wilson R. D. (2020). The Real Maternal Risks in a Pregnancy: A Structured Review to Enhance Maternal Understanding and Education. Journal of obstetrics and gynaecology Canada : JOGC = Journal d'obstetrique et gynecologie du Canada : JOGC, 42(11), 1364–1378.e7. https://doi.org/10.1016/j.jogc.2019.12.005  McCauley, H., Lowe, K., Furtado, N., Mangiaterra, V., & van den Broek, N. (2022). What are the essential components of antenatal care? A systematic review of the literature and development of signal functions to guide monitoring and evaluation. BJOG : an international journal of obstetrics and gynaecology, 129(6), 855–867. https://doi.org/10.1111/1471-0528.17029  Jahromi, A. S., Jokar, M., Sharifi, N., Omidmokhtarloo, B., & Rahmanian, V. (2023). Global knowledge, attitude, and practice towards COVID-19 among pregnant women: a systematic review and meta-analysis. BMC pregnancy and childbirth, 23(1), 278. https://doi.org/10.1186/s12884-023-05560-2 | Primarily knowledge levels of HCPs but not on strategies to deliver the education. | Broadly unanswered |
| C_05 | How can women be counselled pre-conception on HDP in Ghana? | HDP synonyms* AND "preconception care"[MeSH Terms] OR "preconception care"[Title/Abstract] OR "preconcept*"[Title/Abstract] AND  "counseling"[MeSH Terms] OR "referral and consultation"[MeSH Terms] OR "counselling"[Title/Abstract] OR "coun*"[Title/Abstract] OR "advice"[Title/Abstract]  AND  Location synonyms* | PubMed:  June 12th, 2024  0 (Ghana 2019-2024, all study types)  0 (west Africa 2019-2024, all study types)  0 (SSA 2019-2024, all study types) | **Ghana: N/A** Beyuo, T., Tandoh, T., Lawrence, E.R. KNOWLEDGE AND UTILIZATION OF PRECONCEPTION CARE SERVICES AMONG PREGNANT WOMEN ATTENDING ANTENATAL CARE AT THE KORLE BU TEACHING HOSPITAL (2021) Postgraduate Medical Journal of Ghana, 10 (2), pp. 126-131. https://www.scopus.com/inward/record.uri?eid=2-s2.0-85189167674&doi=10.60014%2fpmjg.v10i2.263&partnerID=40&md5=5b692579b4857d95b844ea115c05b3ef DOI: 10.60014/pmjg.v10i2.263  **Global, LMICs, SSA & West-Africa:** not searched | N/A | Broadly unanswered |
| C_06 | How can we best address myths and misconceptions about the causes and risk factors of HDP in Ghana? | N/A | N/A | **Ghana: West-africa:** Sripad, P., Kirk, K., Adoyi, G., Dempsey, A., Ishaku, S., & Warren, C. E. (2019). Exploring survivor perceptions of pre-eclampsia and eclampsia in Nigeria through the health belief model. BMC pregnancy and childbirth, 19(1), 431. https://doi.org/10.1186/s12884-019-2582-2 **Global, LMICs & SSA:** not searched | N/A | Broadly unanswered |
| C_07 | What is the current level of awareness about causes and risk factors of HDP in Ghana, and how can this be increased?   (Domains: in general, education by whom and where, accessibility of information) | N/A | N/A | **Ghana:** Joshi, A., Beyuo, T., Oppong, S. A., Owusu, A., Moyer, C. A., & Lawrence, E. (2021). Exploring self‐blame and the perceived causes of preeclampsia in urban Ghana.  Joshi, A., Beyuo, T., Oppong, S. A., Moyer, C. A., & Lawrence, E. R. (2020). Preeclampsia knowledge among postpartum women treated for preeclampsia and eclampsia at Korle Bu Teaching Hospital in Accra, Ghana. BMC pregnancy and childbirth, 20(1), 625. <https://doi.org/10.1186/s12884-020-03316-w>  Boachie-Ansah, P., Anto, B. P., Marfo, A. F. A., Dassah, E. T., Cobbold, C. C., & Asiamah, M. (2023). Prevalence, Awareness, and Control of Hypertensive Disorders amongst Pregnant Women Seeking Healthcare in Ghana. Journal of pregnancy, 2023, 4194443. https://doi.org/10.1155/2023/4194443  **West-Africa: N/A SSA:** Pallangyo, A. S., & Seif, S. A. (2023). Knowledge and Attitude of Healthcare Providers on Managing Pre-Eclampsia and Eclampsia During Antenatal Care in Mwanza Region-Tanzania. SAGE open nursing, 9, 23779608231193745. https://doi.org/10.1177/23779608231193745 **LMICs: Global:** Sripad, P., Kirk, K., Adoyi, G., Dempsey, A., Ishaku, S., & Warren, C. E. (2019). Exploring survivor perceptions of pre-eclampsia and eclampsia in Nigeria through the health belief model. BMC pregnancy and childbirth, 19(1), 431. https://doi.org/10.1186/s12884-019-2582-2  Umamah, F., Santoso, B., Yunitasari, E., Nisa, F., & Wulandari, Y. (2022). The effectiveness of psycho-educational counseling in pregnant women with preeclampsia: A systematic review. Journal of public health research, 11(3), 22799036221104161. https://doi.org/10.1177/22799036221104161 | N/A | Broadly unanswered |
| C_08 | What is the emotional and psychological impact of HDP in Ghana? | N/A | N/A | **Ghana:** Joshi, A., Beyuo, T., Oppong, S. A., Owusu, A., Moyer, C. A., & Lawrence, E. (2021). Exploring self‐blame and the perceived causes of preeclampsia in urban Ghana.  Atobrah-Apraku, K., Newman, G. T., Opuni-Frimpong, Y., Seffah, J. D., & Adu-Bonsaffoh, K. (2024). Lived experiences of women during induction of labour at a tertiary hospital in Ghana: A qualitative study. PLOS global public health, 4(2), e0002290. https://doi.org/10.1371/journal.pgph.0002290  Adu-Bonsaffoh, K., Tamma, E., Nwameme, A., Dako-Gyeke, P., Srofenyoh, E., Ansah, E. K., Grobbee, D. E., Franx, A., & Browne, J. L. (2023). Provision and experience of care among women with hypertension in pregnancy: a multi-center qualitative study in Ghana. Reproductive health, 20(1), 49. https://doi.org/10.1186/s12978-023-01593-0  Adu-Bonsaffoh, K., Tamma, E., Nwameme, A., Dako-Gyeke, P., Srofenyoh, E., Ansah, E. K., Grobbee, D. E., Franx, A., & Browne, J. L. (2023). Provision and experience of care among women with hypertension in pregnancy: a multi-center qualitative study in Ghana. Reproductive health, 20(1), 49. <https://doi.org/10.1186/s12978-023-01593-0>  **West-Africa: SSA:** Stewart, G. H., Gadama, L. A., & Kerry, V. (2019). Puerperal Psychosis: A brief review and unusual case report. Malawi medical journal : the journal of Medical Association of Malawi, 31(2), 161–163. https://doi.org/10.4314/mmj.v31i2.11  **LMICs: Global:** Sakurai, S., Shishido, E., & Horiuchi, S. (2022). Experiences of women with hypertensive disorders of pregnancy: a scoping review. BMC pregnancy and childbirth, 22(1), 146. https://doi.org/10.1186/s12884-022-04463-y  Williamson, S. P., Moffitt, R. L., Broadbent, J., Neumann, D. L., & Hamblin, P. S. (2023). Coping, wellbeing, and psychopathology during high-risk pregnancy: A systematic review. Midwifery, 116, 103556. https://doi.org/10.1016/j.midw.2022.103556  Srajer, A., Johnson, J. A., & Yusuf, K. (2022). Preeclampsia and postpartum mental health: mechanisms and clinical implications. The journal of maternal-fetal & neonatal medicine : the official journal of the European Association of Perinatal Medicine, the Federation of Asia and Oceania Perinatal Societies, the International Society of Perinatal Obstetricians, 35(25), 8443–8449. https://doi.org/10.1080/14767058.2021.1978067 | N/A | Broadly unanswered |
| C_09 | To what extent can counselling for HDP patients and survivors in Ghana be used to reduce fear of HDP recurrence? | N/A | N/A | **Ghana:** Joshi, A., Beyuo, T., Oppong, S. A., Owusu, A., Moyer, C. A., & Lawrence, E. (2021). Exploring self‐blame and the perceived causes of preeclampsia in urban Ghana. **West-africa: SSA: LMICs: Global:** Brown, M. C., Bell, R., Collins, C., Waring, G., Robson, S. C., Waugh, J., & Finch, T. (2012). Women’s Perception of Future Risk Following Pregnancies Complicated by Preeclampsia. Hypertension in Pregnancy, 32(1), 60–73. https://doi-org.proxy.library.uu.nl/10.3109/10641955.2012.704108  Whyler, N. C. A., Krishnaswamy, S., Price, S., & Giles, M. L. (2024). Strategies to improve postpartum engagement in healthcare after high-risk conditions diagnosed in pregnancy: a narrative review. Archives of gynecology and obstetrics, 310(1), 69–82. https://doi.org/10.1007/s00404-024-07562-7 | N/A | Broadly unanswered |
| C_10 | What is the role of patient involvement, risk communication and shared decision making regarding HDP in Ghana? | N/A | PubMed:  June 17th, 2024  170 (Ghana 2019-2024, all study types) | **Ghana:** Amoakoh, H. B., De Kok, B. C., Yevoo, L. L., Olde Loohuis, K. M., Srofenyoh, E. K., Arhinful, D. K., Koi-Larbi, K., Adu-Bonsaffoh, K., Amoakoh-Coleman, M., & Browne, J. L. (2024). Co-creation of a toolkit to assist risk communication and clinical decision-making in severe preeclampsia: SPOT-Impact study design. Global health action, 17(1), 2336314. https://doi.org/10.1080/16549716.2024.2336314  Koi-Larbi, K., Obiri, D., Browne, J. L., Fondjo, L. A., Katsande, S., Garti, I., & APEC-Ghana (2024). Advancing hypertensive disorders of pregnancy management: insights from the 5th preeclampsia scientific symposium in Ghana. BMC proceedings, 18(Suppl 10), 12. https://doi.org/10.1186/s12919-024-00295-0  **West-Africa: SSA:** Mooij, R., Kapanga, R. R., Mwampagatwa, I. H., Mgalega, G. C., van Dillen, J., Stekelenburg, J., & de Kok, B. C. (2022). Role of male partners in the long-term well-being of women who have experienced severe pre-eclampsia and eclampsia in rural Tanzania: a qualitative study. Journal of obstetrics and gynaecology : the journal of the Institute of Obstetrics and Gynaecology, 42(5), 906–913. https://doi.org/10.1080/01443615.2021.1958766  Marshall, I. J., Wolfe, C. D., & McKevitt, C. (2012). Lay perspectives on hypertension and drug adherence: systematic review of qualitative research. BMJ (Clinical research ed.), 345, e3953. https://doi.org/10.1136/bmj.e3953  **LMICs:** Shahil Feroz, A., Afzal, N., & Seto, E. (2022). Exploring digital health interventions for pregnant women at high risk for pre-eclampsia and eclampsia in low-income and-middle-income countries: a scoping review. BMJ open, 12(2), e056130. https://doi.org/10.1136/bmjopen-2021-056130  **Global:** Eleni Tsigas, Laura A. Magee, (2011) Advocacy organisations as partners in pre-eclampsia progress: patient involvement improves outcomes, Best Practice & Research Clinical Obstetrics & Gynaecology, Volume 25, Issue 4, Pages 523-536  Dullabh, P., Heaney-Huls, K. K., Chiao, A. B., Callaham, M. G., Desai, P., Gauthreaux, N. A., Kashyap, N., Lobach, D. F., & Boxwala, A. (2023). Implementation and evaluation of an electronic health record-integrated app for postpartum monitoring of hypertensive disorders of pregnancy using patient-contributed data collection. JAMIA open, 6(4), ooad098. https://doi.org/10.1093/jamiaopen/ooad098  Brown, M. C., Bell, R., Collins, C., Waring, G., Robson, S. C., Waugh, J., & Finch, T. (2012). Women’s Perception of Future Risk Following Pregnancies Complicated by Preeclampsia. Hypertension in Pregnancy, 32(1), 60–73. https://doi-org.proxy.library.uu.nl/10.3109/10641955.2012.704108 | N/A | Broadly unanswered |

*** Frequently used search terms (PubMed format):**

**HDP:**

(Hypertension, Pregnancy-Induced[MeSH] OR "Pregnancy-Induced Hypertension"[Title/Abstract] OR "Gestational Hypertension"[Title/Abstract] OR "Pregnancy Hypertension"[Title/Abstract] OR "PIH"[Title/Abstract] OR "HDP"[Title/Abstract] OR "Preeclampsia"[Title/Abstract] OR "Pre-eclampsia"[Title/Abstract] OR "Eclampsia"[Title/Abstract] OR "HELLP Syndrome"[Title/Abstract] OR "Hemolysis, Elevated Liver Enzymes, Low Platelet Syndrome"[Title/Abstract] OR "Toxemia of Pregnancy"[Title/Abstract] OR "Pregnancy Toxemia"[Title/Abstract] OR "Toxaemia of Pregnancy"[Title/Abstract] OR "Hypertensive Disorders in Pregnancy"[Title/Abstract] OR "Hypertensive Disorders of Pregnancy"[Title/Abstract] OR "Gestational Hypertensive Disorders"[Title/Abstract] OR "Pregnancy-Associated Hypertension"[Title/Abstract] OR "Pregnancy-Related Hypertension"[Title/Abstract] OR "Hypertension during Pregnancy"[Title/Abstract] OR "Pregnancy-Related Hypertensive Disease"[Title/Abstract] OR "Pregnancy-Related Hypertensive Disorders"[Title/Abstract] OR "Gestational Hypertension Disorders"[Title/Abstract] OR "Pregnancy-Associated Hypertensive Disorders"[Title/Abstract] OR "Pregnancy-Related Hypertensive Conditions"[Title/Abstract] OR "Hypertensive Conditions of Pregnancy"[Title/Abstract] OR "Hypertension in Pregnancy"[Title/Abstract] OR "Hypertension Disorders in Pregnancy"[Title/Abstract])

**Ghana:**

(Ghana[MeSH] OR Ghana*[Title/Abstract])

**West Africa:**

(“Africa, Western”[MeSH] OR “West Africa”[Title/Abstract] OR “Western Africa”[Title/Abstract] OR “West-Africa”[Title/Abstract] OR "Benin"[Title/Abstract] OR "Burkina Faso"[Title/Abstract] OR "Cape Verde"[Title/Abstract] OR Cabo Verde [Title/Abstract] OR "The Gambia"[Title/Abstract] OR "Ghana"[Title/Abstract] OR "Guinea"[Title/Abstract] OR "Guinea-Bissau"[Title/Abstract] OR "Ivory Coast"[Title/Abstract] OR "Liberia"[Title/Abstract] OR "Mali"[Title/Abstract] OR "Mauritania"[Title/Abstract] OR "Niger"[Title/Abstract] OR "Nigeria"[Title/Abstract] OR "Senegal"[Title/Abstract] OR "Sierra Leone"[Title/Abstract] OR "Togo"[Title/Abstract])

**Sub-Saharan Africa:**

(Africa South of the Sahara [MeSH] OR Sub-Saharan Africa [Title/Abstract] OR Subsaharan Africa*[Title/Abstract] OR Angola [Title/Abstract] OR Benin [Title/Abstract] OR Botswana [Title/Abstract] OR Burkina Faso [Title/Abstract] OR Burundi [Title/Abstract] OR Cameroun [Title/Abstract] OR Cameroon [Title/Abstract] OR Cabo Verde*[Title/Abstract] OR Cape Verde*[Title/Abstract] OR Central African Republic*[Title/Abstract] OR Chad*[Title/Abstract] OR Comoros*[Title/Abstract] OR Congo*[Title/Abstract] OR Côte d'Ivoire*[Title/Abstract] OR Djibouti*[Title/Abstract] OR Equatorial Guinea*[Title/Abstract] OR Eritrea*[Title/Abstract] OR Ethiopia*[Title/Abstract] OR Gabon*[Title/Abstract] OR The Gambia*[Title/Abstract] OR Ghana*[Title/Abstract] OR Guinea*[Title/Abstract] OR Guinea-Bissau*[Title/Abstract] OR Kenya*[Title/Abstract] OR Lesotho*[Title/Abstract] OR Liberia*[Title/Abstract] OR Madagascar*[Title/Abstract] OR Malawi*[Title/Abstract] OR Mali*[Title/Abstract] OR Mauritania*[Title/Abstract] OR Mauritius*[Title/Abstract] OR Mozambique*[Title/Abstract] OR Namibia*[Title/Abstract] OR Niger*[Title/Abstract] OR Nigeria*[Title/Abstract] OR Réunion*[Title/Abstract] OR Rwanda*[Title/Abstract] OR Sao Tome and Principe*[Title/Abstract] OR Senegal*[Title/Abstract] OR Seychelles*[Title/Abstract] OR Sierra Leone*[Title/Abstract] OR Somalia*[Title/Abstract] OR South Africa*[Title/Abstract] OR South Sudan*[Title/Abstract] OR Sudan*[Title/Abstract] OR Swaziland*[Title/Abstract] OR Eswatini*[Title/Abstract] OR Tanzania*[Title/Abstract] OR Togo*[Title/Abstract] OR Uganda*[Title/Abstract] OR Western Sahara*[Title/Abstract] OR Zambia*[Title/Abstract] OR Zimbabwe*[Title/Abstract])

**LMICs:**

(“Developing Countries”[MeSH] OR "low-income countr*"[Title/Abstract] OR "low income countr*"[Title/Abstract] OR "middle-income countr*"[Title/Abstract] OR "middle income countr*"[Title/Abstract] OR "LMIC*"[Title/Abstract] OR "global south*"[Title/Abstract] OR "low-resource countr*"[Title/Abstract] OR "low-resource setting*"[Title/Abstract] OR "resource-limited setting*"[Title/Abstract] OR “Developing countr*”[Title/Abstract]
