# Supplementary material for: A Priority Setting Partnership for care improvement of Hypertensive Disorders of Pregnancy in Ghana - A National Research Agenda
Source: Research Square preprint supplement (doi:10.21203/rs.3.rs-6998814/v1), 2025-08-11
Supplement: Supplementary file 3 [file ca64daa98fc8a19533fbb002.docx]

## **Supplementary Material 3 – Questions & Priorities list**

|  |  |
| --- | --- |
| 1. Submissions without research uncertainty identified | Page 2 |
| 1. True uncertainty list | Page 7 |
| 1. Second survey outcome rankings | Page 24 |
| 1. Interim priority list | Page 29 |
| 1. Final priority list: plain language version | Page 34 |
| 1. Small group rankings and interim collated ranking | Page 36 |
| 1. Post-workshop adjustments to the indicative questions | Page 40 |

1. **Submissions without research uncertainty identified**

| Patients and carers | |
| --- | --- |
| Category | **Submissions** |
| PROGNOSIS | - It was through this discussion he had to deliver me at 36W5D. During my antenatal visit on the 29th of Feb 2024 he realised the pressure was too high and the need to terminate the pregnancy to prevent possible complications. - They are closely monitored ye - Okay, thanks - True - Because of the high blood pressure, I went under cesarean section at 36 weeks of my pregnancy and both me and the baby survived.  The is Female. - This will help speed up treatment. - I am okay - Me and my baby are doing well - Yes - Because of this condition they did me C/S - They did me operation - The earlier the diagnosis the effective the treatment - Very well understood - She had it when she was 28 weeks but was given treatment |
| DIAGNOSIS | - First thing to check - This will depend on the gestational age of the client, whether she has walked for a distance and immediately checking the B/P. - Yea - Yes - True - My blood pressure started rising when i was 6 months pregnant - I was diagnosed at 26 weeks of pregnancy - What is my blood pressure level? - No concern - Patient was diagnosed of high BP during ANC - The health care provider always do check my BP anytime I visit the health center - My BP was checked the first day I took Antenatal card - I developed high BP at 32 weeks of pregnancy |
| TREATMENT | - Yes, put on medications and other therapies - I don't have any questions - Yes. But my Dr. did not give me, he said I should rather monitor it because it can have an effect on the foetus. - I was put on drugs. - True - That is very good. She's monitored daily to avoid any risk. - At first, I felt like my heart was beating fast, but now with the drugs it is okay. - The treatment is fine by me because it stabilises the condition. - The purpose of diagnosing a condition is treatment. A better treatment result in improved health outcome. - Mediation - I was put on drugs - Yes - The treatment is being good and helpful. My BP was under control as I am taking the medication - I have been talking the medicine they have me - Patient was referred to bigger facility and was given Nifedipine 20mg as treatment - I also been through some form of treatment to help manage the BP. - That’s highly recommended so as to save her life and that of the unborn baby - Was not given any treatment because it wasn't so high |
| CAUSES AND RISK FACTORS | - Some also have low BP. Why is that? - Possibly so - This will also help reduce more cases. - Thus, is not the first time that I see it. I also know some other friends. One year ago, I lost someone to this. So, we are still learning - I understand the condition because they are well-explained. - I was educated to come to clinic early on my nest pregnancy - Yes - No concern - No question - By doing check up on herself - Causes are unknown but there are predisposing factors - My mother is hypotension patient - Her mother was having it so I learnt it 's hereditary - Some are pregnancy induced and it ran through all 3 pregnancies l had - I've had preeclampsia twice and the second time, I also had gestational diabetes |

| Professionals | |
| --- | --- |
| Category | **Question/concern** |
| DIAGNOSIS | - Has the patient had high BP previously? Was the diastolic pressure equal or more than 90mmhg, and the systolic pressure equal or more than 140mmHg? Was the BP taken property? Did the patient take antihypertensive medications before pregnancy? Has the patient had swelling on the face, hands or feed? Has the patient had protein in the urine? Has the patient had epigastric pain, headache, or blurred vision? Is there any family history of HPT? How many pregnancies has the patient had before? When was the first time the BP was raised? What is the BP at booked? - 1. Pregnancy is not a sickness so they are clients (Pregnant women). 2. Clients BP need to be checked if they have rest well enough and if it high then you let her rest for sometimes then you recheck. - Diagnosis should include current BP comparison with booking visit Blood pressure reading, gestational age usually 20weeks and beyond, with or without urine protein. Other symptoms too should be checked. - What type of hypertensive disorder are we dealing with? - Find out if patient has a history of HBP and if patient is on any medication - Foamy urine, blurred vision or blackout, scant urine, epigastric pain, previous history of preeclampsia - No comment - No questions - Do you have a history of high blood pressure? - High blood pressure - Pre-eclampsia - Severe pre-eclampsia - Postpartum eclampsia - Specific diagnosis of HDP - PIH - Eclampsia - Yes - Is there any dizziness, urine analysis to show the presence of protein, severe headache etc and consider the psychological state of the client since hospital admissions causes anxiety in most cases. - Does she have symptoms of end organ damage? What is her urine protein? - Headache, blurry vision and swollen face, feet and hand - History taking, Previous histories, medical history - If client has headache, blur vision, swollen of the extremities, palpitation. Etc - Pre-eclampsia with severe features - 5 minutes - During second trimester - Another sign of PIH is proteinuria |
| TREATMENT | - Did the patient receive prophylactic treatment? When was the prophylactic treatment started? Did she take methyldopa? Which dose? Did she take Nifedipine or other medicine? Which dose Is she on a diet regimen or a daily BP chart? or exercise? Did she receive treatment with Magnesium Sulphate? Dose and when? Did she undergo fetal surveillance? BPP, Fetal biometry, UAD, NST? Did she consult with an Obstetrics or Maternal-Fetal Medicine specialist? - None identified - Mgso4 and anti-hypertension - We also need to do some investigations while we are trying to control the blood pressure and taking steps for the definitive management. - Treating women with magnesium sulphate and nifecard we want to undergo spontaneous vaginal birth (hindering uterine contractions) - Antihypertensives, steroids, magnesium sulphate, education - No Comment - Yes - Any known deficiencies or allergies? - Anti-Hypertensive treatments - Tab Nifedipine Tab methyldopa Injection MGSO4 Inj hydralazine Tab Amlodipine Tab atenolol - Pre-eclampsia - Eclampsia - Yes. There are treatment protocols to follow. - Magnesium Sulphate - Refer for further laboratory investigation and counsel on lifestyle modification - Constant BP monitoring with appropriate anti hypertensives and anticonvulsants - Protocol for treatment - Tab Neficard XL Inj. Labetalol - Magnesium sulphate protocol - WHO treatment is recommended - The treatment protocol |
| PROGNOSIS | - It is crucial to consider the risk factors for PEC and deliver in a timely manner. - This is appropriate - Previous history of preeclampsia, any comorbidities, - No comment - Has she had abruptio placentae or IUFD - TRUE - Yes - Bp-130/90 -200/110bpm Urine protein-+, +++ Swollen of the extremities Severe frontal headache - I may lose my baby or myself. - Why do hdp affects a lot of organs - We all known to improve the outcome for both mother and baby. The best is to monitor and deliver as early as possible in order to minimise any life-threatening risk to mother and then baby. However, at times the difficulty and the risk to mother is greater so mother must be saved at the expense of the baby. - The outcome is based on how urgent the client reported for treatment or how the case is effectively managed - Scanty urine output less than 50mls, Low respiratory rate - Okay - Early diagnosis - Timely management of eclampsia - Within 24hrs - Eclampsia - HIP - Good when detected earlier - Satisfactory - Regular exercise Eating adequate diet Drinking a lot of water Avoid smoking Avoid oily food - Bad |
| CAUSES AND RISK FACTORS | - As a client, you can't really prevent Hypertensive disorders in pregnancy - No concern noted. - Previous hypertension and kidney problem - Cause maybe known or unknown but the early onset of this condition can be prevented in subsequent pregnancies. - Family history of Hypertension, family history of preeclampsia, previous pregnancies with preeclampsia. - No comment - High blood pressure in pregnancy risk factors 1 teenage pregnancy, previous history of HDP - Is there family history of preeclampsia - TRUE - Yes - Risk Factors 1. Preterm labour 2. Eclamptic fit 3. IUFD 4. IUGR 5. Emergency c/s 6. Maternal/fetal death - Maternal age above 35 - Eclampsia - I will make sure I follow the instructions by the doctor and nurses so that I and my baby will be fine. - Elderly Primid Twin gestation History of a known hypertension - Previous history of pre-eclampsia, client presenting with elevated blood pressure, epigastric pain, blurred vision - Maternal age Obesity Lifestyle Smoking Alcohol Hyperlipidemia - Previous experience Age Sedentary lifestyle - More of this should be implemented to enhance good health. - High PB with protein in urine - Protein in urine, high BP and oedema - New partners 2. Family history 3. lifestyle |

1. **True uncertainty list (Post categorization and literature search)**

**Legend:**

|  |
| --- |
|  |
|  |

= level 1: main category (diagnosis, treatment, prognosis, causes & risk factors)

= level 2: sub-category 1

= level 3: sub-category 2

| **DIAGNOSIS** (12 questions) | | | | |
| --- | --- | --- | --- | --- |
| **Competent, motivated human resources** | | | | |
| **Staff challenges to accurate diagnosis** | | | | |
| **D1** | | **Professionals** | | **Patients and carers** |
| **What are the challenges for healthcare professionals in Ghana in diagnosing HDP?**  (Domains: diagnostic accuracy, absence of diagnostic criteria, early/timely diagnosis, knowledge and expertise, clear diagnostic criteria, collaboration between different cadres) | | **What difficulties do health workers in Ghana face in finding out (detecting) if a woman has high blood pressure in pregnancy?**  (This includes challenges with getting an exact diagnosis, having not enough or unclear guidelines, with diagnosing early or on time, with having enough knowledge and expertise, with the amount of collaboration between healthcare workers) |
| **Evidence-based practices** | | | | |
| **Diagnostic accuracy** | | | | |
| **D2** | | **Professionals** | | **Patients and carers** |
| **What is the accuracy of screening and diagnosis of HDP among women in Ghana, and how can this be improved?**  (Domains: frequency of checks, type of checks, number of checks needed for diagnosis, location of screening, timing of diagnosis, possibility of home screening/diagnosis, accuracy and functionality of hospital diagnostic tests, hospital infrastructure) | | **How accurate is the screening, check-up and diagnosis of high blood pressure among pregnant women in Ghana, and how can this be improved?**  (This includes how often are women checked, what kind of checks, number of checks needed for diagnosis, where are women checked, when are women diagnosed, are checks or diagnosis at home an option, how exact are hospital tests for diagnosis and how well do they work, the role of the hospital set-up) |
| **D3** | | **What are strategies to improve antenatal care attendance in Ghana?**  (Domains: vulnerable groups (adolescents, inhabitants of rural areas/informal settlements, low socioeconomic status). role of religion/polygyny, health insurance coverage, innovative measures, male participation) | | **How can we improve the number of pregnant women in Ghana that go to antenatal checks?**  (This includes groups at risk (young women, people living in villages or slums, poor people, low education), role of religion and marriage with multiple wives, having health insurance or not, setting up new programs, involvement of husbands) |
| **Myths about the diagnosis** | | | | |
| **D4** | | **Professionals** | | **Patients and carers** |
| **Which myths exist in Ghana regarding the diagnosis of HDP?** | | **Which misunderstandings and incorrect beliefs exist in Ghana about the diagnosis (detection) of high blood pressure?** |
| **Variation in diagnosis** | | | | |
| **D5** | | **Professionals** | | **Patients and carers** |
| **What are the existing inequities in screening, diagnostic criteria, timing and accuracy of HDP diagnosis in Ghana, and how can these be improved?**  (Domains: vulnerable groups (adolescents, minority ethnic groups, migrants, non-attenders of ANC), regional differences, rural dwellers, healthcare facility level) | | **What unfair differences exist among different people and different places in Ghana when it comes to correctly detecting high blood pressure in pregnancy on time, and how can we make these differences less?**  (This includes groups at risk (young women, smaller ethnic groups, migrants), across different regions, people living in cities compared to villages, different types of health centers) |
| **Early/Timely diagnosis** | | | | |
| **Cause for delay in diagnosis** | | | | |
| **D6** | | **Professionals** | | **Patients and carers** |
| **What are the causes of delay in HDP diagnosis in Ghana?** | | **What are the reasons for diagnosing (detecting) high blood pressure in pregnancy late in Ghana?** |
| **Possibility of early detection/diagnosis** | | | | |
| **D7** | | **Professionals** | | **Patients and carers** |
| **What are the possibilities for early diagnosis of HDP in Ghana (before presence of symptoms)?** | | **How can we diagnose (detect) high blood pressure early in pregnancy (before the woman notices anything)?** |
| **Effective communication** | | | | |
| **Informing client about diagnosis** | | | | |
| **D8** | | **Professionals** | | **Patients and carers** |
| **To what extent do healthcare professionals in Ghana explain the diagnosis of HDP to patients, and how can this be improved?** | | **How well do health workers in Ghana explain the condition to women with high blood pressure, and how can we improve this?** |
| **Language and medical jargons** | | | | |
| **D9** | | **Professionals** | | **Patients and carers** |
| **How can healthcare providers make sure that their questions and explanations are understandable for all HDP patients in Ghana?** | | **How can health workers in Ghana explain high blood pressure in pregnancy to patients in a simple way they can understand?** |
| **Public education and awareness** | | | | |
| **D10** | | **Professionals** | | **Patients and carers** |
| **What is the current level of awareness about HDP in Ghana, and how can this be increased?** | | **How much do people in Ghana know about high blood pressure in pregnancy, and how can we improve this?** |
| **Complications** | | | | |
| **Prevention of complications** | | | | |
| **D11** | | **Professionals** | | **Patients and carers** |
| **To what extent can complications be prevented through accurate and timely diagnosis of HDP in Ghana?** | | **How can quickly detecting high blood pressure help prevent bad outcomes of high blood pressure in pregnancy as much as possible?** |
| **Physical resources** | | | | |
| **Cost of diagnostic tests** | | | | |
| **D12** | | **Professionals** | | **Patients and carers** |
| **What is the financial burden of diagnostic tests for HDP patients in Ghana, and how can this be improved?** | | **How much does it cost Ghanaian women to do the tests for detecting/diagnosing high blood pressure in pregnancy, and how can this be made cheaper for them?** |
| **TREATMENT** (19 questions) | | | | |
| **Competent, motivated human resources** | | | | |
| **Competent, motivated human resources** | | | | |
| **T1** | | **Professionals** | | **Patients and carers** |
| **What are the challenges for healthcare professionals in Ghana regarding the provision of adequate treatment for HDP?**  (Domains: knowledge and skills, hospital equipment, clear protocols and adherence to these, timing of treatment, compared to rural areas, different health facility levels, antenatal/intrapartum management consequences for fetus) | | **What are the challenges that health workers in Ghana face with treating high blood pressure in pregnancy in the right way and on time?**  (This includes challenges with having enough knowledge and expertise, materials and medicines available at the hospital, unclear guidelines and following these, difference between cities and villages, types of health centers, what are the risks for the baby) |
| **Functional referral systems** | | | | |
| **Referral of HDP patients** | | | | |
| **T2** | | **Professionals** | | **Patients and carers** |
| **When are and should HDP patients in Ghana be referred to other health facility levels?** | | **When are and should women with high blood pressure be referred (sent) to a different type of hospital in Ghana?** |
| **Effective communication** | | | | |
| **Informing clients about treatment** | | | | |
| **T3** | | **Professionals** | | **Patients and carers** |
| **To what extent do healthcare professionals in Ghana educate HDP patients about their treatment, and how can this be improved?**  (Domains: importance of treatment, treatment plan, management explanation including side effects of treatment, lifestyle/exercise, delivery options, consensus and adherence) | | **How well do health workers in Ghana explain to women with high blood pressure in pregnancy how it will be treated, and how can this be improved?**  (This includes: how important the medicines are, which medicines the woman should take and for how long, explaining the care plan of HDP and which complaints you can get from the medicines, what the woman will need to change in her daily life (such as do sports), what the options are for delivering her baby, and to agree with the woman about her care plan and that she will stick to it) |
| **Emotional support, respect and dignity** | | | | |
| **Personal experience of care postpartum** | | | | |
| **T4** | | **Professionals** | | **Patients and carers** |
| **What are the postpartum experiences of HDP patients in Ghana?** | | **What are the experiences of women with high blood pressure in pregnancy in Ghana after they gave birth?** |
| **Role of partner in care** | | | | |
| **T5** | | **Professionals** | | **Patients and carers** |
| **What role do patients' partners play in the treatment of HDP in Ghana?** | | **What do husbands and other relatives of women with high blood pressure in pregnancy in Ghana do in the care for the women?** |
| **Evidence based interventions** | | | | |
| **Adverse Effects of Therapy** | | | | |
| **T6** | | **Professionals** | | **Patients and carers** |
| **What are the adverse effects of commonly used HDP medication in Ghana?**  (Domains: in general, dosage, duration of use, long-term side effects, mental health effects, hypertension in pregnancy as side effect) | | **What problems (side effects) can the medicines used for high blood pressure in pregnancy in Ghana give?**  (This includes in general, the amount of medicine, how long the woman should take it, effects over a long period, effects on the mind and emotions, and can it lead to higher BP) |
| **Existing therapies** | | | | |
| **T7** | | **Professionals** | | **Patients and carers** |
| **What are the best ways to manage HDP patients in Ghana with the existing therapies?**  (Domains: in general, intensity of monitoring, in relation to severity of HDP, gestational age, recovery, types and order of drugs, administration routes, dosage, in relation to resources, timing of treatment (in relation to BP level and type of HDP), chronic underlying conditions) | | **How can we care for women with high blood pressure in pregnancy in Ghana in the best way possible?**  (This includes: in general, how often we should repeat tests, what kind of care a more or less serious type of HDP needs, for different periods in pregnancy, how the woman can get well again afterwards, types of medicines and when to take which one, ways to take the medicine, amount of medicine, using little supplies and money, when to start the medicine (at which BP level for which type of HDP), and when a woman has another condition) |
| **T8** | | **How are HDP patients currently managed in Ghana?**  (Domains: in general, types of drugs, monitoring of patients, variation between regions, cultures, religions and healthcare facilities, timing of medication (compared to BP and gestational age), timing of delivery) | | **How are women with high blood pressure in pregnancy in Ghana cared for right now?**  (This includes in general, what kinds of medicines, how often the tests are repeated, is this different in different regions, tribes, religions and kinds of health centers, when the medicine is started (at which point in pregnancy and which BP level), and when a woman is being delivered) |
| **T9** | | **What is the effectivity of current treatments for HDP in Ghana?**  (Domains: in general, effect on symptoms including BP or complications, effect of magnesium sulphate on convulsions, factors influencing response to treatment) | | **How good is the treatment for high blood pressure in pregnancy as it is now in Ghana?**  (This includes in general, effect on the complaints that the woman has, her BP and bad outcomes, effect of magnesium sulphate (eclampsia medicine) on fits, and is there anything that can make the medicines work better for one woman than the other) |
| **Other pharmacological options** | | | | |
| **T10** | | **Professionals** | | **Patients and carers** |
| **What are possibilities for developing new medication for HDP?**  (Domains: curative drugs, more effective drugs, prophylactic drugs, home-based treatment, way of delivery/dose, minimal side effects) | | **Can we create new medicines for high blood pressure in pregnancy, and if so, how can we do this?**  (This includes medicines that make HDP completely go away, medicines that are more successful in treating HDP, medicines that can prevent HDP, medicines for which the woman can stay at home, different amount and ways to take medicine, medicines with less side effects) |
| **Preventative therapies** | | | | |
| **T11** | | **Professionals** | | **Patients and carers** |
| **What is the effectiveness of current prophylactic (preventive) treatment for HDP, and what is the potential for more effective drugs?** | | **Are there existing medicines for avoiding (preventing) HDP, and how can we make better ones?** |
| **Postpartum management** | | | | |
| **T12** | | **Professionals** | | **Patients and carers** |
| **What is the best way to manage HDP patients after delivery in Ghana?**  (Domains: post-delivery care, family planning, timing to end medication, patient compliance) | | **What is the best way to care for women with high blood pressure in pregnancy in Ghana after they gave birth?**  (This includes care right after giving birth and over a longer period after birth, how to counsel about family planning, when the woman should stop taking medicines, how to make sure that the woman comes to appointments and takes the medicines) |
| **T13** | | **How can preconception management be integrated into the standard maternal health services in Ghana?** | | **How can we make sure that all women in Ghana receive care before they get pregnant, so that their bodies are ready for pregnancy?** |
| **Treatment Compliance** | | | | |
| **T14** | | **Professionals** | | **Patients and carers** |
| **To what extent do HDP patients in Ghana adhere to recommended therapy, what factors influence this (barriers/enablers), and how can this be improved?**  (Domains: in general, attending appointments, seeking care, taking medication (on time), in relation to side effects, in relation to presence of symptoms) | | **Do women with high blood pressure in pregnancy in Ghana follow the instructions from the health workers, and how can we improve this?**  (This includes in general, how often do women come to appointments, how often do they go to the clinic when something is wrong, how well do they take their medicines (on time), what happens when a woman feels side effects, what happens when she feels signs of HDP (such as headache)) |
| **Non-pharmacological options** | | | | |
| **T15** | | **Professionals** | | **Patients and carers** |
| **What non-pharmacological options could support HDP treatment in Ghana?**  (Domains: in general, non-pharmacological options including natural therapies, lifestyle including diet, exercise, stress reduction) | | **How can we use non-drug treatments in the care for women in Ghana with high blood pressure in pregnancy?**  (This includes in general, natural medicines, changes in way of living such as food, sports and lessening stress) |
| **T16** | | **How can the involvement of a psychologist successfully be implemented as a standard part of HDP treatment in Ghana?** | | **How can we make sure that all women in Ghana with high blood pressure in pregnancy receive care from a psychologist (therapist)?** |
| **Complications** | | | | |
| **Prevention of complications** | | | | |
| **T17** | | **Professionals** | | **Patients and carers** |
| **To what extent can complications of HDP be prevented through adequate treatment in Ghana?** | | **How well can we avoid bad outcomes of high blood pressure in pregnancy by providing good care to women with HDP in Ghana?** |
| **Physical resources** | | | | |
| **Cost of treatment** | | | | |
| **T18** | | **Professionals** | | **Patients and carers** |
| **What are the out-of-pocket costs of treatment for HDP patients in Ghana, and what are the consequences for patients who cannot afford their treatment?**  (Domains: health insurance coverage, increase in drug prices) | | **How much do patients need to pay for treatment for high blood pressure in pregnancy, and what happens when they cannot afford this cost?**  (This includes does health insurance (NHIS) pay for this, are the medicines becoming more expensive) |
| **Capabilities of different facilities** | | | | |
| **T19** | | **Professionals** | | **Patients and carers** |
| **How does the quality of HDP management differ between healthcare facilities and rural compared to urban settings in Ghana?** | | **How different is the care for women in Ghana with high blood pressure in pregnancy in different places and different types of hospitals?** |
| **PROGNOSIS** (10 questions) | | | | |
| **Competent human resources** | | | | |
| **Staff capability to identify complication and prognosis** | | | | |
| **P1** | **Professionals** | | | **Patients and carers** |
| **How adequate are healthcare professionals' knowledge and skills regarding HDP complications and prognosis in Ghana?** | | | **How well do healthcare workers in Ghana know the possible outcomes of HDP and how to avoid a bad outcome?** |
| **Effective Communication** | | | | |
| **Informing client about prognosis** | | | | |
| **P2** | **Professionals** | | | **Patients and carers** |
| **What education needs to be provided to HDP patients in Ghana about their prognosis, and how should this be done?**  (Domains: professional and legal responsibilities, timing of education, impact of knowledge on patient and their health-seeking behavior, post-delivery counseling, communication strategies, maternal and fetal prognosis) | | | **What kind of information should women with HDP in Ghana get about the possible outcomes of their condition, and how should they get this information?**  (This includes the tasks and legal duties of health workers, when to give this information, what does the information change in the way that women look for healthcare, role of giving information after women gave birth, what is the right way to give information, should the outcomes for the mother and/or baby be told) |
| **Public education and awareness** | | | | |
| **P3** | **Professionals** | | | **Patients and carers** |
| **How can we create awareness about the severity and complications of HDP in Ghana?**  (Domains: prognosis during pregnancy and postpartum) | | | **How can we make sure that people in Ghana know how serious high blood pressure in pregnancy is and what can happen?**  (This includes what can happen while the woman is pregnant, what can happen after she gave birth) |
| **Emotional support** | | | | |
| **Coping mechanisms** | | | | |
| **P4** | **Professionals** | | | **Patients and carers** |
| **What coping strategies do preeclampsia patients, their partners and relatives use in Ghana?** | | | **How do women with preeclampsia and their families in Ghana deal with having this condition?** |
| **Evidence-based practices** | | | | |
| **Current prognosis** | | | | |
| **P5** | **Professionals** | | | **Patients and carers** |
| **What is the current maternal and fetal prognosis of HDP in Ghana?**  (Domains: mental health effects, cardiovascular outcomes, for different types of HDP (such as eclampsia), future health postpartum (including postpartum hypertension), number of pregnancies, type of complications, risk of complications) | | | **What is the health outcome of having high blood pressure in pregnancy for the mother and the baby in Ghana nowadays?**  (This includes risks for mental health, risks for the heart and blood vessels, risks of different types of HDP, health of women after they delivered (such as keeping high BP), the kinds of outcomes, the chances that something will happen) |
| **Prognostic factors** | | | | |
| **P6** | **Professionals** | | | **Patients and carers** |
| **What are predictive factors for the severity of HDP?**  (Domains: convulsions, gestational age, timing of diagnosis, patient compliance, type of health facility, underlying conditions) | | | **Are there ways to predict how serious high blood pressure in pregnancy will turn out to be once the patient has it?**  (This includes fitting, moment HDP starts, when women are diagnosed, how well women take their medicines, women having other conditions) |
| **P7** | **What is the risk of recurrence of HDP in Ghana?** | | | **How big is the chance that high blood pressure in pregnancy will come back in a next pregnancy in Ghana?** |
| **Prevention of complications** | | | | |
| **P8** | **Professionals** | | | **Patients and carers** |
| **To what extent does establishing an adequate prognosis prevent complications of HDP in Ghana?** | | | **How well can we avoid bad outcomes for women with high blood pressure by correctly testing how serious her condition is?** |
| **Quality improvement** | | | | |
| **P9** | **Professionals** | | | **Patients and carers** |
| **How can audits for HDP be implemented in Ghana?** | | | **How can we make sure that audits (sessions where health workers come together to talk about what happened with patients to see how they can do better next time) are done for every patient with high blood pressure in pregnancy in Ghana?** |
| **Physical resources** | | | | |
| **Cost of prognostic tests** | | | | |
| **P10** | **Professionals** | | | **Patients and carers** |
| **What is the financial burden of prognostic tests for HDP on health facilities in Ghana, and how can this be improved?** | | | **How much does it cost hospitals in Ghana to test for each woman how serious the high blood pressure in pregnancy might become, and how can we make this cheaper?** |
| **CAUSES AND RISK FACTORS** (10 questions) | | | | |
| **Evidence-based Intervention** | | | | |
| **Potential cause** | | | | |
| **C1** | **Professionals** | | **Patients and carers** | |
| **What are the causes and risk factors of HDP in Ghana?**  (Domains: in general, age, culture/religion, diet, drugs/anesthesia, emotions, stress, environment, genetics, fetus, previous history of HDP or other hypertensive disorders, parity, pain, underlying conditions, sexual history/partners, socioeconomic factors, compared to timing of HDP onset) | | **Why do women get high blood pressure in pregnancy and what makes the chance bigger that a woman gets it?**  (This includes in general, age, culture/religion, food, medicines and pain relief, emotions, stress, things around you, family with HDP, the baby, having had HDP or high BP before, number of children, pain, other diseases that the woman has, number of men the woman slept with and other sexual experiences, salary and education of the woman, and is this different when HDP starts earlier or later in pregnancy) | |
| **Prevention** | | | | |
| **C2** | **Professionals** | | **Patients and carers** | |
| **Is prevention of HDP possible and if so, how?**  (Domains: in general, in a first or subsequent pregnancy, use of contraceptives) | | **Can we avoid that a woman gets high blood pressure in pregnancy and if so, how?**  (This includes in general, for the first pregnancy or a later one, use of family planning) | |
| **Risk prediction** | | | | |
| **C3** | **Professionals** | | **Patients and carers** | |
| **What are biomarkers for risk prediction in HDP, and how reliable are these in Ghana?** | | **Is it possible to develop a test to see how big the chance is that a woman will get high blood pressure in pregnancy, and how good are these tests?** | |
| **Effective communication** | | | | |
| **Informing patient about cause/risk factors** | | | | |
| **C4** | **Professionals** | | **Patients and carers** | |
| **To what extent do healthcare professionals in Ghana educate pregnant women and HDP patients about the causes and risk factors of HDP, and how can this be improved?** | | **How well do health workers in Ghana explain the causes and risk of high blood pressure in pregnancy to patients and how can this be improved?** | |
| **Pre-conceptional counselling** | | | | |
| **C5** | **Professionals** | | **Patients and carers** | |
| **How can women be counselled pre-conception on HDP in Ghana?** | | **How can women in Ghana already get counselled on high blood pressure in pregnancy before they become pregnant?** | |
| **Myths about HDP** | | | | |
| **C6** | **Professionals** | | **Patients and carers** | |
| **How can we best address myths or misconceptions about the causes and risk factors of HDP in Ghana?** | | How can we correct the myths and incorrect beliefs about why women get high blood pressure in pregnancy in Ghana? | |
| **Public education and awareness** | | | | |
| **C7** | **Professionals** | | **Patients and carers** | |
| **What is the current level of awareness about causes and risk factors of HDP in Ghana, and how can this be increased?**  (Domains: in general, education by whom and where information is access) | | **How much do people in Ghana know about why women get high blood pressure in their pregnancy, and how can we improve this?**  (This includes in general, who should give education and where can they reach the people, do people know where to find information about HDP) | |
| **Emotional Support, Respect and Dignity** | | | | |
| **Emotional Impact of HDP** | | | | |
| **C8** | **Professionals** | | **Patients and carers** | |
| **What is the emotional and psychological impact of HDP in Ghana?** | | **What is the effect of high blood pressure in pregnancy on emotions and mental well-being in Ghana?** | |
| **C9** | **To what extent can counselling for HDP patients and survivors be used to reduce fear of HDP reoccurrence?** | | **How can we use education to make patients or survivors of high blood pressure in pregnancy less afraid that they will get it again?** | |
| **C10** | **What is the role of patient involvement, risk communication and shared decision making regarding HDP in Ghana?** | | **How can patients in Ghana be involved more in making decisions about the care they receive for their high blood pressure in pregnancy?** | |

1. **Second survey outcome rankings**

Patients/carers:

| Rank | Question | Votes |
| --- | --- | --- |
| 1 | What problems (side effects) can the medicines used for high blood pressure in pregnancy in Ghana give? | 34 |
| 1 | Why do women get high blood pressure in pregnancy and what makes the chance bigger that a woman gets it? | 34 |
| 3 | How accurate is the screening, check-up and diagnosis (detection) of high blood pressure among pregnant women in Ghana, and how can this be improved? | 30 |
| 4 | How can we make sure that people in Ghana know how serious high blood pressure in pregnancy is and what can happen? | 26 |
| 4 | Can we avoid that a woman gets high blood pressure in pregnancy and if so, how? | 26 |
| 6 | How well do health workers in Ghana explain the condition to pregnant women with high blood pressure, and how can we improve this? | 25 |
| 6 | How much do people in Ghana know about high blood pressure in pregnancy, and how can we improve this? | 25 |
| 6 | What do husbands and other relatives of women with high blood pressure in pregnancy in Ghana do in the care for the women? | 25 |
| 6 | How well do healthcare workers in Ghana know the possible outcomes of HDP and how to avoid a bad outcome? | 25 |
| 6 | What is the effect of high blood pressure in pregnancy on emotions and mental well-being in Ghana? | 25 |
| 11 | What kind of information should women with HDP in Ghana get about the possible outcomes of their condition, and how should they get this information? | 24 |
| 12 | What difficulties do health workers in Ghana face in finding out (detecting) if a woman has high blood pressure in pregnancy? | 23 |
| 12 | How well do health workers in Ghana explain to women with high blood pressure in pregnancy how it will be treated, and how can this be improved? | 23 |
| 12 | How do women with preeclampsia and their families in Ghana deal with having this condition? | 23 |
| 12 | Is it possible to develop a test to see how big the chance is that a woman will get high blood pressure in pregnancy, and how good are these tests? | 23 |
| 16 | What are the challenges that health workers in Ghana face with treating high blood pressure in pregnancy in the right way and on time? | 22 |
| 16 | How can we use non-drug treatments in the care for women with high blood pressure in pregnancy in Ghana? | 22 |
| 18 | What unfair differences exist among different people and different places in Ghana when it comes to correctly detecting high blood pressure in pregnancy on time, and how can we make these differences less? | 21 |
| 18 | How can quickly detecting high blood pressure help prevent bad outcomes of high blood pressure in pregnancy as much as possible? | 21 |
| 18 | How can we correct the myths and incorrect beliefs about why women get high blood pressure in pregnancy in Ghana? | 21 |
| 21 | How can we diagnose (detect) high blood pressure early in pregnancy (before the woman notices anything)? | 20 |
| 21 | How much does it cost Ghanaian women to do the tests for diagnosing (detecting) high blood pressure in pregnancy, and how can this be made cheaper for them? | 20 |
| 21 | How big is the chance that high blood pressure in pregnancy will come back in a next pregnancy in Ghana? | 20 |
| 24 | How can we improve the number of pregnant women in Ghana that go to antenatal checks? | 19 |
| 24 | How well can we avoid bad outcomes for women with high blood pressure in pregnancy by correctly testing how serious her condition is? | 19 |
| 26 | How can health workers in Ghana explain high blood pressure in pregnancy to patients in a simple way they can understand? | 17 |
| 26 | When are and should women with high blood pressure in pregnancy be referred (sent) to a different type of health center in Ghana? | 17 |
| 28 | What are the experiences of women with high blood pressure in pregnancy in Ghana after they gave birth? | 16 |
| 28 | How much do patients need to pay for treatment for high blood pressure in pregnancy, and what happens when they cannot afford this cost? | 16 |
| 28 | Are there ways to predict how serious high blood pressure in pregnancy will turn out to be once the patient has it? | 16 |
| 31 | How can we educate patients or survivors of high blood pressure in pregnancy so that they are less afraid that they will get it again? | 15 |
| 31 | How can patients in Ghana be involved more in making decisions about the care they receive for their high blood pressure in pregnancy? | 15 |
| 33 | What is the best way to care for women with high blood pressure in pregnancy in Ghana after they gave birth? | 14 |
| 33 | How can we make sure that all women in Ghana receive care before they get pregnant, so that their bodies are ready for pregnancy? | 14 |
| 33 | What is the health outcome of having high blood pressure in pregnancy for the mother and the baby in Ghana nowadays? | 14 |
| 36 | How much does it cost hospitals in Ghana to test for each woman how serious the high blood pressure in pregnancy might become, and how can we make this cheaper? | 13 |
| 37 | How well can we avoid bad outcomes of high blood pressure in pregnancy by providing good care to women with HDP in Ghana? | 12 |
| 37 | How well do health workers in Ghana explain the causes and risks of high blood pressure in pregnancy to patients and how can this be improved? | 12 |
| 37 | How can women in Ghana already get counselling (explanation) on high blood pressure in pregnancy before they become pregnant? | 12 |
| 40 | Which misunderstandings and incorrect beliefs exist in Ghana about the diagnosis (detection) of high blood pressure in pregnancy? | 11 |
| 40 | What are the reasons for diagnosing (detecting) high blood pressure in pregnancy late in Ghana? | 11 |
| 40 | How can we care for women with high blood pressure in pregnancy in Ghana in the best way possible? | 11 |
| 40 | Do women with high blood pressure in pregnancy in Ghana follow the instructions from the health workers, and how can we improve this? | 11 |
| 44 | How can we make sure that all women in Ghana with high blood pressure in pregnancy receive care from a psychologist (therapist)? | 10 |
| 45 | How good are the existing medicines for avoiding (preventing) high blood pressure in pregnancy, and how can we make better ones? | 9 |
| 45 | How can we make sure that audits (sessions where health workers come together to talk about what happened with patients to see how they can do better next time) are done for every patient with high blood pressure in pregnancy in Ghana? | 9 |
| 47 | How are women with high blood pressure in pregnancy in Ghana cared for right now? | 8 |
| 47 | How different is the care for women in Ghana with high blood pressure in pregnancy in different places and different types of hospitals? | 8 |
| 47 | How much do people in Ghana know about why women get high blood pressure in their pregnancy, and how can we improve this? | 8 |
| 50 | How good is the treatment for high blood pressure in pregnancy as it is now in Ghana? | 7 |
| 51 | Can we create new medicines for high blood pressure in pregnancy, and if so, how can we do this? | 6 |

Professionals:

| Rank | Question | Votes |
| --- | --- | --- |
| 1 | How can we make sure that people in Ghana know how serious high blood pressure in pregnancy is and what can happen? | 48 |
| 2 | How can we improve the number of pregnant women in Ghana that go to antenatal checks? | 43 |
| 3 | How can quickly detecting high blood pressure help prevent bad outcomes of high blood pressure in pregnancy as much as possible? | 36 |
| 4 | How well do healthcare workers in Ghana know the possible outcomes of HDP and how to avoid a bad outcome? | 34 |
| 5 | How do women with preeclampsia and their families in Ghana deal with having this condition? | 33 |
| 5 | How can patients in Ghana be involved more in making decisions about the care they receive for their high blood pressure in pregnancy? | 33 |
| 7 | Why do women get high blood pressure in pregnancy and what makes the chance bigger that a woman gets it? | 32 |
| 7 | Can we avoid that a woman gets high blood pressure in pregnancy and if so, how? | 32 |
| 7 | How well do health workers in Ghana explain the causes and risks of high blood pressure in pregnancy to patients and how can this be improved? | 32 |
| 10 | How can we make sure that all women in Ghana receive care before they get pregnant, so that their bodies are ready for pregnancy? | 31 |
| 10 | How much do people in Ghana know about why women get high blood pressure in their pregnancy, and how can we improve this? | 31 |
| 12 | How can we diagnose (detect) high blood pressure early in pregnancy (before the woman notices anything)? | 30 |
| 12 | What do husbands and other relatives of women with high blood pressure in pregnancy in Ghana do in the care for the women? | 30 |
| 14 | What difficulties do health workers in Ghana face in finding out (detecting) if a woman has high blood pressure in pregnancy? | 29 |
| 15 | How can we care for women with high blood pressure in pregnancy in Ghana in the best way possible? | 27 |
| 15 | How big is the chance that high blood pressure in pregnancy will come back in a next pregnancy in Ghana? | 27 |
| 15 | How can women in Ghana already get counselling (explanation) on high blood pressure in pregnancy before they become pregnant? | 27 |
| 18 | What are the challenges that health workers in Ghana face with treating high blood pressure in pregnancy in the right way and on time? | 26 |
| 18 | What is the best way to care for women with high blood pressure in pregnancy in Ghana after they gave birth? | 26 |
| 18 | What kind of information should women with HDP in Ghana get about the possible outcomes of their condition, and how should they get this information? | 26 |
| 21 | What are the reasons for diagnosing (detecting) high blood pressure in pregnancy late in Ghana? | 25 |
| 21 | How much do people in Ghana know about high blood pressure in pregnancy, and how can we improve this? | 25 |
| 21 | How well do health workers in Ghana explain to women with high blood pressure in pregnancy how it will be treated, and how can this be improved? | 25 |
| 21 | Do women with high blood pressure in pregnancy in Ghana follow the instructions from the health workers, and how can we improve this? | 25 |
| 21 | What is the health outcome of having high blood pressure in pregnancy for the mother and the baby in Ghana nowadays? | 25 |
| 26 | How accurate is the screening, check-up and diagnosis (detection) of high blood pressure among pregnant women in Ghana, and how can this be improved? | 24 |
| 26 | How much does it cost Ghanaian women to do the tests for diagnosing (detecting) high blood pressure in pregnancy, and how can this be made cheaper for them? | 24 |
| 26 | How can we make sure that all women in Ghana with high blood pressure in pregnancy receive care from a psychologist (therapist)? | 24 |
| 26 | Are there ways to predict how serious high blood pressure in pregnancy will turn out to be once the patient has it? | 24 |
| 26 | Is it possible to develop a test to see how big the chance is that a woman will get high blood pressure in pregnancy, and how good are these tests? | 24 |
| 31 | How can we correct the myths and incorrect beliefs about why women get high blood pressure in pregnancy in Ghana? | 23 |
| 31 | How can we educate patients or survivors of high blood pressure in pregnancy so that they are less afraid that they will get it again? | 23 |
| 33 | What unfair differences exist among different people and different places in Ghana when it comes to correctly detecting high blood pressure in pregnancy on time, and how can we make these differences less? | 21 |
| 33 | How well can we avoid bad outcomes for women with high blood pressure in pregnancy by correctly testing how serious her condition is? | 21 |
| 33 | What is the effect of high blood pressure in pregnancy on emotions and mental well-being in Ghana? | 21 |
| 36 | What problems (side effects) can the medicines used for high blood pressure in pregnancy in Ghana give? | 19 |
| 36 | How can we use non-drug treatments in the care for women with high blood pressure in pregnancy in Ghana? | 19 |
| 38 | When are and should women with high blood pressure in pregnancy be referred (sent) to a different type of health center in Ghana? | 17 |
| 38 | How well can we avoid bad outcomes of high blood pressure in pregnancy by providing good care to women with HDP in Ghana? | 17 |
| 38 | How can we make sure that audits (sessions where health workers come together to talk about what happened with patients to see how they can do better next time) are done for every patient with high blood pressure in pregnancy in Ghana? | 17 |
| 41 | Which misunderstandings and incorrect beliefs exist in Ghana about the diagnosis (detection) of high blood pressure in pregnancy? | 16 |
| 41 | How can health workers in Ghana explain high blood pressure in pregnancy to patients in a simple way they can understand? | 16 |
| 43 | What are the experiences of women with high blood pressure in pregnancy in Ghana after they gave birth? | 15 |
| 43 | How good is the treatment for high blood pressure in pregnancy as it is now in Ghana? | 15 |
| 43 | How good are the existing medicines for avoiding (preventing) high blood pressure in pregnancy, and how can we make better ones? | 15 |
| 43 | How different is the care for women in Ghana with high blood pressure in pregnancy in different places and different types of hospitals? | 15 |
| 47 | How much do patients need to pay for treatment for high blood pressure in pregnancy, and what happens when they cannot afford this cost? | 13 |
| 48 | How well do health workers in Ghana explain the condition to pregnant women with high blood pressure, and how can we improve this? | 12 |
| 49 | How are women with high blood pressure in pregnancy in Ghana cared for right now? | 10 |
| 49 | Can we create new medicines for high blood pressure in pregnancy, and if so, how can we do this? | 10 |
| 51 | How much does it cost hospitals in Ghana to test for each woman how serious the high blood pressure in pregnancy might become, and how can we make this cheaper? | 8 |

1. **Interim priority list** (based on combining patient/carers and professional responses from appendix G)

| Rank | Question (Medical version) | Question (Plain version) |
| --- | --- | --- |
| 1 | How can we create awareness about the severity and complications of HDP in Ghana? | How can we make sure that people in Ghana know how serious high blood pressure in pregnancy is and what can happen? |
| 2 | What are the causes and risk factors of HDP in Ghana? | Why do women get high blood pressure in pregnancy and what makes the chance bigger that a woman gets it? |
| 3 | How adequate are healthcare professionals' knowledge and skills regarding HDP complications and prognosis in Ghana? | How well do healthcare workers in Ghana know the possible outcomes of HDP and how to avoid a bad outcome? |
| 4 | What are strategies to improve antenatal care attendance in Ghana? | How can we improve the number of pregnant women in Ghana that go to antenatal checks? |
| 5 | Is prevention of HDP possible and if so, how? | Can we avoid that a woman gets high blood pressure in pregnancy and if so, how? |
| 6 | What are the adverse effects of commonly used HDP medication in Ghana? | What problems (side effects) can the medicines used for high blood pressure in pregnancy in Ghana give? |
| 7 | What is the accuracy of screening and diagnosis of HDP among women in Ghana, and how can this be improved? | How accurate is the screening, check-up and diagnosis (detection) of high blood pressure among pregnant women in Ghana, and how can this be improved? |
| 8 | What role do patients' partners play in the treatment of HDP in Ghana? | What do husbands and other relatives of women with high blood pressure in pregnancy in Ghana do in the care for the women? |
| 9 | What coping strategies do preeclampsia patients, their partners and relatives use in Ghana? | How do women with preeclampsia and their families in Ghana deal with having this condition? |
| 10 | To what extent can complications be prevented through accurate and timely diagnosis of HDP in Ghana? | How can quickly detecting high blood pressure help prevent bad outcomes of high blood pressure in pregnancy as much as possible? |
| 11 | What are the challenges for healthcare professionals in Ghana in diagnosing HDP? | What difficulties do health workers in Ghana face in finding out (detecting) if a woman has high blood pressure in pregnancy? |
| 12 | What is the current level of awareness about HDP in Ghana, and how can this be increased? | How much do people in Ghana know about high blood pressure in pregnancy, and how can we improve this? |
| 13 | What education needs to be provided to HDP patients in Ghana about their prognosis, and how should this be done? | What kind of information should women with HDP in Ghana get about the possible outcomes of their condition, and how should they get this information? |
| 14 | What are the possibilities for early diagnosis of HDP in Ghana (before presence of symptoms)? | How can we diagnose (detect) high blood pressure early in pregnancy (before the woman notices anything)? |
| 15 | To what extent do healthcare professionals in Ghana educate HDP patients about their treatment, and how can this be improved? | How well do health workers in Ghana explain to women with high blood pressure in pregnancy how it will be treated, and how can this be improved? |
| 16 | What are the challenges for healthcare professionals in Ghana regarding the provision of adequate treatment for HDP? | What are the challenges that health workers in Ghana face with treating high blood pressure in pregnancy in the right way and on time? |
| 17 | What is the emotional and psychological impact of HDP in Ghana? | What is the effect of high blood pressure in pregnancy on emotions and mental well-being in Ghana? |
| 18 | What are biomarkers for risk prediction in HDP, and how reliable are these in Ghana? | Is it possible to develop a test to see how big the chance is that a woman will get high blood pressure in pregnancy, and how good are these tests? |
| 19 | What is the risk of recurrence of HDP in Ghana? | How big is the chance that high blood pressure in pregnancy will come back in a next pregnancy in Ghana? |
| 20 | What is the role of patient involvement, risk communication and shared decision making regarding HDP in Ghana? | How can patients in Ghana be involved more in making decisions about the care they receive for their high blood pressure in pregnancy? |
| 21 | How can we best address myths or misconceptions about the causes and risk factors of HDP in Ghana? | How can we correct the myths and incorrect beliefs about why women get high blood pressure in pregnancy in Ghana? |
| 22 | What is the financial burden of diagnostic tests for HDP patients in Ghana, and how can this be improved? | How much does it cost Ghanaian women to do the tests for diagnosing (detecting) high blood pressure in pregnancy, and how can this be made cheaper for them? |
| 23 | What are the existing inequities in screening, diagnostic criteria, timing and accuracy of HDP diagnosis in Ghana, and how can these be improved? | What unfair differences exist among different people and different places in Ghana when it comes to correctly detecting high blood pressure in pregnancy on time, and how can we make these differences less? |
| 24 | What non-pharmacological options could support HDP treatment in Ghana? | How can we use non-drug treatments in the care for women with high blood pressure in pregnancy in Ghana? |
| 25 | How can preconception management be integrated into the standard maternal health services in Ghana? | How can we make sure that all women in Ghana receive care before they get pregnant, so that their bodies are ready for pregnancy? |
| 26 | To what extent do healthcare professionals in Ghana educate pregnant women and HDP patients about the causes and risk factors of HDP, and how can this be improved? | How well do health workers in Ghana explain the causes and risks of high blood pressure in pregnancy to patients and how can this be improved? |
| 27 | To what extent do healthcare professionals in Ghana explain the diagnosis of HDP to patients, and how can this be improved? | How well do health workers in Ghana explain the condition to pregnant women with high blood pressure, and how can we improve this? |
| 28 | To what extent does establishing an adequate prognosis prevent complications of HDP in Ghana? | How well can we avoid bad outcomes for women with high blood pressure in pregnancy by correctly testing how serious her condition is? |
| 29 | What are predictive factors for the severity of HDP? | Are there ways to predict how serious high blood pressure in pregnancy will turn out to be once the patient has it? |
| 30 | What is the best way to manage HDP patients after delivery in Ghana? | What is the best way to care for women with high blood pressure in pregnancy in Ghana after they gave birth? |
| 31 | What is the current maternal and fetal prognosis of HDP in Ghana? | What is the health outcome of having high blood pressure in pregnancy for the mother and the baby in Ghana nowadays? |
| 32 | To what extent can counselling for HDP patients and survivors be used to reduce fear of HDP reoccurrence? | How can we educate patients or survivors of high blood pressure in pregnancy so that they are less afraid that they will get it again? |
| 33 | How can women be counselled pre-conception on HDP in Ghana? | How can women in Ghana already get counselling (explanation) on high blood pressure in pregnancy before they become pregnant? |
| 34 | What are the best ways to manage HDP patients in Ghana with the existing therapies? | How can we care for women with high blood pressure in pregnancy in Ghana in the best way possible? |
| 35 | What is the current level of awareness about causes and risk factors of HDP in Ghana, and how can this be increased? | How much do people in Ghana know about why women get high blood pressure in their pregnancy, and how can we improve this? |
| 36 | When are and should HDP patients in Ghana be referred to other health facility levels? | When are and should women with high blood pressure in pregnancy be referred (sent) to a different type of health center in Ghana? |
| 37 | How can healthcare providers make sure that their questions and explanations are understandable for all HDP patients in Ghana? | How can health workers in Ghana explain high blood pressure in pregnancy to patients in a simple way they can understand? |
| 38 | What are the causes of delay in HDP diagnosis in Ghana? | What are the reasons for diagnosing (detecting) high blood pressure in pregnancy late in Ghana? |
| 39 | To what extent do HDP patients in Ghana adhere to recommended therapy, what factors influence this (barriers/enablers), and how can this be improved? | Do women with high blood pressure in pregnancy in Ghana follow the instructions from the health workers, and how can we improve this? |
| 40 | What are the postpartum experiences of HDP patients in Ghana? | What are the experiences of women with high blood pressure in pregnancy in Ghana after they gave birth? |
| 41 | How can the involvement of a psychologist successfully be implemented as a standard part of HDP treatment in Ghana? | How can we make sure that all women in Ghana with high blood pressure in pregnancy receive care from a psychologist (therapist)? |
| 42 | What are the out-of-pocket costs of treatment for HDP patients in Ghana, and what are the consequences for patients who cannot afford their treatment? | How much do patients need to pay for treatment for high blood pressure in pregnancy, and what happens when they cannot afford this cost? |
| 43 | To what extent can complications of HDP be prevented through adequate treatment in Ghana? | How well can we avoid bad outcomes of high blood pressure in pregnancy by providing good care to women with HDP in Ghana? |
| 44 | Which myths exist in Ghana regarding the diagnosis of HDP? | Which misunderstandings and incorrect beliefs exist in Ghana about the diagnosis (detection) of high blood pressure in pregnancy? |
| 45 | How can audits for HDP be implemented in Ghana? | How can we make sure that audits (sessions where health workers come together to talk about what happened with patients to see how they can do better next time) are done for every patient with high blood pressure in pregnancy in Ghana? |
| 46 | What is the effectiveness of current prophylactic (preventive) treatment for HDP, and what is the potential for more effective drugs? | How good are the existing medicines for avoiding (preventing) high blood pressure in pregnancy, and how can we make better ones? |
| 47 | What is the financial burden of prognostic tests for HDP on health facilities in Ghana, and how can this be improved? | How much does it cost hospitals in Ghana to test for each woman how serious the high blood pressure in pregnancy might become, and how can we make this cheaper? |
| 48 | How does the quality of HDP management differ between healthcare facilities and rural compared to urban settings in Ghana? | How different is the care for women in Ghana with high blood pressure in pregnancy in different places and different types of hospitals? |
| 49 | What is the effectivity of current treatments for HDP in Ghana? | How good is the treatment for high blood pressure in pregnancy as it is now in Ghana? |
| 50 | How are HDP patients currently managed in Ghana? | How are women with high blood pressure in pregnancy in Ghana cared for right now? |
| 51 | What are the possibilities for developing new medication for HDP? | Can we create new medicines for high blood pressure in pregnancy, and if so, how can we do this? |

|  |
| --- |
|  |

**= included for final workshop directly**

**= included for final workshop as wildcard**

1. **Final priority list: plain language version**

| RANK | QUESTION |
| --- | --- |
| 1 | How can we diagnose (detect) high blood pressure in pregnancy earlier in Ghana to help prevent bad outcomes? |
| 2 | Why do women get high blood pressure in pregnancy and what makes the chance bigger that a woman gets it? |
| 3 | What are the challenges that health workers in Ghana face regarding the diagnosis, knowledge of prognosis and treatment of high blood pressure in pregnancy? |
| 4 | How much do people in Ghana know about high blood pressure in pregnancy, and how can we improve this? |
| 5 | How accurate is the screening, check-up and diagnosis (detection) of high blood pressure among pregnant women in Ghana, and how can this be improved? |
| 6 | What is the effect of high blood pressure in pregnancy on emotions and mental well-being in Ghana? |
| 7 | How can patients in Ghana be involved more in making decisions about the care they receive for their high blood pressure in pregnancy? |
| 8 | How can we make sure that all women in Ghana receive care before they get pregnant, so that their bodies are ready for pregnancy? |
| 9 | How do women with high blood pressure in pregnancy, their husbands and families cope with this condition in Ghana? |
| 10 | What problems (side effects) can the medicines used for high blood pressure in pregnancy in Ghana give? |

| OTHER QUESTIONS |
| --- |
| How can we improve the number of pregnant women in Ghana that go to antenatal checks? |
| How much does it cost Ghanaian women to do the tests for diagnosing (detecting) high blood pressure in pregnancy, and how can this be made cheaper for them? |
| Is it possible to develop a test to see how big the chance is that a woman will get high blood pressure in pregnancy, and how good are these tests? |
| How big is the chance that high blood pressure in pregnancy will come back in a next pregnancy in Ghana? |
| How can we correct the myths and incorrect beliefs about why women get high blood pressure in pregnancy in Ghana? |
| Can we avoid that a woman gets high blood pressure in pregnancy and if so, how? |
| What unfair differences exist among different people and different places in Ghana when it comes to correctly detecting high blood pressure in pregnancy on time, and how can we make these differences less? |
| How can we use non-drug treatments in the care for women with high blood pressure in pregnancy in Ghana? |

1. **Small group rankings and interim collated ranking**

Small group rankings session two + collated ranking:

| Question* | Rank Group 1 | Rank Group 2 | Rank Group 3 | Rank Group 4 | Collated rank |
| --- | --- | --- | --- | --- | --- |
| G | 2 | 5 | 6 | 4 | **1** |
| A | 12 | 1 | 1 | 6 | **2** |
| Q | 5 | 2 | 10 | 3 | **3** |
| C | 1 | 19 | 8 | 1 | **4** |
| T | 14 | 10 | 3 | 2 | **5** |
| H | 13 | 7 | 4 | 8 | **6** |
| E | 10 | 6 | 7 | 10 | **7** |
| J | 4 | 8 | 14 | 7 | **8** |
| I | 3 | 4 | 15 | 15 | **9** |
| F | 18 | 11 | 5 | 5 | **10** |
| P | 16 | 9 | 2 | 12 | **11** |
| R | 9 | 17 | 9 | 13 | **12** |
| K | 15 | 3 | 18 | 14 | **13** |
| N | 7 | 12 | 21 | 16 | **14** |
| M | 6 | 18 | 17 | 17 | **15** |
| B | 8 | 20 | 13 | 18 | **16** |
| D | 17 | 15 | 21 | 11 | **17** |
| X | 21 | 14 | 11 | 21 | **18** |
| S | 11 | 21 | 20 | 19 | **19** |
| L | 19 | 13 | 19 | 21 | **20** |
| V | 21 | 21 | 21 | 9 | **21** |
| W | 20 | 21 | 12 | 21 | **22** |
| O | 21 | 16 | 21 | 20 | **23** |
| Y | 21 | 21 | 16 | 21 | **24** |
| U | 21 | 21 | 21 | 21 | **25** |

**Legend: questions beyond rank 20 were not given separate ranks by the small groups 🡪 questions 21-25 were all noted as rank 21.**

Small group rankings session three:

| Question* | Rank Group 1 | Rank Group 2 | Rank Group 3 | Rank Group 4 | Collated rank |
| --- | --- | --- | --- | --- | --- |
| G | 7 | 3 | 1 | 1 | **1** |
| C | 3 | 2 | 3 | 5 | **2** |
| Q | 6 | 4 | 2 | 2 | **3** |
| J | 2 | 1 | 9 | 11 | **4** |
| T | 4 | 5 | 6 | 4 | **5** |
| A | 1 | 9 | 11 | 3 (incl J) | **6** |
| I | 5 | 11 | 4 | 8 | **7** |
| E | 11 | 6 | 5 | 7 | **8** |
| P | 8 | 7 | 8 | 11 | **9** |
| F | 10 | 8 | 7 | 9 (incl P) | **10** |
| H | 9 | 10 | 11 | 6 | **11** |
| V | 11 | 11 | 10 | 10 | **12** |
| B | 11 | 11 | 11 | 11 | **13** |
| D | 11 | 11 | 11 | 11 | **13** |
| K | 11 | 11 | 11 | 11 | **13** |
| L | 11 | 11 | 11 | 11 | **13** |
| M | 11 | 11 | 11 | 11 | **13** |
| N | 11 | 11 | 11 | 11 | **13** |
| O | 11 | 11 | 11 | 11 | **13** |
| R | 11 | 11 | 11 | 11 | **13** |
| S | 11 | 11 | 11 | 11 | **13** |
| U | 11 | 11 | 11 | 11 | **13** |
| W | 11 | 11 | 11 | 11 | **13** |
| X | 11 | 11 | 11 | 11 | **13** |
| Y | 11 | 11 | 11 | 11 | **13** |

**Legend: questions beyond rank 10 were not ranked during the 3rd small group session 🡪 all questions that were not ranked were noted as rank 11.**

*Letter-question translation:

| Letter | Question |
| --- | --- |
| A | How much do people in Ghana know about high blood pressure in pregnancy, and how can we improve this? |
| B | How can we improve the number of pregnant women in Ghana that go to antenatal checks? |
| C | Why do women get high blood pressure in pregnancy and what makes the chance bigger that a woman gets it? |
| D | What difficulties do health workers in Ghana face in finding out (detecting) if a woman has high blood pressure in pregnancy? |
| E | What is the effect of high blood pressure in pregnancy on emotions and mental well-being in Ghana? |
| F | How can patients in Ghana be involved more in making decisions about the care they receive for their high blood pressure in pregnancy? |
| G | How can quickly detecting high blood pressure help prevent bad outcomes of high blood pressure in pregnancy as much as possible? |
| H | What kind of information should women with HDP in Ghana get about the possible outcomes of their condition, and how should they get this information? |
| I | How can we diagnose (detect) high blood pressure early in pregnancy (before the woman notices anything)? |
| J | How can we make sure that people in Ghana know how serious high blood pressure in pregnancy is and what can happen? |
| K | How do women with preeclampsia and their families in Ghana deal with having this condition? |
| L | How big is the chance that high blood pressure in pregnancy will come back in a next pregnancy in Ghana? |
| M | What problems (side effects) can the medicines used for high blood pressure in pregnancy in Ghana give? |
| N | How well do healthcare workers in Ghana know the possible outcomes of HDP and how to avoid a bad outcome? |
| O | Can we avoid that a woman gets high blood pressure in pregnancy and if so, how? |
| P | How well do health workers in Ghana explain to women with high blood pressure in pregnancy how it will be treated, and how can this be improved? |
| Q | What are the challenges that health workers in Ghana face with treating high blood pressure in pregnancy in the right way and on time? |
| R | What do husbands and other relatives of women with high blood pressure in pregnancy in Ghana do in the care for the women? |
| S | Is it possible to develop a test to see how big the chance is that a woman will get high blood pressure in pregnancy, and how good are these tests? |
| T | How accurate is the screening, check-up and diagnosis (detection) of high blood pressure among pregnant women in Ghana, and how can this be improved? |

1. **Post-workshop adjustments to the indicative questions**

**Legend:**

|  |
| --- |
|  |

**= existing indicative question**

**= newly formulated indicative question**

| How can quickly detecting high blood pressure help prevent bad outcomes of high blood pressure in pregnancy as much as possible? |
| --- |
| How can we diagnose (detect) high blood pressure early in pregnancy (before the woman notices anything)? |

| How can we diagnose (detect) high blood pressure in pregnancy earlier in Ghana to help prevent bad outcomes? |
| --- |

⇒

| What are the challenges that health workers in Ghana face with treating high blood pressure in pregnancy in the right way and on time? |
| --- |
| How well do healthcare workers in Ghana know the possible outcomes of HDP and how to avoid a bad outcome? |
| What difficulties do health workers in Ghana face in finding out (detecting) if a woman has high blood pressure in pregnancy? |

| What are the challenges that health workers in Ghana face regarding the diagnosis, knowledge of prognosis and treatment of high blood pressure in pregnancy? |
| --- |

⇒

| What do husbands of women with high blood pressure in pregnancy in Ghana do in the care for the women? |
| --- |
| How do women with preeclampsia and their families in Ghana deal with having this condition? |

| How do women with high blood pressure in pregnancy, their husbands and families cope with this condition in Ghana? |
| --- |

⇒

| How can we make sure that people in Ghana know how serious high blood pressure in pregnancy is and what can happen? |
| --- |
| How much do people in Ghana know about high blood pressure in pregnancy, and how can we improve this? |

| How much do people in Ghana know about high blood pressure in pregnancy, and how can we improve this? |
| --- |

⇒

| How well do health workers in Ghana explain to women with high blood pressure in pregnancy how it will be treated, and how can this be improved? |
| --- |
| What kind of information should women with HDP in Ghana get about the possible outcomes of their condition, and how should they get this information? |

| How can patients in Ghana be involved more in making decisions about the care they receive for their high blood pressure in pregnancy? |
| --- |

⇒
